1 **Higher-order combinatorial chromatin perturbations by engineered**  
2 **CRISPR-Cas12a for functional genomics**

3

4 **Hsiung CC**<sup>1,2,4,9,10</sup>, **Wilson CM**<sup>2,3,4,9,10</sup>, **Sambold NA**<sup>9</sup>, **Dai R**<sup>2,4,5,9,10</sup>, **Chen Q**<sup>7</sup>,  
5 **Misiukiewicz S**<sup>2,4,5</sup>, **Arab A**<sup>10</sup>, **Teyssier N**<sup>6</sup>, **O'Loughlin T**<sup>2,4,9</sup>, **Cofsky JC**<sup>8</sup>, **Shi J**<sup>7</sup>,  
6 **Gilbert LA**<sup>#,2,4,9,10</sup>

7

8 **Author affiliations**

9 <sup>1</sup>Dept. of Pathology, Stanford University School of Medicine, Stanford, CA 94305, USA

10 <sup>2</sup>Dept. of Urology, University of California, San Francisco, CA 94158, USA

11 <sup>3</sup>Tetrad Graduate Program, University of California, San Francisco, CA 94158, USA

12 <sup>4</sup>Helen Diller Family Comprehensive Cancer Center, University of California, San  
13 Francisco, San Francisco, CA 94158

14 <sup>5</sup>Biomedical Sciences Graduate Program, University of California, San Francisco, San  
15 Francisco, CA 94158, USA

16 <sup>6</sup>Biological and Medical Informatics Graduate Program, University of California, San  
17 Francisco, San Francisco, CA 94158, USA

18 <sup>7</sup>Department of Cancer Biology, University of Pennsylvania, Philadelphia, PA, 19104,  
19 USA

20 <sup>8</sup>Department of Biological Chemistry and Molecular Pharmacology, Harvard Medical  
21 School, Boston, MA, 02115, USA

22 <sup>9</sup>Innovative Genomics Institute, University of California, San Francisco, San Francisco,  
23 CA 94158, USA

24 <sup>10</sup>Arc Institute, Palo Alto, CA 94304, USA

25

26 #Correspondence to [luke@arcinstitute.org](mailto:luke@arcinstitute.org)

27

28 **Abstract**

29

30 Multiplexed genetic perturbations are critical for testing functional interactions among  
31 coding or non-coding genetic elements. Compared to DNA cutting, repressive chromatin  
32 formation using CRISPR interference (CRISPRi) avoids genotoxicity and is more  
33 effective for perturbing non-coding regulatory elements in pooled assays. However,  
34 current CRISPRi pooled screening approaches are generally limited to targeting 1-3  
35 genomic sites per cell. To develop a tool for higher-order ( $\geq 3$ ) combinatorial targeting of  
36 genomic sites with CRISPRi in functional genomics screens, we engineered an  
37 *Acidaminococcus* Cas12a variant -- referred to as multiplexed transcriptional  
38 interference AsCas12a (multiAsCas12a). multiAsCas12a significantly outperforms  
39 state-of-the-art Cas12a variants in combinatorial CRISPRi targeting using high-order  
40 multiplexed arrays of CRISPR RNAs (crRNA) delivered by lentiviral transduction,

41 including in high-throughput pooled screens using 6-plex crRNA array libraries. Using  
42 multiAsCas12a CRISPRi, we discover new enhancer elements and dissect the  
43 combinatorial function of cis-regulatory elements. These results demonstrate that  
44 multiAsCas12a enables group testing strategies to efficiently survey potentially  
45 numerous combinations of chromatin perturbations for biological discovery and  
46 engineering.

47

48

## 49 **Introduction**

50 Functional interactions among combinations of genetic elements underlie many natural  
51 and engineered phenotypes (Wong et al. 2016; Costanzo et al. 2019; Domingo et al.  
52 2019). Such interactions can often involve higher-order (3 or more) combinations of  
53 genetic elements. A notable gain-of-function example includes the discovery of 4 factors  
54 as the successful combination that can achieve reprogramming to pluripotency  
55 (Takahashi and Yamanaka 2006). In loss-of-function experiments, discovering the  
56 functions of paralogous genes often requires combined perturbations to overcome  
57 functional redundancy (Parrish et al. 2021; Dede et al. 2020; Gonatopoulos-Pournatzis  
58 et al. 2020; Ewen-Campen et al. 2017). In the non-coding space, multiple cis-regulatory  
59 elements often co-regulate the transcriptional state of a given genomic locus with  
60 varying degrees of functional overlap, often requiring higher-order combinatorial  
61 perturbations to test their functional logic (Osterwalder et al. 2018; Xie et al. 2017; Kvon  
62 et al. 2021; Blayney et al. 2022; Blobel et al. 2021). Thus, combined perturbation of  $\geq 3$   
63 coding or non-coding genetic elements can be critical for discovering and engineering  
64 biological properties, otherwise unattainable by lower-order perturbations.

65

66 Despite the value of higher-order genetic perturbations across biological contexts, such  
67 perturbations have been generally difficult to achieve in a scalable manner, with prior  
68 systematic analyses primarily achieved in yeast (Kuzmin et al. 2018; Domingo et al.  
69 2018; Taylor and Ehrenreich 2014, 2015; Celaj et al. 2020). In mammalian functional  
70 genomics, pooled CRISPR screens are currently the most widely adopted and scalable  
71 approaches (Doench 2018; Przybyla and Gilbert 2022). Such screens use pooled oligo  
72 synthesis for one-pot cloning of a complex guide RNA library, which is delivered to a  
73 population of cells such that each cell generally receives a unique guide RNA construct.  
74 The phenotypes induced by each guide RNA construct are measured in a massively  
75 parallel fashion across the cell population by deep sequencing in a single biological  
76 sample (Doench 2018; Przybyla and Gilbert 2022). However, CRISPR/Cas9-based  
77 pooled screens using sequencing readouts have thus far been limited in multiplexing  
78 capability, with only a few studies targeting 3 genomic sites per cell (Zhou et al. 2020;  
79 Wong et al. 2015; Adamson et al. 2016). Further multiplexing using Cas9-based pooled  
80 screening is challenging due to 1) increasingly complex iterative cloning schemes for

81 larger constructs encoding for multiple sgRNAs each expressed from a separate  
82 promoter ((Zhou et al. 2020; Wong et al. 2015; Adamson et al. 2016)), and 2)  
83 length-dependent high frequencies of recombination in sgRNA libraries that are typically  
84 delivered as lentiviral constructs (Adamson et al. 2018; Sack et al. 2016; Basu et al.  
85 2008). Moreover, conceptually, it remains unclear how to tractably survey the potentially  
86 vast combinatorial spaces for  $\geq 3$ -plex perturbations.

87

88 Cas12a, a member of the type V CRISPR-Cas family, has been proposed as an  
89 alternative to (d)Cas9 for genetic perturbations due to enhanced multiplexing  
90 capabilities. Cas12a harbors RNase activity, separable from its DNase activity, that can  
91 process a compact primary transcript expressed from a single promoter into multiple  
92 CRISPR RNAs (crRNA), without the need for tracrRNA (Fonfara et al. 2016; Zetsche et  
93 al. 2015). The compactness of the Cas12a crRNA, individually consisting of a 19nt  
94 direct repeat and a 19-23nt spacer, enables deterministic encoding of multiple crRNAs  
95 on a given chemically synthesized oligo for single-step cloning into the plasmid vector,  
96 expressed from a single promoter (Zetsche et al. 2017; Breinig et al. 2019; Campa et al.  
97 2019; DeWeirdt et al. 2021; Gier et al. 2020). Cas12a has been engineered for  
98 mammalian cell applications using its DNase activity to disrupt coding gene function  
99 using single or multiplexed crRNA constructs in individual well-based assays (Breinig et  
100 al. 2019; DeWeirdt et al. 2022; Campa et al. 2019; Zetsche et al. 2017; Kleinstiver et al.  
101 2019; Gonatopoulos-Pournatzis et al. 2020; Zetsche et al. 2015) and in pooled  
102 sequencing screens (Gier et al. 2020; DeWeirdt et al. 2021; Chow et al. 2019; Liu et al.  
103 2019; Dede et al. 2020; Gonatopoulos-Pournatzis et al. 2020; Esmaeili Anvar et al.  
104 2023). However, extended multiplexing with DNase-competent Cas12a is expected to  
105 be constrained by increasing genotoxicity in many biological contexts. Even cancer cell  
106 lines can show cumulative genotoxicity with multi-site double-stranded DNA breaks  
107 (DeWeirdt et al. 2021; Meyers et al. 2017; Aguirre et al. 2016), and non-transformed cell  
108 types can be sensitive to genotoxicity from nuclease targeting of as low as one or two  
109 sites per cell (Chen et al. 2021; Ihry et al. 2018; Bowden et al. 2020; Haapaniemi et al.  
110 2018). In principle, perturbations of genetic elements can avoid genotoxicity by using  
111 DNase-dead Cas enzymes fused to effector domains that alter the chromatin state of  
112 the targeted site, as has been successfully achieved by synthetic transcriptional  
113 repression (CRISPRi) and activation (CRISPRa) by DNase-dead Cas9 (dCas9) fusion  
114 proteins in pooled sequencing screens (Gilbert et al. 2013, 2014; Konermann et al.  
115 2015). Another advantage of CRISPRi over DNase-based screens is that CRISPRi is  
116 more efficient at perturbing enhancers in pooled screens (Ren et al. 2021; Tycko et al.  
117 2019), likely due to its larger genomic window of activity via formation of repressive  
118 chromatin (Ecco et al. 2017). Thus, a DNase-dead Cas12a (dCas12a) functional  
119 genomics platform capable of co-targeting 3 or more genomic sites per cell for CRISPRi

120 would be highly desirable as a general-purpose tool for testing the combinatorial  
121 functions of coding and non-coding genetic elements.

122

123 Despite the success of Cas12a as a tool for DNA cleavage, no dCas12a-based pooled  
124 CRISPRi screening platforms have been reported thus far. Several studies have used  
125 dCas12a for CRISPRi in human cells in individual well-based assays, reporting either  
126 successful (Campa et al. 2019; Guo et al. 2022; Liu et al. 2017; Nuñez et al. 2021) or  
127 unsuccessful (O'Geen et al. 2017) repression of target genes. These dCas12a  
128 transcriptional repression studies delivered crRNA plasmids exclusively by transient  
129 transfection, which introduces high copy number and expression of synthetic  
130 components, but is limited in assay throughput and cell type compatibility. Outcomes  
131 from transient plasmid transfection experiments are often poor surrogates for success in  
132 pooled screens using sequencing readouts (Stegmeier et al. 2005; DeWeirdt et al.  
133 2021), likely because transient transfections can often result in 10 to 1000-fold higher  
134 intracellular concentrations of the delivered components than in pooled screens. Pooled  
135 screens require single-copy integration of crRNA constructs by lentiviral transduction at  
136 low multiplicity of infection (MOI) to ensure that cellular phenotypes can be attributed to  
137 unique crRNA constructs (Doench 2018; Przybyla and Gilbert 2022), imposing a  
138 stringent requirement on the functional potency of each ribonucleoprotein molecule.  
139 Prior published studies reporting use of dCas12a-based for transcriptional repression  
140 (Campa et al. 2019; Guo et al. 2022; Liu et al. 2017; Nuñez et al. 2021) did not use  
141 lentiviral delivery of crRNA constructs, raising the question of whether published  
142 dCas12a CRISPRi constructs are sufficiently potent for high-throughput pooled screens  
143 using sequencing readouts.

144

145 In this study, we show that existing dCas12a CRISPRi fusion constructs function poorly  
146 when used with limiting doses of lentivirally delivered components, thus precluding their  
147 application in pooled functional genomics studies. This deficiency is generally  
148 exacerbated when using multiplexed crRNA arrays, which effectively further dilute the  
149 concentration of Cas12a fusion protein molecules available to bind each individual  
150 crRNA encoded in the array. Given the stark discrepancy in activity between dCas12a  
151 CRISPRi and Cas12a DNA cutting applications, we reasoned that DNase-inactivation in  
152 dCas12a may render fusion proteins ineffective for transcriptional repression, likely by  
153 destabilizing its chromatin occupancy. To overcome this, we engineered a new Cas12a  
154 variant -- referred to as multiAsCas12a (multiplexed transcriptional interference  
155 AsCas12a) -- that incorporates a key mutation, R1226A. Prior in vitro experiments  
156 demonstrated that this mutation slows DNA cutting to a regime that favors  
157 predominantly nicked DNA products and results in a more stable ribonucleoprotein:DNA  
158 complex (Cofsky et al. 2020), but has not been tested in any context related to  
159 transcriptional control in prior literature. We show that in human cells, R1226A

160 significantly enhances CRISPRi activity in the setting of lentivirally delivered crRNA  
161 constructs and enables multiplexed transcriptional repression using up to 10-plex arrays  
162 of crRNAs. We demonstrate that multiAsCas12a critically enables high-throughput  
163 pooled CRISPRi screens, including using 6-plex crRNA arrays. We use multiAsCas12a  
164 CRISPRi to efficiently discover new enhancer elements and to test higher-order  
165 combinatorial perturbations of cis-regulatory elements that co-regulate a locus. We  
166 propose a generalizable group testing framework using multiAsCas12a to realize  
167 exponential efficiency gains in searching through potentially large combinatorial spaces  
168 of chromatin perturbations.

169

## 170 **Results**

171

### 172 **CRISPRi using state-of-the-art dAsCas12a fusion proteins is dose-limited and** 173 **hypoactive in the setting of lentivirally delivered components**

174

175 While several orthologs of Cas12a have been used for mammalian cell applications,  
176 here we focus on building a CRISPRi functional genomics platform using  
177 *Acidaminococcus* Cas12a (AsCas12a) as it is the only ortholog with demonstrated  
178 success in the published literature in DNA cutting-based pooled sequencing screens in  
179 mammalian cells (Gier et al. 2020; DeWeirdt et al. 2021; Chow et al. 2019; Liu et al.  
180 2019; Dede et al. 2020; Gonatopoulos-Pournatzis et al. 2020; Esmaeili Anvar et al.  
181 2023). A previous study reported using dAsCas12a for CRISPRi by plasmid transient  
182 transfection delivery of dAsCas12a-KRABx3 protein (harboring the E993A DNase-dead  
183 mutation) and crRNA in HEK 293T cells (Campa et al. 2019). To test this construct in  
184 the setting of lentivirally delivered crRNA, we introduced dAsCas12a-KRABx3 by  
185 piggyBac transposition in K562 cells and sorted for a pool of cells stably expressing the  
186 construct, as monitored by a P2A-BFP marker. We designed single crRNA constructs  
187 targeting TTV protospacer adjacent motifs (PAM) proximal to transcription start sites  
188 (TSS) of endogenous genes encoding cell surface proteins, whose knockdown by  
189 dCas9-KRAB has been previously successful and is fitness-neutral (Replogle et al.  
190 2022a). Throughout this study we encoded crRNAs in a previously optimized  
191 CROP-seq (Datlinger et al. 2017) style lentiviral vector containing a U6 promoter that  
192 transcribes a pre-crRNA with a 3' direct repeat that enhances crRNA activity (Gier et al.  
193 2020). After lentiviral transduction of single-plex crRNA constructs into K562 cells stably  
194 expressing dAsCas12a-KRABx3 (Fig. 1A), we measured target gene knockdown by  
195 flow cytometry using cell surface antibody staining (Fig. 1B) in cells gated for successful  
196 crRNA transduction (Fig. S1). We observed no expression change in any of the  
197 individually targeted genes (CD55, CD81, B2M and KIT in Fig. 1B and Fig. S2). We  
198 confirmed expression of dAsCas12a-KRABx3 by western blot (Fig. S3) and by routinely  
199 monitoring expression of the in-frame P2A-BFP transgene marker by flow cytometry.

200 This lack of CRISPRi activity when using lentivirally transduced crRNAs is not limited to  
201 K562 cells, as the absence was similarly observed in C4-2B cells (prostate cancer cell  
202 line) stably engineered with dAsCas12a-KRABx3 by piggyBac transposition (Fig. S4). In  
203 contrast, transient co-transfection of dAsCas12a-KRABx3 and CD55-targeting crRNA  
204 plasmids shows modest CRISPRi knockdown in HEK 293T cells (Fig. S5), consistent  
205 with prior work (Campa et al. 2019). These findings indicate that the requirements for  
206 successful transcriptional repression using dAsCas12a-KRABx3 in the setting of  
207 lentivirally delivered crRNA constructs are distinct from those of plasmid transient  
208 transfection delivery in HEK 293T cells used in prior studies reporting successful  
209 Cas12a CRISPRi at a few loci (Campa et al. 2019).

210

211 In an attempt to overcome this lack of CRISPRi activity, we tested combinations of  
212 several Cas12a mutations representing state-of-the-art optimizations of Cas12a from  
213 the literature. These include: 1) E174R/S542R/K548R (enhanced AsCas12a,  
214 enAsCas12a), which are expected to contact PAM proximal DNA and have been shown  
215 to improve DNA cutting in human cells (Kleinstiver et al. 2019); 2) M537R/F870L  
216 (AsCas12a ultra), which interact with the PAM (M537R) and the crRNA stem loop  
217 (F870L), and improve DNA cutting in human cells (Liyang Zhang et al. 2021); 3)  
218 W382A, a mutation that reduces R-loop dissociation in vitro for an orthologous enzyme  
219 (LbCas12a W355A), but has not yet been tested in cells (Naqvi et al. 2022).

220

221 We generated six dAsCas12a variants that each harbor the DNase-inactivating D908A  
222 mutation, plus a select combination of the mutations described above. We cloned these  
223 variants into the same fusion protein architecture (Fig. 1C) consisting of an N-terminal  
224 6x Myc-NLS (Gier et al. 2020) and C-terminal XTEN80-KRAB-P2A-BFP (Replogle et al.  
225 2022) in a lentiviral expression vector. This allows us to monitor fluorescence from the  
226 P2A-BFP reporter by flow cytometry as a quantitative proxy of MOI and transgenic  
227 expression. We tested these constructs for CRISPRi activity by stable lentiviral  
228 expression of each dCas12a variant fusion construct and a crRNA construct targeting  
229 the TSS of either CD55 and CD81 in K562 cells (Fig. 1C and Fig. S6). Among this  
230 panel, denAsCas12a-KRAB (E174R/S542R/K548R, plus D908A DNase-dead mutation)  
231 performed the best and demonstrated strong repression of CD55. However, even for  
232 this best construct we observed weak repression of CD81, indicating inconsistent  
233 performance across crRNAs (Fig. 1C and Fig. S6).

234

235 Dose-response and construct potency are key considerations for multiplexed  
236 applications, as increased multiplexing effectively reduces the concentration of Cas  
237 protein available to bind each individual crRNA. Focusing on denAsCas12a-KRAB as  
238 the top variant, we tested the effect of separately altering the dosage of Cas12a protein  
239 and crRNAs delivered. We found that increasing the MOI of the denAsCas12a-KRAB

240 construct from ~1 to ~5 can improve CRISPRi knockdown of CD81 for a single crRNA  
241 targeting CD81 (crCD81-1) and when encoded in the context of a 3-plex crRNA array in  
242 the 3' position (crCD55-4\_crCD151-3\_crCD81-1), but still at a suboptimal level (~60%  
243 median expression knockdown relative to non-targeting control, Fig. 1D and Fig. S7A).  
244 Even at high protein construct MOI of ~5, we found that CRISPRi activity of  
245 denAsCas12a-KRAB is significantly lost when the crRNA MOI is reduced to <1 to mimic  
246 that required to ensure single-copy integrations in pooled screens using sequencing  
247 readouts (Fig. 1E and Fig. S7B). Even more problematically, across all protein (Fig. 1D  
248 and Fig. S7A) and crRNA (Fig. 1E and Fig. S7B) doses tested, a 3-plex crRNA in the  
249 reverse orientation (CD81-1\_CD151-3\_CD55-4) shows extremely weak CD81  
250 knockdown (~0%-25% median expression knockdown relative to non-targeting control),  
251 indicating that denAsCas12a-KRAB CRISPRi activity can be sensitive to the specific  
252 arrangement of crRNAs encoded in a multiplexed array.

253

254 Given the inconsistent and deficient performance of denAsCas12a-KRAB, we tested an  
255 alternative CRISPRi approach without mutating the RuvC DNase domain. In the setting  
256 of transient plasmid transfection delivery in HEK 293T cells, wild-type AsCas12a protein  
257 without any engineered RuvC DNase domain mutations has been used for  
258 transcriptional control with truncated (15nt) crRNA spacers, which enable DNA binding  
259 but not cleavage (Campa et al. 2019; Breinig et al. 2019). We tested this approach by  
260 fusing KRAB or KRABx3 in different N- and C-terminal arrangements to opAsCas12a  
261 (containing 6x MycNLS and DNA affinity-enhancing mutations E174R/S542R), a  
262 DNase-active Cas12a optimized for pooled screens (Gier et al. 2020). Confirming  
263 previous findings, we showed that the 15nt spacers did not support DNA cleavage,  
264 while the 23nt spacers did (Fig. S8). However, using 15nt spacers, we observed weak  
265 or no cell fitness phenotype as a proxy of CRISPRi activity when targeting the  
266 transcriptional start site of a common essential gene, Rpa3, in two cell lines engineered  
267 with a panel of opAsCas12a fused to KRAB or 3xKRAB (Fig. S8). In total, we have  
268 tested 3 separate approaches that abolish the DNase activity of AsCas12a: 1) E993A in  
269 dAsCas12a-KRABx3, 2) D908A in denAsCas12a-KRAB, and 3) use of truncated  
270 spacers with opAsCas12a fused to KRAB or 3xKRAB. All of these CRISPRi  
271 approaches, despite incorporating state-of-the-art optimizations, perform poorly when  
272 used with lentivirally transduced crRNA constructs. These results collectively suggest  
273 additional optimization of construct potency is required for the goal of developing a  
274 potent and predictable Cas12-based CRISPRi functional genomics platform.

275

276

277 **multiAsCas12a-KRAB (R1226A/E174R/S542R/K548R), a variant that favors a**  
278 **nicked DNA intermediate, substantially improves lentivirally delivered CRISPRi**

279

280 The mediocre performance of dAsCas12a for CRISPRi surprised us given the  
281 successful application of Cas12a in DNA-cutting pooled screens. We wondered whether  
282 full inactivation of DNA cutting in dCas12a may render transcriptional repression  
283 ineffective by adversely impacting other aspects of protein function important for  
284 CRISPRi activity, specifically chromatin occupancy. Previous studies indicate that the  
285 interaction between Cas12a and a DNA target can be strengthened by DNA cleavage  
286 (Singh et al. 2018; Knott et al. 2019; Cofsky et al. 2020). In the Cas12a DNA cleavage  
287 process, a single DNase active site first cuts the non-target strand, followed by cleavage  
288 of the target strand (Swarts and Jinek 2019). While double-strand breaks are undesired  
289 for CRISPRi applications, we wondered whether favoring the intermediate nicked DNA  
290 state might reduce the R-loop dissociation rate (Fig. 2A, see Discussion). In support of  
291 this possibility, in vitro binding assays showed that dCas12a:DNA complexes are 20-fold  
292 more stable when the non-target strand is pre-cleaved (Cofsky et al. 2020), and  
293 single-molecule Förster resonance energy transfer studies suggest that non-target  
294 strand nicking biases Cas12a:DNA complexes away from dissociation-prone  
295 conformations (Zhang et al. 2019; Jeon et al. 2018).

296

297 To engineer nicking-induced stabilization of Cas12a binding to DNA for CRISPRi  
298 applications, we incorporated R1226A, a mutation that has not been tested in the  
299 context of transcriptional control. Relative to WT AsCas12a, the AsCas12a R1226A  
300 mutant protein, described as a nickase in its original characterization (Yamano et al.  
301 2016), is ~100-1,000 fold slower in cleaving the non-target DNA strand and  
302 ~10,000-fold slower in cleaving the target DNA strand in vitro (Cofsky et al. 2020).  
303 Consistent with nicking-induced stabilization, AsCas12a R1226A indeed binds DNA  
304 more strongly in vitro than the fully DNase-inactivated D908A variant (Cofsky et al.  
305 2020). We expect the R1226A mutation to both disfavor R-loop reversal and slow  
306 progression to double-stranded breaks (Fig 2A; see Discussion). We hypothesized that,  
307 by trapping the complex in a nicked-DNA intermediate state, the R1226A mutation  
308 would prolong chromatin occupancy and thus the time available for the KRAB domain to  
309 recruit transcriptional repressive complexes.

310

311 To test the impact of R1226A on CRISPRi activity, we replaced the DNase-inactivating  
312 D908A in denAsCas12a-KRAB with R1226A, and hereafter refer to this Cas12a variant  
313 as multiAsCas12a (multiplexed transcriptional interference, i.e.  
314 R1226A/E174R/S542R/K548R). To test their CRISPRi performance at different protein  
315 doses, we lentivirally transduced denAsCas12a-KRAB and multiAsCas12a-KRAB  
316 constructs at MOI = ~1 vs. MOI = ~5 in K562 cells and sorted for stably expressing  
317 BFP-positive cell population. Using lentivirally delivered crRNAs targeting CD81 and  
318 CD55 as single crRNAs and as part of 3-plex crRNAs, we compared the CRISPRi  
319 performance of multiAsCas12a-KRAB vs. denAsCas12a-KRAB across different



320 combinations of protein MOI and crRNA MOIs. Across a panel of single and 3-plex  
321 crRNA constructs, we found that multiAsCas12a-KRAB consistently achieves robust  
322 CRISPRi with less sensitivity to low protein MOI, and with especially large  
323 improvements over denAsCas12a-KRAB in the setting of low crRNA MOI (Fig. 2B and  
324 Fig. S9) and especially for 3-plex crRNAs (Fig. 2C and Fig. S10). As a notable example,  
325 the 3-plex crRNA (crCD81-1\_crCD151-3\_crCD55-4) that is virtually inactive for CD81  
326 knockdown by denAsCas12a-KRAB even in the setting of high protein MOI ~5 shows  
327 >95% median CD81 expression knockdown by multiAsCas12a-KRAB (Fig. 2C). This  
328 same 3-plex crRNA construct shows double knockdown of CD55 and CD81 in only  
329 14.3% of single cells for denAsCas12a-KRAB vs. 76.7% for multiAsCas12a-KRAB (Fig.  
330 2D). Similarly, multiAsCas12a-KRAB is able to rescue the CRISPRi activity of single and  
331 3-plex crRNA constructs targeting CD151 that are otherwise completely inactive when  
332 used with denAsCas12a-KRAB (Fig. 2E). multiAsCas12a-KRAB CRISPRi activity  
333 shows generally minimal or no off-target effects on the transcriptome as evaluated by  
334 bulk RNA-seq (Fig. S11).

335

336 We characterized the impact on DNA sequence of long-term constitutive targeting of  
337 multiAsCas12a-KRAB to genomic sites in K562 cells. Using K562 cells lentivirally  
338 engineered with multiAsCas12a-KRAB or denAsCas12a-KRAB at protein MOI = ~5, we  
339 tested for the DNA sequence alterations at CRISPRi target sites near the CD55 and  
340 CD81 TSS's after 20 days of constitutive ribonucleoprotein expression. Any DNA  
341 sequence alterations are expected to accumulate over this duration, which is  
342 representative of the upper end of duration for typical CRISPR functional genomics  
343 experiments. We reasoned that testing a highly effective CRISPRi crRNA (crCD55-4)  
344 would represent an experimental condition of high target occupancy over a long time  
345 period, enabling us to estimate the upper end of indel formation. In this experiment, we  
346 observed indel frequencies of 7.9% by multiAsCas12a-KRAB, 0.1% by  
347 denAsCas12a-KRAB, and 97.9% by a fully DNase-active construct, opAsCas12a (Gier  
348 et al. 2020) (Fig. 2F). For crCD81-1, a crRNA with an intermediate level of CRISPRi  
349 activity more representative of most crRNAs we have tested, we observed indel  
350 frequencies of 2.48% by multiAsCas12a-KRAB, 1.25% by denAsCas12a, and 71.5% by  
351 opAsCas12a (Fig. 2F). If indels were the sole driver of target gene knockdown, and  
352 further assuming an indel of any size generates a complete null CD81 allele, in this  
353 triploid region of the K562 genome we would expect ~89.5% of cells to harbor zero  
354 indels and retain full expression level, at most ~10.1% of cells to harbor a deletion of  
355 any size in one DNA copy and thus retain ~67% of CD81 expression level, ~0.38% of  
356 cells to inactivate two DNA copies, and virtually no cells to inactivate all 3 DNA copies  
357 (see Methods). The expected knockdown in median CD81 expression in the cell  
358 population under this adversarial assumption of abolishing expression in *cis* by any  
359 sized deletion would be 3.6% (see Methods). This expectation is wholly inconsistent

360 with the magnitudes of median CD81 expression knockdown by multiAsCas12a-KRAB,  
361 including up to ~95% knockdown in excess of denAsCas12a-KRAB for  
362 crCD81-1\_crCD151-3\_crCD55-4 (Fig. 2C, far right subpanel). This is the first of multiple  
363 lines of evidence, further addressed in subsequent sections, demonstrating that the  
364 magnitude of target gene knockdown by multiAsCas12a-KRAB is far from being  
365 accounted for by DNA sequence alterations alone.

366

### 367 **multiAsCas12a-KRAB enables multi-gene CRISPRi perturbations using** 368 **higher-order arrayed crRNA lentiviral constructs**

369

370 To test the performance of multiAsCas12a-KRAB in targeting >3 genomic sites per cell  
371 for CRISPRi, we designed a lentiviral system for expressing higher-order multiplexed  
372 crRNA arrays, keeping the overall U6 promoter and CROP-seq vector design with a 3'  
373 direct repeat (Gier et al. 2020). To minimize the possibility of lentiviral recombination,  
374 this system (Fig. 3A) uses a unique direct repeat variant at each position of the array,  
375 selected from a set of previously engineered direct repeat variants (DeWeirdt et al.  
376 2020). Using this lentiviral expression system, we assembled a panel of 13 distinct  
377 crRNA constructs (7 single-plex, two 3-plex, two 4-plex, two 5-plex, and two 6-plex),  
378 with the higher-order crRNA arrays assembled from individually active spacers targeting  
379 the TSS's of CD55, CD81, B2M and KIT (Fig. 3B-C and Fig. S12). For this panel of 13  
380 crRNA constructs, we compared the CRISPRi activities of denAsCas12a-KRAB,  
381 multiAsCas12a-KRAB, and multiAsCas12a (no KRAB) as a negative control for the  
382 impact of the KRAB domain. For a subset of crRNA constructs we also added  
383 enAsCas12a-KRAB (DNase fully active) to test the effect of fully active DNA cutting in  
384 conjunction with the KRAB domain in target gene knockdown. Unless otherwise  
385 specified, for these experiments and the remainder of this study we use piggyBac  
386 transposition to constitutively express all fusion protein constructs, which yields results  
387 similar to that obtained from high MOI (~5) lentiviral delivery of protein constructs and  
388 avoids day-to-day variations in lentiviral titers. Each piggyBac-delivered construct is  
389 expressed in K562 cells at very similar protein levels as measured by western blot (Fig.  
390 S3) and routine flow cytometry monitoring of the P2A-BFP fluorescence signal (Fig.  
391 S13).

392

393 To summarize results of the full panel of crRNA constructs, multiAsCas12a-KRAB  
394 substantially outperforms denAsCas12a-KRAB in CRISPRi activity for 7 out of 7  
395 constructs tested for CD81 knockdown (Fig. 3B); 4 out of 6 constructs tested for B2M  
396 knockdown (Fig. S12); and 6 out of 6 constructs tested for KIT knockdown (Fig. 3C). For  
397 CD55 (Fig. S12), multiCas12a-KRAB substantially outperforms denAsCas12a-KRAB for  
398 the single-plex crCD55-5 (weaker spacer), and performs either the same as or  
399 marginally better than denAsCas12a-KRAB for all 7 constructs containing crCD55-4

400 (strongest spacer). Similarly superior CRISPRi performance by multiAsCas12a-KRAB  
401 over denAsCas12a-KRAB was also observed when using up to 6-plex crRNA arrays in  
402 a different cell type, C4-2B prostate cancer cells (Fig. S4).

403

404 For all crRNA constructs tested, multiAsCas12a alone shows much lower impact on  
405 target gene expression than multiAsCas12a-KRAB (e.g. Fig. 3B for CD81),  
406 demonstrating that the large improvements in gene knockdown by  
407 multiAsCas12a-KRAB depends on the KRAB domain. For some target genes, such as  
408 KIT, partial knockdown can be observed for multiAsCas12a alone (Fig. 3C). Such gene  
409 knockdown may be due to 1) direct obstruction of the transcriptional machinery, or 2)  
410 alteration of DNA sequences crucial for transcription via double-stranded break  
411 formation and repair. To distinguish these possibilities, we quantified indels generated  
412 by the panel of fusion proteins using a 6-plex crRNA array  
413 (crCD55-4\_crB2M-1\_crB2M-3\_crKIT-2\_crKIT-3\_crCD81-1) containing two crRNAs  
414 targeting opposite strands at sites 95bp apart near the KIT TSS (Fig. 3D and Fig.  
415 S14A). This genomic distance between two crRNA binding sites is known to optimally  
416 facilitate deletions of the intervening region by DNA cutting Cas proteins (Joberty et al.  
417 2020), thus representing an upper estimate of the frequencies of deleting intervening  
418 regions of multiple target sites in *cis*. The maximum indel frequencies measured for any  
419 given base were only 3%-5.4% for multiAsCas12a and 1.2%-3.7% for  
420 multiAsCas12a-KRAB at each individual crRNA binding site (Fig. 3D, region A and  
421 region C). In the intervening region between the two crRNA binding sites, both  
422 multiAsCas12a and multiAsCas12a-KRAB generated only a maximum of 0.2% indels  
423 (Fig. 3D, region B). In comparison, fully DNase-active enAsCas12a-KRAB generates up  
424 to ~94.5% indels at each individual crRNA binding site and up to 7.6% in the intervening  
425 region (Fig. 3D). Based on these measured indel frequencies and known triploidy of this  
426 K562 genomic region (Zhou et al. 2019), we simulated the expected single-cell gene  
427 expression distributions due to effects purely arising from the maximal observed  
428 frequencies of deletions of any size in the PCR amplicon (Fig. S14B). Under this purely  
429 deletional assumption, we calculated an upper estimate of expected 1.8% median KIT  
430 expression knockdown by multiAsCas12a-KRAB, far less than the observed 90.4%  
431 median expression knockdown, which is 44.4% in excess of the observed for  
432 denAsCas12a-KRAB (Fig. S14B). These results demonstrate that target gene  
433 knockdown by multiAsCas12a-KRAB is largely attributable to non-genetic perturbation  
434 of transcription. For multiAsCas12a (without KRAB), the upper estimate of expected  
435 knockdown under the purely deletional assumption is 2.5%, vs. 67.7% observed (Fig.  
436 S14B). Given the low observed indel frequency and the absence of the KRAB domain,  
437 this observed knockdown for multiAsCas12a likely reflects direct obstruction of the  
438 transcriptional machinery, especially by the crKIT-2 target site downstream of TSS. This  
439 is consistent with previously reported transcriptional interference via direction

440 obstruction by dCas9 (Gilbert et al. 2013, 2014; Qi et al. 2013). Similar trends were  
441 obtained for single-site targeting using crKIT-2 encoded within a 4-plex crRNA array  
442 (Fig. S15). We conclude that marginal effects of indels on target gene knockdown by  
443 multiAsCas12a-KRAB are insufficient to affect interpretations in most functional  
444 genomics applications.

445

446 At the single cell level, multiAsCas12a-KRAB consistently outperforms  
447 denAsCas12a-KRAB in the fraction of single cells with successful double knockdown  
448 (Fig. 3E-F and Fig. S16) and triple knockdown (Fig. 3G and Fig. S16) of target genes  
449 using higher-order crRNA arrays. To test the upper limit of multiplexing, we constructed  
450 8-plex and 10-plex constructs assembled using individually active spacers. In these  
451 8-plex and 10-plex arrays, spacers encoded in various positions within the array  
452 maintain robust CRISPRi activity (i.e. for CD55, KIT and B2M, Fig 3H). However, for  
453 crCD81-1 encoded at the 3' most position shows progressive diminishment in CRISPRi  
454 activity with further multiplexing at 8-plex and 10-plex (Fig. 3H). These results indicate  
455 that 8-plex and 10-plex crRNA arrays at least partially support robust CRISPRi activity  
456 for most spacers within these arrays. The patterns are most consistent with an intrinsic  
457 deficiency of crCD81-1 that is unmasked by a reduction of effective  
458 multiAsCas12a-KRAB concentration by further multiplexing, likely related to its  
459 observed dose sensitivity (Fig. 2B-C). We also observed that a specific 6-plex crRNA  
460 construct (crCD81-1\_crB2M-1\_crB2M-3\_crKIT-2\_crKIT-3\_crCD55-4, 6-plex #2 in Fig.  
461 3H) fails to knockdown B2M while achieving robust CRISPRi of the other target genes.  
462 However, the same combination of spacers in a slightly different 6-plex arrangement  
463 (crCD55-4\_crB2M-1\_crB2M-3\_crKIT-2\_crKIT-3\_crCD81-1) and also in 8-plex and  
464 10-plex embodiments achieve decent B2M knockdown (Fig. 3H). These results indicate  
465 the existence of still unpredictable pre-crRNA sequence context influences on CRISPRi  
466 activity of specific spacers within crRNA arrays that is unrelated to distance from the U6  
467 promoter, and perhaps related to pre-crRNA folding (Creutzburg et al. 2020).

468

469 **multiAsCas12a-KRAB outperforms denCas12a-KRAB and performs similarly to**  
470 **dCas9-KRAB in pooled single-guide CRISPRi screens**

471

472 Given the success of multiAsCas12a-KRAB in individual well-based assays using  
473 lentivirally delivered crRNAs, we next evaluated its performance in the context of  
474 high-throughput pooled screens using sequencing to quantify the activities of each  
475 crRNA construct within a pooled library. We designed a library, referred to as Library 1  
476 (summarized in Fig. S17), aimed at extracting patterns for Cas12a CRISPRi activity with  
477 respect to genomic position relative to the TSS using cell fitness as a readout. Library 1  
478 contains 77,387 single crRNA lentiviral constructs tiling all predicted canonical TTTV  
479 PAM sites and non-canonical PAM's (recognizable by enAsCas12a (Kleinstiver et al.

480 2019)) in the -50bp to +300bp region around the TSS's of 559 common essential genes  
481 with K562 cell fitness defects in prior genome-wide dCas9-KRAB screens (Horlbeck et  
482 al. 2016a). The library also includes two types of negative controls: 1) 524 crRNAs  
483 targeting intergenic regions away from predicted regulatory elements across all human  
484 cell lines based on ENCODE chromatin accessibility data, and 2) 445 non-targeting  
485 crRNAs that do not map to the human genome.

486

487 Using K562 cells piggyBac-engineered to constitutively express multiAsCas12a-KRAB  
488 or denAsCas12a-KRAB, we transduced cells with this TSS tiling crRNA library (MOI =  
489 0.15), collected a sample at the start of the screen and then carried out the cell fitness  
490 screen for ~8 total cell population doublings in replicate. Genomic DNA was extracted  
491 from each sample and the relative abundance of each crRNA in the cell population was  
492 measured by sequencing. In this assay, cell fitness defects due to CRISPRi knockdown  
493 of target essential genes is reflected in depletions of crRNA sequencing read relative  
494 abundances over the duration of the screen. Using relative read abundances  
495 normalized to the medians of negative control crRNAs, we calculate a cell fitness score  
496 for each crRNA construct that quantifies the fractional fitness defect per cell population  
497 doubling (defined as  $\gamma$  in (Kampmann et al. 2013)). Concordance between cell fitness  
498 scores of screen replicates is high for multiAsCas12a-KRAB ( $R = 0.71$ ) and much lower  
499 for denAsCas12a-KRAB ( $R = 0.32$ ), the latter due to much lower signal-to-background  
500 ratio (Fig. S18). The cell fitness score distributions are virtually indistinguishable  
501 between the intergenic targeting negative controls and the non-targeting negative  
502 controls (Fig. S19), indicating no appreciable non-specific genotoxicity from  
503 multiAsCas12a-KRAB single-site targeting. Among the 3,326 crRNA's targeting  
504 canonical TTTV PAM's, 24.5% vs. 17.5% showed a fitness defect in  
505 multiAsCas12a-KRAB vs. denAsCas12a-KRAB, respectively (using the 5th percentile of  
506 intergenic negative controls as a threshold), with the magnitude of effect for each crRNA  
507 overall stronger for multiAsCas12a-KRAB (Fig. 4B). In contrast, crRNAs targeting  
508 non-canonical PAMs show fitness scores less clearly distinguishable from the negative  
509 control distribution (Fig. 4C). We compared our observed cell fitness scores to on-target  
510 activity predictions by CRISPick, the state-of-the-art crRNA activity prediction algorithm  
511 trained on enAsCas12a DNase screening data (DeWeirdt et al. 2021; Kim et al. 2018).  
512 Because CRISPick on-target predictions are already tightly associated with whether a  
513 crRNA targets a TTTV or non-canonical PAM, we analyzed the predictive power of  
514 CRISPick within each of these two PAM categories separately (Fig. 4C). Within each  
515 PAM category, the CRISPick on-target prediction score weakly correlates with the  
516 observed cell fitness score ( $R = -0.18$  for TTTV PAM and  $R = -0.1$  for non-canonical  
517 PAMs), indicating significant sources of crRNA CRISPRi activity variation beyond what  
518 is modeled by CRISPick.

519

520 Previous studies using dCas9-KRAB have identified a strong association between  
521 CRISPRi activity and genomic proximity of the crRNA binding site to the TSS (Gilbert et  
522 al. 2014; Nuñez et al. 2021). To facilitate direct comparison of our current  
523 multiAsCas12a-KRAB and denCas12a-KRAB TSS tiling analysis with prior  
524 dCas9-KRAB data, we focused on crRNAs targeting TTTV PAM's near the TSS's of 240  
525 essential genes for which dCas9-KRAB tiling data is available (Nuñez et al. 2021). The  
526 average cell fitness scores of these crRNAs at each genomic position relative to the  
527 TSS reveal a remarkably similar bimodal pattern in CRISPRi activity as that obtained by  
528 dCas9-KRAB sgRNA's targeting NGG PAM's in the same genomic windows (Fig. 4D).  
529 The weakened activity centered around +125bp to +150bp region is consistent with  
530 hindrance by a well-positioned nucleosome (Nuñez et al. 2021; Horlbeck et al. 2016b).  
531 multiAsCas12a-KRAB shows similar magnitudes of averaged cell fitness scores as  
532 dCas9-KRAB in this meta-TSS analysis, whereas denCas12a-KRAB is substantially  
533 weaker than both at all positions relative to the TSS (Fig. 4D). Using the average  
534 CRISPRi activity of the top 3 best performing crRNAs/sgRNA for each TSS as a  
535 benchmark, multiAsCas12a-KRAB still outperforms denAsCas12a-KRAB and is similar  
536 to dCas9-KRAB for (Fig. 4E). In this comparison, the top 3 sgRNA's per TSS for  
537 dCas9-KRAB are taken from a prior genome-wide screen that used 10 sgRNAs per  
538 TSS, which were pre-selected based on bioinformatic prediction of strong sgRNA  
539 activity (Horlbeck et al. 2016a). In summary, by testing CRISPRi activity across  
540 numerous single crRNAs and genes in these large-scale pooled experiments, we  
541 demonstrate that multiAsCas12a-KRAB systematically outperforms denCas12a-KRAB  
542 (Fig. 4B, Fig. 4D-E) and that multiAsCas12a-KRAB performs similarly to dCas9-KRAB  
543 (Fig. 4D-E).

544

#### 545 **multiAsCas12a-KRAB enables pooled sequencing screens using 6-plex crRNA** 546 **arrays**

547

548 To evaluate the performance of multiAsCas12a-KRAB in pooled sequencing screens  
549 using multiplexed crRNA constructs, we constructed a library consisting of 6-plex  
550 crRNAs, as this length is supported by the upper end of commercially available pooled  
551 oligo synthesis. We refer to this 6-plex library as Library 2 (summarized in Fig. S17),  
552 which includes Sublibrary A (described in this section) and Sublibrary B (described in  
553 the next section). Sublibrary A was designed to contain 84,275 6-plex constructs for  
554 evaluating CRISPRi activity at each of the 6 positions in the array in a K562 cell fitness  
555 screen (Fig. 4F). Each 6-plex construct has one of the 6 positions designated as the  
556 "test" position, which can encode either 1) a spacer targeting one of the top 50 essential  
557 gene TSS's (ranked based on prior dCas9-KRAB screen data (Nuñez et al. 2021)), or 2)  
558 an intergenic negative control (Fig. 4F). The remaining 5 positions in the array are  
559 designated as "context" positions that encode negative control spacers drawn from a

560 separate set of 30 negative control spacers (Fig. 4F). The motivation for this library  
561 design was to enable sampling multiple sets of context spacers for a given test position.  
562

563 The entirety of Library 2 was used in a cell fitness screen conducted as described in the  
564 previous section, but over ~13.5 total cell population doublings in K562 cells  
565 piggyBac-engineered to stably express multiAsCas12a-KRAB. As Library 2 was  
566 designed and cloned prior to the completion of the Library 1 screen, the majority of  
567 Library 2 contains constructs encoding for spacers in the test position that in hindsight  
568 do not produce strong phenotypes as single crRNAs in the Library 1 screen. Thus, we  
569 focused our analysis on 1) 2,987 6-plex crRNA arrays that encode in the test position  
570 one of 123 spacers with empirically strong cell fitness scores as single crRNAs in the  
571 Library 1 screen, and 2) 12,029 6-plex crRNA arrays that encode in the test position one  
572 of 506 negative control spacers. We calculated the average cell fitness scores from the  
573 top 3 context constructs ranked by cell fitness score for a given test position spacer,  
574 applying this calculation equally to essential TSS-targeting test position spacers and  
575 negative control test position spacers (Fig. 4F). The top 3 context-averaged cell fitness  
576 scores for essential TSS-targeting spacer are clearly distinguishable from the negative  
577 control distributions at each test position in the 6-plex array (Fig. 4G), albeit with weaker  
578 magnitudes than for the same spacer encoded as individual single crRNA in the Library  
579 1 screen (Fig. S20). We used the 5th percentile of the intergenic negative control cell  
580 fitness score distribution in each test position as a threshold for calling whether the test  
581 position spacer shows successful CRISPRi activity. Using this threshold, we quantified  
582 the % recall of empirically active single crRNA spacers from the Library 1 screen by the  
583 6-plex crRNA constructs in this Library 2 Sublibrary A screen, observing a range of  
584 59%-85% recall across positions (Fig. 4G). As the % recall is not a monotonically  
585 decreasing function of distance from the U6 promoter, the pattern is inconsistent with  
586 any potential abortive RNA Pol III transcription of the pre-crRNA being the sole driver of  
587 these biases. As each position in the array is assigned a unique direct repeat variant  
588 that is held constant across all constructs in this analysis, it is possible these apparent  
589 positional effects may reflect contributions from unknown properties intrinsic to the direct  
590 repeat variant sequences. These results suggest that redundantly sampling the same  
591 combination of spacers encoded in different orders within arrays can reduce false  
592 negative results. We conclude that multiAsCas12a-KRAB enables pooled sequencing  
593 screens using 6-plex crRNA arrays.

594

### 595 **multiAsCas12a-KRAB enables discovery and higher-order combinatorial** 596 **perturbations of cis-regulatory elements**

597

598 The human genome contains ~500,000 predicted enhancers (ENCODE Project  
599 Consortium et al. 2020), but only a small minority have been functionally tested by

600 perturbations. Previous studies have shown that dCas9 CRISPRi can outperform Cas9  
601 DNA cutting in perturbing enhancer function in pooled screens (Ren et al. 2021; Tycko  
602 et al. 2019), likely due to the broader genomic window DNA that is perturbed by  
603 formation of repressive chromatin versus indels generated by individual guide RNAs. To  
604 our knowledge, no study has reported enhancer perturbation by CRISPRi using  
605 Cas12a. We confirmed that multiAsCas12a-KRAB targeting using single crRNAs can  
606 effectively perturb a known enhancer of the HBG gene, HS2 (Fig. 5A), with knockdown  
607 of HBG mRNA expression in K562 cells comparable to the effect of dCas9-KRAB  
608 targeting HS2 (Li et al. 2020).

609

610 We next aimed to use multiAsCas12a-KRAB to discover previously uncharacterized  
611 enhancers using the CD55 locus in K562 cells as a myeloid cell model. CD55 encodes  
612 for decay-accelerating factor, a cell surface protein that inhibits the activation of  
613 complement and is expressed in most human cell types (Dho et al. 2018). CD55  
614 function in the myeloid lineage is particularly relevant in multiple disease states,  
615 including paroxysmal nocturnal hemoglobinuria (Hillmen et al. 2004) and malaria (Egan  
616 et al. 2015; Shakya et al. 2021). To our knowledge, no known enhancers in myeloid  
617 cells have been identified for CD55. In K562 cells, several DNase hypersensitive sites  
618 (DHS) bearing histone 3 lysine 27 (H3K27Ac), a modification associated with active  
619 enhancers, reside near CD55 (Fig. 5B). The activity-by-contact (ABC) enhancer  
620 prediction algorithm (Fulco et al. 2019) predicts 4 of these DHSs (R1-R4) as candidate  
621 enhancers (Fig. 5B). While R1-R3 reside in a region between 3kb-11kb upstream of the  
622 CD55 promoter, R4 sits in an intronic region of the C1orf116 gene, ~297kb away from  
623 the CD55 promoter (Fig. 5B). To conduct a focused screen of the DHSs within this  
624 general region for enhancers that regulate CD55, we designed a total of 21 4-plex  
625 crRNAs (encompassing 88 individual spacers) targeting 11 regions bearing varying  
626 levels of DNase hypersensitivity and H3K27Ac (R1-R4 predicted by ABC; R5-R11  
627 picked manually), plus a negative control region (R12) devoid of DHS and H3K27Ac.  
628 The regions are each independently targeted by two 4-plex crRNAs (except R10 and  
629 R12 are each targeted by one 4-plex crRNA). Each 4-plex crRNA was lentivirally  
630 transduced into K562 cells piggyBac-engineered to constitutively express  
631 multiAsCas12a-KRAB, followed by flow cytometry readout of CD55 expression. We  
632 found that the ABC-predicted R1-R4 show ~50%-75% reduction in CD55 expression  
633 upon multiAsCas12a CRISPRi targeting, whereas no decrease in CD55 expression is  
634 observed for R5-R12. For each of the functionally validated R1-R4 enhancers, the two  
635 4-plex crRNA arrays that target each enhancer show quantitatively similar levels of  
636 CD55 knockdown (Fig. 5B), indicating each array contains an active 4-plex or  
637 lower-order active combination of spacers. This consistency in the magnitude of CD55  
638 expression knockdown likely reflects the magnitude of true enhancer impact on gene  
639 transcription, rather than technical peculiarities of individual spacer activities, which



640 might be more unpredictably variable and labor-intensive to test if encoded as  
641 single-plex perturbations. In contrast to multiAsCas12a-KRAB, using opAsCas12a to  
642 target R1-R4 for DNA cutting using the same 4-plex crRNAs elicits very little or no CD55  
643 expression knockdown, despite potent knockdown by a positive control crRNA targeting  
644 a coding exon (Fig. 5C). This demonstrates a key advantage of multiAsCas12a-KRAB  
645 over state-of-the-art Cas12a DNA cutting tools for perturbing enhancer function, even in  
646 the setting of multiple crRNA target sites within the same enhancer. These findings are  
647 consistent with prior studies reporting superior performance of dCas9-KRAB over Cas9  
648 for enhancer discovery in pooled screens (Ren et al. 2021; Tycko et al. 2019). To our  
649 knowledge, R1-R4 are the first functionally demonstrated enhancers for CD55 in a  
650 myeloid cell type, in addition to another CD55 enhancer that was recently reported in a  
651 B-cell model (Cheng et al. 2022).

652

653 To further test the utility of multiAsCas12a-KRAB in studies of enhancer function, we  
654 used the MYC locus as a model. MYC is an essential gene in most proliferative cells  
655 when perturbed by CRISPRi, enabling the use of cell fitness as a readout in pooled  
656 screens to identify genomic elements that regulate MYC expression. Prior studies using  
657 CRISPRi pooled screens in K562 cells have shown that MYC expression is proportional  
658 to cell fitness and is regulated by several enhancers identified by both screens using  
659 cell fitness (Fulco et al. 2016) and mRNA expression (Reilly et al. 2021) readouts. A  
660 recent study found that pairwise dCas9-KRAB perturbations of these enhancers showed  
661 stronger phenotypes than perturbing single enhancers (Lin et al. 2022). In that study, a  
662 single-step large scale pooled screen was used to test  $295 \times 295 = 87,025$  pairs of  
663 guide RNAs targeting known MYC enhancers in a single step. To our knowledge, no  
664 study has reported the phenotypic impact of 3-plex or higher-order perturbations of  
665 regulatory elements at the MYC locus.

666

667 We used multiAsCas12a-KRAB to dissect higher-order combinatorial cis-regulation at  
668 the MYC locus. To avoid testing intractably numerous higher-order combinations of  
669 crRNA spacers that are largely uninformative due to the inclusion of weak or inactive  
670 crRNA spacers, we opted to pre-screen for a small group of active 3-plex crRNA  
671 combinations that can be assembled into higher-order combinations in a subsequent  
672 step. We used multiAsCas12a-KRAB to test four 3-plex crRNA constructs targeting  
673 combinations of MYC cis-regulatory elements (3 crRNAs for promoter and 3 crRNAs for  
674 each of 3 known enhancers, e1, e2 and e3) in a well-based cell competition assay (Fig.  
675 6A-B). We found that these four 3-plex crRNAs induce varying degrees of cell fitness  
676 defect as a proxy of MYC expression knockdown. This pre-nomination step indicates  
677 that each construct contains some 3-plex or lower-order spacer combinations that  
678 exhibit CRISPRi activity. For comparison, we included denAsCas12a-KRAB,  
679 multiAsCas12a, enAsCas12a-KRAB and opAsCas12a as controls, which showed

680 relative activities in MYC knockdown phenotype that are consistent with our prior results  
681 from targeting other loci (Fig. 3C and Fig. S12). This further supports  
682 multiAsCas12a-KRAB's superior CRISPRi potency and that the cell fitness phenotypes  
683 elicited by targeting regions in the MYC locus are not attributable to its residual DNA  
684 cutting activity (Fig. 6B).

685

686 We then in silico assembled these 12 nominated spacers and 3 intergenic negative  
687 control spacers into Library 2 Sublibrary B (summarized in Fig. S17), consisting of 6,370  
688 6-plex permutations encoded as 6-plex crRNA arrays (Fig. 6C). These 6-plex crRNA  
689 arrays each target up to 4 cis-regulatory elements (promoter + 3 enhancers) with up to 3  
690 spacers per element. Negative control spacers fill in the remaining positions in arrays  
691 that are not fully filled by targeting spacers. This Sublibrary B was included as part of  
692 the cell fitness screen for the entirety of Library 2, as described in the previous section.  
693 Among 1,823 6-plex arrays with sufficient read coverage for analysis, we grouped them  
694 into 16 categories, based on whether it encodes at least 1 spacer targeting the  
695 promoter, and/or at least 1 spacer targeting each of the 3 enhancers (Fig. 6D). The  
696 6-plex crRNA arrays targeting only e1, e2, or e3 alone showed a modest cell fitness  
697 defect, with e2 having the strongest effect of all 3 enhancers (Fig. 6D, left panel).  
698 Co-targeting each additional enhancer increased the magnitude of fitness defect, such  
699 that the crRNA arrays co-targeting e1/e2/e3 shows the strongest fitness defect (Fig. 6D,  
700 left panel). Co-targeting the promoter together with any combination of enhancers  
701 showed increased cell fitness defect over targeting the promoter alone while also  
702 exhibiting the cumulative effects of multi-enhancer targeting (Fig. 6D, right panel).  
703 These results suggest that when targeting subsets of cis-regulatory elements in a locus  
704 by CRISPRi components, other cis-regulatory elements can compete with KRAB  
705 domain-mediated repression to sustain partial levels of gene transcription. Such effects  
706 may reflect how cis-regulatory elements combinatorially respond to endogenous  
707 repressive cues in the natural regulation of MYC gene transcription. Having multiple  
708 cis-regulatory elements that each contributes to the control of MYC gene transcription  
709 may serve to collectively integrate a broader variety of upstream signals to fine-tune the  
710 transcription of this key regulator of cell growth in a physiologically appropriate manner.  
711 For objectives focused on maximizing CRISPRi knockdown of coding genes,  
712 co-targeting of gene TSS and enhancers may achieve better gene knockdown for  
713 certain loci than targeting the gene TSS alone.

714

## 715 **Discussion**

716 In this study, we engineered multiAsCas12a-KRAB as a new platform for higher-order  
717 combinatorial CRISPRi perturbations of gene transcription and enhancer function. The  
718 enhanced CRISPRi potency of multiAsCas12a-KRAB is more robust to lower effective  
719 concentrations of ribonucleoprotein (Fig. 2B-C, Fig. 2E), critically enabling high-order

720 multiplexing (Fig. 3) and high-throughput pooled screening applications conducted at  
721 single-copy integrations of crRNA expression (Fig. 4 and Fig. 6C-D). We propose that  
722 the improved CRISPRi activity of multiAsCas12a-KRAB emerges from prolonged  
723 chromatin occupancy due to DNA nicking (Fig. 2A). This strategy is conceptually distinct  
724 from prior protein engineering approaches to improving Cas12a function in mammalian  
725 cells, which focused on substituting for positively charged amino acid residues near the  
726 protein:DNA interface (Kleinstiver et al. 2019; Guo et al. 2022), using directed evolution  
727 to optimize DNA cleavage (Zhang et al. 2021), or optimizing transcriptional effector  
728 domain function rather than Cas12a enzymology (Griffith et al. 2023). We propose the  
729 following biophysical explanation for improved multiAsCas12a function, grounded in  
730 prior in vitro literature. In the absence of nicking, R-loop reversal occurs by invasion of  
731 the non-target strand into the crRNA:target strand duplex, displacing the crRNA in a  
732 process analogous to toehold-mediated nucleic acid strand displacement (Srinivas et al.  
733 2013). Severing the non-target strand increases its conformational entropy and  
734 effectively destroys the toehold, decreasing the rate at which the non-target strand can  
735 invade the crRNA:target strand duplex (Srinivas et al. 2013). This mechanistic model  
736 can also explain previous observations of cutting-dependent complex stabilization  
737 (Cofsky et al. 2020; Knott et al. 2019; Singh et al. 2018) and suggests that favoring  
738 nicked DNA intermediates may be a generalizable strategy for improving the efficacy of  
739 other Cas enzymes in chromatin targeting. Another potential explanation for  
740 multiAsCas12a's enhanced CRISPRi activity may be the formation of stabilizing  
741 protein:DNA contacts after non-target-strand nicking (Naqvi et al., 2022). Separately,  
742 DNA nicking is expected to relax local supercoiling, which might affect transcription at  
743 nearby loci (Baranello et al. 2012).

744

745 The multiAsCas12a-KRAB platform enables new solutions to addressing a central  
746 challenge in combinatorial genetics. With increased crRNA multiplexing beyond  $\geq 3$ -plex  
747 combinations, the combinatorial space rapidly explodes in size, with functionally  
748 important combinations being a rare subset of the entire combinatorial space.  
749 Exhaustive testing of all combinations to search is thus highly inefficient and often  
750 infeasible. However, testing a single higher-order N-plex combination also indirectly  
751 tests all or many of its constituent lower-order combinations, for up to a total of  $2^N$   
752 combinations. Thus, increases in multiplexing capability potentially yield exponential  
753 increases in search efficiency using the general concept of group testing (Dorfman  
754 1943; Du 1993). In group testing (Fig. 7), a primary screen is conducted on grouped  
755 subjects (e.g. a multiplexed array of crRNA constructs) to reduce the costs otherwise  
756 incurred by individually testing all subjects (e.g. an individual crRNA). Our screen for  
757 CD55 enhancers instantiates this approach by testing 22 4-plex crRNA arrays targeting  
758 12 candidate regions, therefore indirectly testing  $22 \times 2^4 = 352$  crRNA combinations in a  
759 cost-effective experiment using flow cytometry to assay just 22 wells in a plate (Fig. 5B).

760 For this experimental objective, the grouped hits can be biologically interpreted without  
761 further testing (Fig. 7). For other objectives, such as the combinatorial analysis of  
762 cis-regulation at the MYC locus (Fig. 6), grouped hits can be followed by a focused  
763 secondary pooled screen or individual validation as needed (Fig. 7).

764

765 These results together demonstrate that the group testing framework can be used  
766 flexibly for individual well-based assays and/or pooled screening readouts. For pooled  
767 screens with sequencing readouts, the ability to deterministically program only specific  
768 higher-order combinations of compact Cas12a crRNAs by oligo synthesis for the initial  
769 screen is crucial for group testing. In contrast, cloning combinatorial guide libraries by a  
770 multiplicative and stochastic approach (Zhou et al. 2020) requires testing all  
771 combinations at the onset, and thus are incompatible with group testing. The application  
772 of group testing can significantly compress the size of crRNA libraries to facilitate  
773 combinatorial genetic screens, including in biological systems limited by assayable cell  
774 numbers, such as primary cells, organoids, and in vivo models. Group testing may be  
775 combined with concepts from compressed sensing (Yao et al. 2023; Cleary and Regev  
776 2020) to further enhance the efficiency of surveying combinatorial genetic perturbations  
777 for multidimensional phenotypic readouts (Adamson et al. 2016, 2018; Dixit et al. 2016;  
778 Wessels et al. 2023; Datlinger et al. 2017; Schraivogel et al. 2020; Replogle et al. 2020;  
779 Norman et al. 2019; Feldman et al. 2019).

780

781 A key parameter in group testing is the extent of potential signal dilution relative to  
782 individual testing. For Cas12a perturbations, signal dilution can arise from 1) low doses  
783 of ribonucleoprotein due to limitations in delivery, such as crRNA expression from  
784 single-copy integrations in pooled sequencing screens, or 2) increased multiplexing,  
785 which effectively dilutes the concentration of functional Cas12a protein available to bind  
786 each individual crRNA. Despite some signal dilution in the stringent setting of pooled  
787 screens using 6-plex crRNAs expressed from single-copy integrants (Fig. 4G and Fig.  
788 S20), multiAsCas12a-KRAB demonstrates sufficient potency to yield new biological  
789 insights into combinatorial cis-regulation at the MYC locus using pooled screening of  
790 6-plex crRNA arrays (Fig. 6C-D). While we have focused our optimizations to meet the  
791 stringent single-copy crRNA integration requirement of pooled screening formats,  
792 multiAsCas12a also significantly lowers technical barriers to higher-order combinatorial  
793 perturbations in array-based screening (Fig. 5B), which is compatible with more diverse  
794 phenotypic readouts and has recently improved significantly in throughput (Yin et al.  
795 2022). The assay format will likely influence the deliverable dose of synthetic  
796 components and thus the absolute upper limit of multiplexing for effective CRISPRi  
797 using multiAsCas12a-KRAB, which currently remains unclear. Among the spacers  
798 examined in the largest crRNA array we tested (10-plex), 3 spacers performed the  
799 same as each does in shorter arrays, while one showed substantially diminished

800 CRISPRi activity (Fig. 3H). Thus, there exists some unpredictability in how the  
801 pre-crRNA length, position within the array, and other sequence contexts might together  
802 influence the activities of specific crRNAs in the array. Predicting such context-specific  
803 influences on the performance of higher-order multiplexed crRNA arrays is an  
804 uncharted frontier that will likely improve the design of crRNA arrays to function robustly  
805 even in highly multiplexed and/or dose-limited applications. Such improvements in  
806 crRNA array activity prediction will further extend the scalability of combinatorial genetic  
807 screens by group testing. Implementing group testing would enable a single 10-plex  
808 crRNA array to indirectly screen up to  $2^{10} = 1,024$  crRNA combinations. Another area for  
809 improvement is that, despite already incorporating mutations that were previously  
810 reported in transient transfection experiments to enable non-canonical PAM targeting  
811 (Kleinstiver et al. 2019), multiAsCas12a-KRAB CRISPRi activity at those non-canonical  
812 PAM sites is generally much weaker than for the canonical TTTV PAM (Fig. 4C).  
813 Preference for the TTTV PAM enables targeting AT-rich genomic regions, but also limits  
814 the number of active crRNAs for GC-rich TSS-proximal regions. Compared to  
815 denAsCas12a-KRAB, multiAsCas12a-KRAB boosts the number of potent crRNAs per  
816 TSS, but further engineering may improve this further.

817

818 While we have focused on CRISPRi applications using the KRAB domain in the present  
819 study, the discovery and engineering of effector domains for chromatin perturbations by  
820 CRISPR-Cas is rapidly evolving. Recent advances include new repressive effectors  
821 (Alerasool et al. 2020; Mukund et al. 2023; Replogle et al. 2022b; DelRosso et al. 2023),  
822 activation effectors (Alerasool et al. 2022; Mukund et al. 2023; DelRosso et al. 2023;  
823 Griffith et al. 2023), and combination effectors for epigenetic memory (Nuñez et al.  
824 2021; Van et al. 2021; Nakamura et al. 2021; Amabile et al. 2016; O'Geen et al. 2022).  
825 We expect that multiAsCas12a can be flexibly combined with these and other effector  
826 domains to support group testing for many chromatin perturbation objectives. We  
827 envision multiAsCas12a and the group testing framework will enable elucidating and  
828 engineering combinatorial genetic processes underlying broad areas of biology at  
829 previously intractable scales.

830

### 831 **Author Contributions**

832 C.C.H. and L.A.G. conceived of and led the design of the overall study. C.C.H. wrote the  
833 paper incorporating input from L.A.G., C.M.W., J.C.C., J.S., and agreement from all  
834 authors. C.C.H. conceived of testing the R1226A mutation for CRISPRi applications,  
835 proposed the conceptual link to group testing, and led the design, execution, and  
836 computational analysis of all experiments, with contributions from others noted below.  
837 L.A.G. proposed the dose of lentivirally delivered CRISPR components as a key  
838 parameter for evaluation, interpreted results, and guided and obtained funding for the  
839 overall study. C.M.W. designed, executed, and analyzed quantification of indel

840 frequencies, and contributed to cloning and flow cytometry-based CRISPRi  
841 experiments. N.A.S. contributed to the execution of flow cytometry-based CRISPRi  
842 experiments, including all experiments in C4-2B cells, testing of higher-order crRNAs  
843 arrays, replicates of dose-response CRISPRi experiments, and enhancer CRISPRi  
844 experiments at the CD55 and MYC loci. R.D. contributed to cell line engineering and  
845 CRISPRi analysis of the DNase-dead mutant panel. Q.C. designed, executed, and  
846 analyzed all experiments testing truncated crRNAs, with guidance and funding obtained  
847 by J.S.. J.C.C. provided feedback on interpretations of the biophysics literature and  
848 proposed the entropic barrier to R-loop reversal upon severance of the non-target  
849 strand. S.M. contributed to crRNA cloning and cell culture. T.O. prepared 3' RNA-seq  
850 Illumina sequencing libraries. A.A. contributed to screen data processing and analysis  
851 for 3' RNA-seq. N.T. wrote scripts in Rust for screen read mapping and counting.

852

### 853 **Acknowledgements**

854 We thank Brian Yu and Khushali Patel for assistance in sequencing the indel analysis  
855 library for the KIT locus; April Pawluk for feedback on manuscript; Gavin Knott, Ashir  
856 Borah, Garrett Wong, James Nunez, Jonathan Weissman, Howard Chang, Patrick Hsu,  
857 Silvana Konermann, and the Gilbert Lab for helpful discussions.

858

### 859 **Funding**

860 C.C.H. is supported by the Physician Scientist Incubator, Dept. of Pathology, Stanford  
861 University School of Medicine and NIH NHGRI (K01HG012789). Q.C. and J.S. were  
862 supported by the Mark Foundation for Cancer Research. J.C.C. is a fellow of the Helen  
863 Hay Whitney Foundation. This work was funded in part by NIH (R01HG012227) and in  
864 part by GSK through an award to the UCSF Laboratory for Genomics Research to  
865 L.A.G.. L.A.G. is funded by the Arc Institute, NIH (DP2CA239597, UM1HG012660),  
866 CRUK/NIH (OT2CA278665 and CGCATF-2021/100006), a Pew-Stewart Scholars for  
867 Cancer Research award and the Goldberg-Benioff Endowed Professorship in Prostate  
868 Cancer Translational Biology. Sequencing of CRISPR screens and 3' RNA-seq libraries  
869 was performed at the UCSF CAT, supported by UCSF PBBR, RRP IMIA, and NIH  
870 1S10OD028511-01 grants. Sequencing of indel analysis at the KIT locus was performed  
871 at the Multi-omics Technology Center at the Arc Institute.

872

### 873 **Declaration of Interests**

874 C.C.H., C.M.W., R.D. and L.A.G. have filed patent applications related to  
875 multiAsCas12a. J.S. is a scientific consultant for Treeline Biosciences. L.A.G. has filed  
876 patents on CRISPRoff/on, CRISPR functional genomics and is a co-founder of Chroma  
877 Medicine.

878

### 879 **Methods**

880

## 881 **Plasmid Design and Construction**

882 A detailed table of constructs generated in this study will be provided as a Supplemental  
883 File with all sequences. Constructs will be made available on Addgene. Cloning was  
884 performed by Gibson Assembly of PCR amplified or commercially synthesized gene  
885 fragments (from Integrated DNA Technologies or Twist Bioscience) using NEBuilder Hifi  
886 Master Mix (NEB Cat# E262), and final plasmids sequence-verified by Sanger  
887 sequencing of the open reading frame and/or commercial whole-plasmid sequencing  
888 service provided by Primordium.

889

890 Protein constructs components:

891

892 The denAsCas12a open reading frame was PCR amplified from  
893 pCAG-denAsCas12a(E174R/S542R/K548R/D908A)-NLS(nuc)-3xHA-VPR (RTW776)  
894 (Addgene plasmid # 107943, from (Kleinstiver et al. 2019)). AsCas12a variants  
895 described were generated by using the denAsCas12a open reading frame as starting  
896 template and introducing the specific mutations encoded in overhangs on PCR primers  
897 that serve as junctions of Gibson assembly reactions. opAsCas12a is from (Gier et al.  
898 2020), available as Addgene plasmid # 149723, pRG232). 6xMyc-NLS was PCR  
899 amplified from pRG232. KRAB domain sequence from KOX1 was previously reported in  
900 (Gilbert et al. 2013). The lentiviral backbone for expressing Cas12a fusion protein  
901 constructs are expressed from an SFFV promoter adjacent to UCOE and is a gift from  
902 Marco Jost and Jonathan Weissman, derived from a plasmid available as Addgene  
903 188765. XTEN80 linker sequence was taken from (Nuñez et al. 2021) and was  
904 originally from (Schellenberger et al. 2009). For constructs used in piggyBac  
905 transposition, the open reading frame was cloned into a piggyBac vector backbone  
906 (Addgene #133568) and expressed from a CAG promoter. Super PiggyBac  
907 Transposase (PB210PA-1) was purchased from System Biosciences.

908

909 dAsCas12a-KRABx3 open reading frame sequence is from (Campa et al. 2019), in that  
910 study encoded within a construct referred to as SiT-ddCas12a-[Repr]. We generated  
911 SiT-ddCas12a-[Repr] by introducing the DNase-inactivating E993A by PCR-based  
912 mutagenesis using SiT-Cas12a-[Repr] (Addgene #133568) as template. Using Gibson  
913 Assembly of PCR products, we inserted the resulting ddCas12a-[Repr] open reading  
914 frame in-frame with P2A-BFP in a piggyBac vector (Addgene #133568) to enable direct  
915 comparison with other fusion protein constructs cloned in the same vector backbone  
916 (crRNA's are encoded on separate plasmids as described below).

917

918 Fusion protein constructs described in Fig. S8 were assembled by subcloning the  
919 protein-coding sequences of AsCas12a and KRAB into a lentiviral expression vector

920 using the In-Fusion HD Cloning system (TBUSA). AsCas12a mutants were cloned by  
921 mutagenesis PCR on the complete wildtype AsCas12a vector to generate the final  
922 lentiviral expression vector.

923

924 crRNA expression constructs:

925

926 Unless otherwise specified, individual single and 3-plex crRNA constructs were cloned  
927 into the human U6 promoter-driven expression vector pRG212 (Addgene 149722,  
928 originally from (Gier et al. 2020)). Library1, Library2, some 3-plex and all 4-plex, 5-plex,  
929 and 6-plex *As.* crRNA constructs were cloned into pCH67, which is derived from  
930 pRG212 by replacing the 3' DR with the variant DR8 (DeWeirdt et al. 2021). For  
931 constructs cloned into pCH67, the specific *As.* DR variants were assigned to each  
932 position of the array as follows, in 5' to 3' order:

933 3-plex: WT DR, DR1, DR3, DR8

934 4-plex: WT DR, DR1, DR10, DR3, DR8

935 5-plex: WT DR, DR1, DR16, DR10, DR3, DR8

936 6-plex: WT DR, DR1, DR16, DR18, DR10, DR3, DR8

937 8-plex: WT DR, DR1, DR16, DR\_NS1, DR17, DR18, DR10, DR3, DR8

938 10-plex: WT DR, DR1, DR16, DR\_NS1, DR4, DR\_NS2, DR17, DR18, DR10, DR3, DR8

939

940 Where the sequences of DR\_NS1 and 2 were based on combining hits from the variant  
941 DR screen from DeWeirdt et al., 2020. The sequences are DR\_NS1:

942 aattcctcctctggaggt, and DR\_NS2: aattcctcctataggaggt.

943

944 1-plex,3-plex, 8-plex, and 10-plex crRNA constructs were cloned by annealing  
945 complementary oligos, phosphorylation by T4 polynucleotide kinase (NEB M0201S),  
946 and ligated with T4 DNA ligase (NEB M0202) into Bsmbl site of vector backbones.

947 4-plex, 5-plex and 6-plex crRNA arrays were ordered as double-stranded gene  
948 fragments and cloned into the Bsmbl site of vector backbones by Gibson Assembly.

949

### 950 **Design of individual crRNAs**

951 For cloning individual crRNA constructs targeting TSS's, CRISPick was used in the  
952 enAsCas12a CRISPRi mode to design spacers targeting PAM's located within -50bp to  
953 +300bp region around the targeted TSS. We manually selected spacers from the  
954 CRISPick output by picking TTTV PAM-targeting spacers (except for crCD151-3, which  
955 targets a non-canonical GTTC PAM) with the highest On-Target Efficacy Scores and  
956 generally excluded any spacers with high off-target predictions. The same non-targeting  
957 spacer was used throughout the individual well-based experiments and was randomly  
958 generated and checked for absence of alignment to the human genome by BLAT (Kent  
959 2002).



960 The hg19 genomic coordinates for MYC enhancers are: e1  
961 chr8:128910869-128911521, e2 chr8:128972341-128973219, and e3  
962 chr8:129057272-129057795. DNA sequences from those regions were downloaded  
963 from the UCSC Genome Browser and submitted to CRISPick. The top 3 spacers  
964 targeting TTTV PAM's for each enhancer were picked based on CRISPick On-target  
965 Efficacy Score, having no Tier I or Tier II Bin I predicted off-target sites, and proximity to  
966 the zenith of the ENCODE DNase hypersensitivity signal in K562 cells.

967

### 968 **Cell culture, lentiviral production, lentiviral transduction**

969 All cell lines were cultured at 37deg. C with 5% CO2 in tissue culture incubators. K562  
970 and C4-2B cells were maintained in RPMI-1640 (Gibco cat# 22400121) containing 25  
971 mM HEPES, 2mM L-glutamine, and supplemented with 10% FBS (VWR), 100 units/mL  
972 streptomycin, and 100 mg/mL penicillin. For pooled screens using K562 cells cultured in  
973 flasks in a shaking incubator, the culture media was supplemented with 0.1% Pluronic  
974 F-127 (Thermo Fisher P6866).

975

976 HEK 293T cells were cultured in media consisting of DMEM, high glucose (Gibco  
977 11965084, containing 4.5g/mL glucose and 4mM L-glutamine) supplemented with 10%  
978 FBS (VWR) and 100units/mL streptomycin, 100mg/mL penicillin. Adherent cells are  
979 routinely passaged and harvested by incubation with 0.25% Trypsin-EDTA (Thermo  
980 Fisher 25200056) at 37deg. C for 5-10min, followed by neutralization with media  
981 containing 10% FBS.

982

983 Unless otherwise specified below, lentiviral particles were produced by transfecting  
984 standard packaging vectors into HEK293T using TransIT-LT1 Transfection Reagent  
985 (Mirus, MIR2306). At <24 hours post-transfection culture media with exchanged with  
986 fresh media supplemented with ViralBoost (Alstem Bio, cat# VB100) at 1:500 dilution.  
987 Viral supernatants were harvested ~48-72 hours after transfection and filtered through a  
988 0.45 mm PVDF syringe filter and either stored in 4deg. C for use within <2 weeks or  
989 stored in -80deg. C until use. Lentiviral infections included polybrene (8 mg/ml).

990

991 For experiments described in Fig. S8, lentivirus was produced by transfecting HEK293T  
992 cells with lentiviral vector, VSVG and psPAX2 helper plasmids using polyethylenimine.  
993 Media was changed ~6–8 h post transfection. Viral supernatant was collected every 12  
994 h for 5 times and passed through 0.45 µm PVDF filters. Lentivirus was added to target  
995 cell lines with 8 µg/mL Polybrene and centrifuged at 650 × g for 25 min at room  
996 temperature. Media was replaced 15 h post infection. Antibiotics (1 µg/mL puromycin)  
997 was added 48 h post infection.

998

### 999 **Antibody staining and flow cytometry**

1000

1001 Antibodies used: CD55-APC (Biolegend 311312), CD81-PE (Biolegend 349506),  
1002 B2M-APC (Biolegend 316311), KIT-PE (Biolegend 313204), FOLH1-APC (Biolegend  
1003 342508), CD56(NCAM1)-APC (Invitrogen 17-0567-42). Cells were stained with  
1004 antibodies in 96-well plates, using 500g 5min at 4deg. C for centrifugation steps and  
1005 decanting in between each step. Cells were washed once with 200ul with FACS Buffer  
1006 (PBS with 1% BSA), then resuspended in 50ul of antibodies diluted at 1:100 in FACS  
1007 Buffer for 30min at 4deg. C. Then 150ul of FACS Buffer was added, followed by  
1008 centrifugation and supernatant, then washed one more time with 200ul FACS buffer,  
1009 followed by final resuspension in 200ul FACS Buffer for flow cytometry. For CRISPRi  
1010 experiments, all data points shown in figures are events first gated for single cells based  
1011 on FSC/SSC, then gated on GFP-positivity as a marker for cells successfully  
1012 transduced with crRNA construct. Flow cytometry was performed on the Attune NxT  
1013 instrument unless otherwise specified.

1014

1015 For cell fitness competition assays, the percentage of cells expressing the GFP marker  
1016 encoded on the crRNA expression vector is quantified by flow cytometry. log2 fold  
1017 change of % GFP-positive cells was calculated relative to day 2 (for experiments  
1018 targeting the Rpa3 locus in Fig. S8) or day 6 (for experiments targeting the MYC locus  
1019 in Fig. 6B). For experiments targeting the Rpa3 locus, flow cytometry was performed on  
1020 the Guava EasyCyte 10 HT instrument.

1021

### 1022 **Indel analysis**

1023 200K cells were collected on day 14 after crRNA transduction and genomic DNA was  
1024 isolated using NucleoSpin Blood (Macherey-Nagel, Catalog no. 740951.50). Briefly,  
1025 PCRs for loci of interest were run using Amplicon-EZ (Genewiz) partial Illumina  
1026 adapters and amplicons were processed using NucleoSpin Gel and PCR Clean-up Kit  
1027 (Macherey-Nagel, Catalog no. 740609.250). Paired end (2 x 250 bp) sequencing was  
1028 completed at GENEWIZ (Azenta Life Sciences). Raw fastq files were obtained from  
1029 GENEWIZ and aligned to reference sequences using *CRISPResso2* (Clement *et al.*  
1030 2019) with the following modifications:

1031 --quantification\_window\_size 12

1032 --quantification\_window\_center -3

1033 CRISPResso --fastq\_r1 R1.fastq.gz --fastq\_r2 R2.fastq.gz --amplicon\_seq

1034 acccgtctgtttgtcccacccttggtgacgcagagccccagcccagacccccgcccagcactcatttaactggtattgcg

1035 gagccacgaggcttctgcttactgcaactcgtccgcccgtggcgtagctgcgactcggcggagtcccggcggcgcg

1036 tcctgttctaaccggcgcgccatgaccgtcgcgcccagcgtgcccgcggcgctgcccctctcggggagctgccc

1037 cggctgctgctgctggtgctgttgctgctgcccggccgtgtggggtagtagggcccggcgccggggaagcccctggg

1038 ctgggtgggaggtccaagtgcgtctctgaga -g actggtattgaggagccacgagg -wc -3 -w 12

1039

1040 For crRNA constructs in which the PAM is found on the opposite strand with respect to  
1041 the amplicon sequence (in this case, CD81) the following modifications were included:

1042 --quantification\_window\_size 20

1043 --quantification\_window\_center -18

1044 CRISPResso --fastq\_r1 pCH45H-CD81-array\_S5\_L001\_R1\_001.fastq.gz --fastq\_r2

1045 pCH45H-CD81-array\_S5\_L001\_R2\_001.fastq.gz --amplicon\_seq

1046 ctgcttcgcggggacgaggggggggctcgcgggcgggactcctggcgccccgccccatgagctcatcaagagccgc

1047 cgcccctggatggtggggcgggggcgcacactttgccggaggtggggcgatccgcctcactcttcccagcccagct

1048 cactctccaatctgcggtcaccacccgagaccttctgggggtcgcgcctaaaaggagcgcagactcccgccgggatgg

1049 ccagaagctgggtgcgcgaccctggccgtccctgctgggagccgatctccctctctcaccagacacgttccagc

1050 ggaggcctctccagaagggtctggaggcctcgcaggagtggggatcccgcggttctgagttgg -p 3 -g

1051 gagaccttctgggggtcgcgcc -wc -18 -w 20

1052

1053 Quantification diagrams were generated in R.

1054

1055 For analysis of dual cutting at the *KIT* TSS, briefly, DNA was isolated using QuickExtract

1056 DNA Solution (Lucigen) and amplicons were generated using 15 cycles of PCR to

1057 introduce Illumina sequencing primer binding sites and 0-8 staggered bases to ensure

1058 library diversity. After reaction clean-up using ExoSAP-IT kit (Thermo Fisher 78201), an

1059 additional 15 cycles of PCR was used to introduce unique dual indices and Illumina P5

1060 and P7 adaptors. Libraries were pooled and purified by SPRIselect magnetic beads

1061 before paired-end sequencing using an Illumina MiSeq. Sequencing primer binding sites,

1062 unique dual indices (from Illumina TruSeq kits), P5 and P7 adaptor sequences are from

1063 Illumina Adaptor Sequences Document # 100000002694 v16.

1064

1065 Reads were analyzed using CRISPRessoBatch from CRISPResso2 (Clement et al.

1066 2019) with the following modifications: wc -4 -w 15

1067 CRISPRessoBatch --batch\_settings batch2.batch --amplicon\_seq

1068 aagagcaggggcccagacgCCGCCGGGAAGAAGCGAGACCCGGGCGGGCGCGAGGGAGG

1069 GGAGGCGAGGAGGGGCGTGGCCGGCGCGCAGAGGGAGGGCGCTGGGAGGAGG

1070 GGCTGCTGCTCGCCGCTCGCGGCTCTGGGGGCTCGGCTTTGCCGCGCTCGCTGCA

1071 CTTGGGCGAGAGCTGGAACGTGGACCAGAGCTCGGATCCCATCGCAGCTACCGCG

1072 ATGAGAGGCGCTCGCGGCGCCTGGGATTTTCTCTGCGTTCTGCTCCTACTGCTTCG

1073 CGTCCAGACAGGTGGGACACCGCGGCTGGCACCCCGACCGTGcgactactcggcgaagcc

1074 tgtg -p 3 -g TCTGCGTTCTGCTCCTACTGCTT -wc -4 -w 15

1075 For dual gRNA cutting, both guides were included in the batch analysis. The total number  
1076 of insertions and deletions at each amplicon position were calculated and displayed  
1077 using the effect\_vector\_combined.txt output.

1078

1079 Frequencies of nucleotide substitutions with multiAsCas12a-KRAB targeting are  
1080 negligible and indistinguishable from sequencing error ( $\leq 4.5\%$ ) observed in unmodified  
1081 K562 cells.

1082

1083

#### 1084 **Simulations of indel impacts on gene expression**

1085

1086 The fraction of reads containing indels within each specified region was subjected to  
1087 technical noise background subtraction by the fraction of reads containing indels  
1088 observed in K562 parental cells. This background-subtracted indel allelic frequency was  
1089 used to calculate per-copy deletion probabilities in Fig. S14B and Fig. S15B. For  
1090 denAsCas12a-KRAB this background-subtraction can result in a small negative value  
1091 and in those cases 0% is reported as per-copy deletion probability.

1092

1093 We simulated the impact of indels on gene expression under the assumption that gene  
1094 expression changes are entirely driven by indels generated by the given AsCas12a  
1095 fusion protein at the crRNA target site. A prior study reported at one Cas9 target site  
1096 that the frequency of larger ( $>250\text{bp}$ ) indels is  $\sim 20\%$  relative to the smaller ( $<250\text{bp}$ )  
1097 indels. This 20:80 ratio of unobserved-to-observed indels is very likely a high  
1098 overestimate in our case because our PCR amplicons are 340bp-382bp and thus are  
1099 expected to capture a large fraction of even the  $>250\text{bp}$  indels. Nevertheless we added  
1100 an additional 20% to the observed indel frequencies to arrive at our final estimates of  
1101 probability of the occurrence of any  $\geq 1\text{bp}$  indels per DNA copy for a single target site.  
1102 Based on this indel probability we calculated the proportion of cell population expected  
1103 to harbor a given number of DNA copies with indels assuming indels occur  
1104 independently among DNA copies and using previously measured DNA copy number  
1105 for each genomic locus (Zhou et al. 2019). For dual targeting of the KIT locus by crKIT-2  
1106 and crKIT-3 we assume that the occurrence of a large ( $>250\text{bp}$ ) unobserved deletion at  
1107 one target site precludes a deletion at the other target site. Starting from the single-cell  
1108 expression distributions obtained by flow cytometry from the non-targeting crRNA  
1109 control, we simulated the expected change in single-cell expression distribution under  
1110 the assumption that any  $\geq 1\text{bp}$  indel in the PCR amplicon would generate a null allele  
1111 completely abolishing expression of the target gene in cis (i.e. indel in 1 out of 3 copies  
1112 would reduce expression by 33%). We refer to this as the "expected null" expression  
1113 change, which is expected to be a high overestimate of impact on expression. To better  
1114 more accurately estimate the true hypomorphic effects of indels we calculated a

1115 "hypomorphic coefficient" defined as the ratio of the observed median expression  
1116 change vs. the expected null expression change for opAsCas12a. We multiply the  
1117 expected null expression change for all other fusion proteins by this hypomorphic  
1118 coefficient to derive an "expected hypomorph" expression change for each fusion  
1119 protein and crRNA construct combination.

1120

1121

## 1122 **Pooled crRNA library design**

1123

1124 For all crRNAs in Library 1 and Library 2: we excluded in the analysis spacers with the  
1125 following off-target prediction criteria using CRISPick run in the CRISPRi setting: 1)  
1126 off-target match = 'MAX' for any tier or bin, or 2) # Off-Target Tier I Match Bin I Matches  
1127 > 1). The only crRNAs for which this filter was not applied are the non-targeting negative  
1128 control spacers, which do not have an associated CRISPick output. All crRNA  
1129 sequences were also filtered to exclude Bsmbl sites used for cloning and >3  
1130 consecutive T's, which mimic RNA Pol III termination signal.

1131

### 1132 Library 1 (single crRNA's)

1133 To design crRNA spacers targeting gene TSS's for Library 1, we used the -50bp to  
1134 +300bp regions of TSS annotations derived from capped analysis of gene expression  
1135 data and can include multiple TSS's per gene (Horlbeck et al. 2016a). We targeted the  
1136 TSS's of 559 common essential genes from DepMap with the strongest cell fitness  
1137 defects in K562 cells based on prior dCas9-KRAB CRISPRi screen (Horlbeck et al.  
1138 2016a). We used CRISPick with enAsCas12a settings to target all possible PAM's  
1139 (TTTV and non-canonical) in these TSS-proximal regions. Except for the criteria  
1140 mentioned in the previous paragraph, no other exclusion criteria were applied. For the  
1141 TSS-level analyses shown in Fig. 4D-E, each gene was assigned to a single TSS  
1142 targeted by the crRNA with the strongest fitness score for that gene.

1143

1144 Negative controls in Library 1 fall into two categories: 1) intergenic negative controls,  
1145 and 2) non-targeting negative controls. Target sites for intergenic negative controls were  
1146 picked by removing all regions in the hg19 genome that are within 10kb of annotated  
1147 ensembl genes (retrieved from biomaRt from <https://grch37.ensembl.org>) or within 3kb  
1148 of any ENCODE DNase hypersensitive site (wgEncodeRegDnaseClusteredV3.bed from  
1149 <http://hgdownload.cse.ucsc.edu/goldenpath/hg19/encodeDCC/wgEncodeRegDnaseClu>  
1150 [stered/](#)). The remaining regions were divided into 1kb fragments. 90 such 1kb  
1151 fragments were sampled from each chromosome. Fragments containing  $\geq 20$   
1152 consecutive N's were removed. The remaining sequences were submitted to CRISPick  
1153 run under CRISPRi settings. The CRISPick output was further filtered for spacers that  
1154 meet these criteria: 1) off-target prediction criteria described in the beginning of this

1155 section, and 2) On-target Efficacy Score  $\geq 0.5$  (the rationale is to maximize  
1156 representation by likely active crRNAs to bias for revealing any potential cell fitness  
1157 effects from non-specific genotoxicity due to residual DNA cutting by  
1158 multiCas12a-KRAB), 3) mapping uniquely to the hg19 genome by Bowtie (Langmead et  
1159 al. 2009) using '-m 1' and otherwise default parameters, 3) filtered once more against  
1160 those whose uniquely mapped site falls within 10kb of annotated ensembl genes or any  
1161 ENCODE DNase hypersensitive site.

1162

1163 Non-targeting negative control spacers were generated by combining 1) non-targeting  
1164 negative controls in the Humagne C and D libraries, 2) taking 20nt non-targeting  
1165 spacers from the dCas9-KRAB CRISPRi\_v2 genome-wide library (Horlbeck et al.  
1166 2016a), removing the G in the 1st position, and appending random 4-mers to the 3' end.  
1167 This set of spacers were then filtered for those that do not map to the hg19 genome  
1168 using Bowtie with default settings.

1169

#### 1170 Library 2 (6-plex crRNA's)

1171

1172 Sublibrary A (84,275 constructs): Test position spacers were encoded at each position  
1173 of the 6-plex array, with remaining positions referred to as context positions and filled  
1174 with negative control spacers. Test positions encodes one of 506 intergenic negative  
1175 control spacers and 2,303 essential TSS-targeting spacers. The essential TSS-targeting  
1176 spacers were selected from among all spacers targeting PAM's within -50bp to +300bp  
1177 TSS-proximal regions of 50 common essential genes with the strongest K562 cell  
1178 fitness defect in prior dCas9-KRAB CRISPRi screen (Horlbeck et al. 2016a), and must  
1179 have  $\geq 0.7$  CRISPRi On-target Efficacy Score. Negative control context spacers consist  
1180 of 5 6-plex combinations, 3 of these combinations consist entirely of non-targeting  
1181 negative controls and 2 of the combinations consist entirely of intergenic negative  
1182 controls.

1183

1184 Sublibrary B (6,370 constructs): crRNA combinations targeting cis-regulatory elements  
1185 at the MYC locus were assembled from a subset of combinations possible from 15  
1186 starting spacers (3 targeting MYC TSS, 3 targeting each of 3 enhancers, and 3  
1187 intergenic negative control spacers). The 3 enhancer elements are described in the  
1188 subsection "Design of individual crRNAs." These 15 starting spacers were grouped into  
1189 5 3-plex combinations, each 3-plex combination exclusively targeting one of the 4  
1190 cis-regulatory elements, or consisting entirely of intergenic negative controls. Each  
1191 3-plex was then encoded in positions 1-3 of 6-plex arrays, and positions 4-6 were filled  
1192 with all possible 3-plex combinations chosen from the starting 15 spacers. All 6-plex  
1193 combinations were also encoded in the reverse order in the array.

1194

1195 All-negative control constructs (2000 constructs): 1500 6-plex combinations were  
1196 randomly sampled from the intergenic negative control spacers described for Library 1.  
1197 500 6-plex combinations were randomly sampled from non-targeting negative control  
1198 spacers described for Library 1.

1199

1200 Intergenic negative controls and non-targeting negative controls are defined the same  
1201 as in Library 1.

1202

### 1203 **crRNA library construction**

1204

1205 For Library 1, ~140 fmol of pooled oligo libraries from Twist were subjected to 10 cycles  
1206 of PCR amplification using primers specific to adaptor sequences flanking the oligos  
1207 and containing Bsmbl sites. The PCR amplicons were cloned into a crRNA expression  
1208 backbone (pCH67) by Golden Gate Assembly with ~1:1 insert:backbone ratio using  
1209 ~500 fmol each. Golden Gate Assembly reaction was carried out in a 100ul reaction  
1210 containing 2.5U Esp3I (Thermo ER0452) and 1000U T4 DNA Ligase in T4 DNA Ligase  
1211 reaction buffer (NEB M0202L). The reaction mix was incubated for 31 cycles alternating  
1212 between 37deg. C and 16deg. C for 20min at each temperature, then heat-inactivated  
1213 at 65deg. C for 5min. Assembly reactions were column purified with Zymo DNA clean  
1214 and concentrator-5 (Zymo D4004), eluted in 12ul of water and <7ul added to 70ul of  
1215 MegaX DH10B T1R Electrocomp Cells (C640003) for electroporation using BioRad  
1216 Gene Pulser Xcell Electroporator with settings 2.0kV, 200ohms, 25µF. Cells were  
1217 recovered at 37deg. C for rotating for 1h in ~5ml recovery media from the MegaX  
1218 DH10B T1R Electrocomp Cells kit and small volumes plated onto bacterial LB plates  
1219 containing carbenicillin for quantification of colony forming units. The remaining  
1220 recovery culture was inoculated directly into 200ml liquid LB media with carbenicillin and  
1221 incubated in 37deg. C shaker for 12h-16h prior to harvesting for plasmid purification  
1222 using ZymoPURE II Plasmid Midiprep kit (Zymo D4200). Based on the colony forming  
1223 units from the small volumes in the bacterial plates, the estimated coverage of the  
1224 library is 778x. 24 individual colonies were verified by Sanger sequencing and the  
1225 library subjected to deep sequencing as described in Illumina sequencing library  
1226 preparation. For Library 2, 915 fmol of pooled oligo libraries from Twist was subjected to  
1227 18 cycles of PCR amplification and agarose gel purification of the correctly sized band  
1228 before proceeding similarly with the remainder of the protocol as described above. The  
1229 estimated coverage of the library from colony forming units is ~60x.

1230

### 1231 **Illumina sequencing library preparation**

1232 crRNA inserts were amplified from genomic DNA isolated from screens using 16 cycles  
1233 of first round PCR using pooled 0-8nt staggered forward and reverse primers, treated  
1234 with ExoSAP-IT (Thermo Fisher 78201.1.ML), followed by second round of PCR to

1235 introduce Illumina unique dual indices and adaptors. Sequencing primer binding sites,  
1236 unique dual indices, P5 and P7 adaptor sequences are from Illumina Adaptor  
1237 Sequences Document # 1000000002694 v16. PCR amplicons were subject to size  
1238 selection by magnetic beads (SPRIselect, Beckman B23318) prior to sequencing on an  
1239 Illumina NovaSeq6000 using SP100 kit for Library 1 or SP500 kit for Library 2.  
1240 Sequencing of plasmid libraries were performed similarly, except 7 cycles of  
1241 amplification were each used for Round 1 and Round 2 PCR. The size distribution of  
1242 the final library was measured on an Agilent TapeStation system. We noted that even  
1243 after magnetic bead selection of Round 2 PCR-amplified Library 2 plasmid library  
1244 (colonies from which were Sanger sequencing verified) and genomic DNA from  
1245 screens, smaller sized fragments from non-specific PCR amplification during Illumina  
1246 sequencing library preparation persisted. This might contribute to the fraction of reads  
1247 that could not be mapped to our reference 6-plex array. Thus, these unmapped reads  
1248 do not necessarily reflect recombination of the crRNA library constructs, though the  
1249 latter could contribute as well.

1250

1251

### 1252 **Cell fitness screens**

1253 Library 1 screen: K562 cells engineered by piggyBac transposition to constitutively  
1254 express denAsCas12a-KRAB or multiAsCas12a-KRAB were transduced with lentivirally  
1255 packaged Library 1 constructs at MOI = ~0.15. Transduced cells were then selected  
1256 using 1ug/ml puromycin for 2 days, followed by washout of puromycin. On Day 6 after  
1257 transduction, initial (T0) time point was harvested, and the culture was split into 2  
1258 replicates that are separately cultured henceforth. 10 days later (T10), the final time  
1259 point was harvested (8.6 total doublings for multiAsCas12a-KRAB cells, 9.15 total  
1260 doublings for denasCas12a-KRAB cells). A cell coverage of >500x was maintained  
1261 throughout the screen. Library 2 screen: K562 cells engineered by piggyBac  
1262 transposition to constitutively express multiAsCas12a-KRAB were transduced with  
1263 lentivirally packaged Library 2 constructs at MOI = ~0.15. The screen was carried out  
1264 similarly as described for Library 1 screen, except the screen was carried out for 14  
1265 days (T14) or 13.5 total doublings and maintained at a cell coverage of >2000x  
1266 throughout. Genomic DNA was isolated using the NucleoSpin Blood XL Maxi kit  
1267 (Machery-Nagel 740950.50).

1268

### 1269 **Screen data processing and analysis**

1270

1271 Summary of library contents are in Fig. S17.

1272



1273 Library 1: Reads were mapped to crRNA constructs using sgcount  
1274 (<https://noamteyssier.github.io/sgcount/>), requiring perfect match to the reference  
1275 sequence.

1276

1277 Library 2: First, reference construct sequences were created by interspersing provided  
1278 spacer and constant regions. Each construct is then given a unique construct id (CID).  
1279 Each CID is then split into R1 and R2 reference sequences, which are constructed by  
1280 taking the first three and last three spacer-construct pairs of the reference sequence  
1281 respectively. The R2 sequence is then reverse complemented for matching against the  
1282 R2 sequencing reads. Next, two hashmaps are created for the R1 and R2  
1283 spacer-construct pairs respectively, which map the R1/R2 sequences to a set of  
1284 corresponding CIDs. Finally, for each R1/R2 sequencing pair, each k-mer (k = length of  
1285 R1/R2 respective construct sequence) in the sequence is mapped against their  
1286 respective R1/R2 hashmap. If both sequencing pairs are able to be mapped to a CID  
1287 set, then the intersection of their sets is their original construct, and the total count of  
1288 that CID is incremented. We implemented the above algorithm as the `casmap  
1289 constructs` command in a package written in Rust, available at  
1290 <https://github.com/noamteyssier/casmap>.

1291

1292 Starting from read counts, the remainder of analyses were performed using custom  
1293 scripts in R. Constructs that contained <1 read per million reads (RPM) aligned to the  
1294 reference library in either replicates at T0 were removed from analysis. From the  
1295 constructs that meet this read coverage threshold, a pseudocount of 1 was added for  
1296 each construct and the RPM re-calculated and used to obtain a fitness score  
1297 (Kampmann et al. 2013):

$$1298 \gamma = \log_2 \left( \frac{(RPM_{final}/negctrl_{median}RPM_{final})}{(RPM_{initial}/negctrl_{median}RPM_{initial})} \right) / totaldoublings,$$

1299 where RPM = read count per million reads mapped to reference (initial = at T0, final = at  
1300 end of screen), negctrlmedian = median of RPM of intergenic negative control  
1301 constructs, totaldoublings = total cell population doublings in the screen. For Library 1,  
1302 data from a single T0 sample was used to calculate the fitness score for both replicates  
1303 due to an unexpected global loss of sequencing read counts for one of two originally  
1304 intended T0 replicate samples.

1305

### 1306 **3' RNA-seq experiment and data analysis**

1307

#### 1308 *Experimental procedure*

1309

1310 3' RNA-seq was performed as part of a batch processed using a QuantSeq-Pool  
1311 Sample-Barcoded 3' mRNA-Seq Library Prep Kit for Illumina (Lexogen cat#139) in  
1312 accordance with the manufacturer's instructions. Briefly, 10 ng of each purified input

1313 RNA was used for first strand cDNA synthesis with an oligo(dT) primer containing a  
1314 sample barcode and a unique molecular identifier. Subsequently, barcoded samples  
1315 were pooled and used for second strand synthesis and library amplification. Amplified  
1316 libraries were sequenced on an Illumina HiSeq4000 with 100 bp paired-end reads. The  
1317 QuantSeq Pool data was demultiplexed and preprocessed using an implementation of  
1318 pipeline originally provided by Lexogen  
1319 ([https://github.com/Lexogen-Tools/quantseqpool\\_analysis](https://github.com/Lexogen-Tools/quantseqpool_analysis)). The final outputs of this step  
1320 are gene level counts for all samples (including samples from multiple projects  
1321 multiplexed together).

1322

### 1323 *Gene level and differential expression analysis*

1324

1325 For generating scatter plots, normTransform function from DESeq2 (Love et al. 2014)  
1326 used to normalize the raw counts and then a pseudocount of 1 added, and  
1327 log<sub>2</sub>-transformed. The output was plotted in R as scatter plots.

1328

1329 For differential expression analysis, DESeq2 (version 1.34) default Wald-test was used  
1330 to compare each targeting construct (one replicate) with non-targeting samples (two  
1331 replicates). We calculated log<sub>2</sub> transformed TPM counts and applied the threshold of  
1332 6.5 to eliminate genes with low expression. Using ggplot2, volcano plots visualized in R  
1333 are then displayed for genes with log<sub>2</sub>FoldChange above or below 2.055 and p-values  
1334 smaller than 0.01. The log<sub>2</sub>FoldChange cutoff was based on visually examining the  
1335 concordance between two replicates of untransduced controls and manually identifying  
1336 a threshold below which the log<sub>2</sub>FoldChange are poorly correlated between the  
1337 replicates of the untransduced control.

1338

### 1339 *Off-target analysis of spacers*

1340

1341 To evaluate potential off-target effect of spacers, we used the crisprVerse (version 1.0.0)  
1342 (Hoberecht et al. 2022) and  
1343 crisprBowtie (version 1.2.0) together with other R packages including GenomicRanges  
1344 (version 1.50) (Lawrence et al. 2013) and tidyverse (version 1.3.2) (Wickham et al.  
1345 2019). First, we defined dictionary of spacers as  
1346 "TCCTCCAGCATCTTCCACATTCA":"HBG-2",  
1347 "TTCTTCATCCCTAGCCAGCCGCC":"HBG-3",  
1348 "CTTAGAAGGTTACACAGAACCAG":"HS2-1",  
1349 "TGTGTAACCTTCTAAGCAAACCT":"HS2-2",  
1350 "AGGTGGAGTTTTAGTCAGGTGGT":"HS2-3",  
1351 "ATTAAGTATGCGTAAGGAGATC":"NT-3". Then, `runCrisprBowtie` function used with  
1352 these parameters: `crisprNuclease` as `enAsCas12a`, `n\_mismatches` equal 3,

1353 `canonical` equal FALSE, and `bowtie\_index` as a path to folder including pre-indexed  
1354 hg38 reference genome. Thus, the results from this step allows us to assess our  
1355 previously designed spacers and annotate potential off-target loci in the human  
1356 genome. To annotate results, we used reference annotation GENCODE (version 34)  
1357 (Frankish et al. 2021) and we defined pam\_site +/- 2500 bp for each predicted off-target  
1358 to overlap them with matched transcription start sites (TSS) +/- 1000 bp of all annotated  
1359 genes. Results shown as annotated tables.

1360

### 1361 **RT-qPCR**

1362 For the CRISPRi experiments targeting the HBG TSS or HS2 enhancer, K562 cells  
1363 engineered (by lentiviral transduction at MOI ~5) for constitutive expression of  
1364 multiAsCas12a-KRAB were transduced with crRNAs and sorted, followed by  
1365 resuspension of ~200k to 1 million cells in 300ul RNA Lysis Buffer from the Quick-RNA  
1366 Miniprep Kit (Zymo R1055) and stored in -70deg. C. RNA isolation was performed  
1367 following the kit's protocols, including on-column DNase I digestion. 500ng of RNA was  
1368 used as input for cDNA synthesis primed by random hexamers using the RevertAid RT  
1369 Reverse Transcription Kit (Thermo fisher K1691), as per manufacturer's instructions.  
1370 cDNA was diluted 1:4 with water and 2ul used as template for qPCR using 250nM  
1371 primers using the SsoFast EvaGreen Supermix (BioRad 1725200) on an Applied  
1372 Biosystems ViiA 7 Real Time PCR System. Data was analyzed using the ddCT method,  
1373 normalized to GAPDH and no crRNA sample as reference.

1374

### 1375 **Transient transfection experiments**

1376 For co-transfection experiments, transfections were performed similar to prior study  
1377 (Campa et al. 2019). Briefly, the day before transfection, 100,000 HEK293T cells were  
1378 seeded into wells of a 24 well plate. The following day, we transiently transfected 0.6µg  
1379 of each protein construct and 0.3µg gRNA construct per well (in duplicate) in Mirus  
1380 TransIT-LT1 transfection reagent according to manufacturer's instructions. Mixtures  
1381 were incubated at room temperature for 30 minutes and then added in dropwise fashion  
1382 into each well. 24 hours after transfection, cells were replenished with fresh media. 48  
1383 hours after transfection, BFP and GFP positive cells (indicative of successful delivery of  
1384 protein and crRNA constructs) were sorted (BD FACSAria Fusion) and carried out for  
1385 subsequent flow-cytometry experiments.

1386

### 1387 **Data access and availability**

1388 Tables of all sequence and read counts are included as Supplementary Files. Plasmids  
1389 will be made available on Addgene. Engineered cell lines will be made available upon  
1390 request.

1391

1392

## 1393 **References**

1394

1395 Adamson B, Norman TM, Jost M, Cho MY, Nuñez JK, Chen Y, Villalta JE, Gilbert LA,  
1396 Horlbeck MA, Hein MY, et al. 2016. A Multiplexed Single-Cell CRISPR Screening  
1397 Platform Enables Systematic Dissection of the Unfolded Protein Response. *Cell*  
1398 **167**: 1867–1882.e21.

1399 Adamson B, Norman TM, Jost M, Weissman JS. 2018. Approaches to maximize  
1400 sgRNA-barcode coupling in Perturb-seq screens. *bioRxiv* 298349.  
1401 <https://www.biorxiv.org/content/10.1101/298349v1> (Accessed October 7, 2019).

1402 Aguirre AJ, Meyers RM, Weir BA, Vazquez F, Zhang C-Z, Ben-David U, Cook A, Ha G,  
1403 Harrington WF, Doshi MB, et al. 2016. Genomic Copy Number Dictates a  
1404 Gene-Independent Cell Response to CRISPR/Cas9 Targeting. *Cancer Discov* **6**:  
1405 914–929.

1406 Alerasool N, Leng H, Lin Z-Y, Gingras A-C, Taipale M. 2022. Identification and functional  
1407 characterization of transcriptional activators in human cells. *Mol Cell* **82**:  
1408 677–695.e7.

1409 Alerasool N, Segal D, Lee H, Taipale M. 2020. An efficient KRAB domain for CRISPRi  
1410 applications in human cells. *Nat Methods* **17**: 1093–1096.

1411 Amabile A, Migliara A, Capasso P, Biffi M, Cittaro D, Naldini L, Lombardo A. 2016.  
1412 Inheritable Silencing of Endogenous Genes by Hit-and-Run Targeted Epigenetic  
1413 Editing. *Cell* **167**: 219–232.e14.

1414 Baranello L, Levens D, Gupta A, Kouzine F. 2012. The importance of being supercoiled:  
1415 how DNA mechanics regulate dynamic processes. *Biochim Biophys Acta* **1819**:  
1416 632–638.

1417 Basu VP, Song M, Gao L, Rigby ST, Hanson MN, Bambara RA. 2008. Strand transfer  
1418 events during HIV-1 reverse transcription. *Virus Res* **134**: 19–38.

1419 Blayney J, Francis H, Camellato B, Mitchell L, Stolper R, Boeke J, Higgs D, Kassouf M.  
1420 2022. Super-enhancers require a combination of classical enhancers and novel  
1421 facilitator elements to drive high levels of gene expression. *bioRxiv*  
1422 2022.06.20.496856.  
1423 <https://www.biorxiv.org/content/10.1101/2022.06.20.496856v1.full> (Accessed June  
1424 29, 2022).

1425 Blobel GA, Higgs DR, Mitchell JA, Notani D, Young RA. 2021. Testing the  
1426 super-enhancer concept. *Nat Rev Genet* **22**: 749–755.

1427 Bowden AR, Morales-Juarez DA, Sczaniecka-Clift M, Agudo MM, Lukashchuk N,  
1428 Thomas JC, Jackson SP. 2020. Parallel CRISPR-Cas9 screens clarify impacts of  
1429 p53 on screen performance. *Elife* **9**. <http://dx.doi.org/10.7554/eLife.55325>.

- 1430 Breinig M, Schweitzer AY, Herianto AM, Revia S, Schaefer L, Wendler L, Cobos Galvez  
1431 A, Tschaharganeh DF. 2019. Multiplexed orthogonal genome editing and  
1432 transcriptional activation by Cas12a. *Nat Methods* **16**: 51–54.
- 1433 Campa CC, Weisbach NR, Santinha AJ, Incarnato D, Platt RJ. 2019. Multiplexed  
1434 genome engineering by Cas12a and CRISPR arrays encoded on single transcripts.  
1435 *Nat Methods* **16**: 887–893.
- 1436 Celaj A, Gebbia M, Musa L, Cote AG, Snider J, Wong V, Ko M, Fong T, Bansal P, Mellor  
1437 JC, et al. 2020. Highly Combinatorial Genetic Interaction Analysis Reveals a  
1438 Multi-Drug Transporter Influence Network. *Cell Syst* **10**: 25–38.e10.
- 1439 Cheng J, Clayton JS, Acemel RD, Zheng Y, Taylor RL, Keleş S, Franke M, Boackle SA,  
1440 Harley JB, Quail E, et al. 2022. Regulatory Architecture of the RCA Gene Cluster  
1441 Captures an Intragenic TAD Boundary, CTCF-Mediated Chromatin Looping and a  
1442 Long-Range Intergenic Enhancer. *Front Immunol* **13**: 901747.
- 1443 Chen Z, Arai E, Khan O, Zhang Z, Ngiow SF, He Y, Huang H, Manne S, Cao Z, Baxter  
1444 AE, et al. 2021. In vivo CD8+ T cell CRISPR screening reveals control by Fli1 in  
1445 infection and cancer. *Cell* **184**: 1262–1280.e22.
- 1446 Chow RD, Wang G, Ye L, Codina A, Kim HR, Shen L, Dong MB, Errami Y, Chen S.  
1447 2019. In vivo profiling of metastatic double knockouts through CRISPR-Cpf1  
1448 screens. *Nat Methods* **16**: 405–408.
- 1449 Cleary B, Regev A. 2020. The necessity and power of random, under-sampled  
1450 experiments in biology. *arXiv [q-bioQM]*. <http://arxiv.org/abs/2012.12961>.
- 1451 Clement K, Rees H, Canver MC, Gehrke JM, Farouni R, Hsu JY, Cole MA, Liu DR,  
1452 Joung JK, Bauer DE, et al. 2019. CRISPResso2 provides accurate and rapid  
1453 genome editing sequence analysis. *Nat Biotechnol* **37**: 224–226.
- 1454 Cofsky JC, Karandur D, Huang CJ, Witte IP, Kuriyan J, Doudna JA. 2020.  
1455 CRISPR-Cas12a exploits R-loop asymmetry to form double-strand breaks. *Elife* **9**.  
1456 <http://dx.doi.org/10.7554/eLife.55143>.
- 1457 Costanzo M, Kuzmin E, van Leeuwen J, Mair B, Moffat J, Boone C, Andrews B. 2019.  
1458 Global Genetic Networks and the Genotype-to-Phenotype Relationship. *Cell* **177**:  
1459 85–100.
- 1460 Creutzburg SCA, Wu WY, Mohanraju P, Swartjes T, Alkan F, Gorodkin J, Staals RHJ,  
1461 van der Oost J. 2020. Good guide, bad guide: spacer sequence-dependent  
1462 cleavage efficiency of Cas12a. *Nucleic Acids Res* **48**: 3228–3243.
- 1463 Datlinger P, Rendeiro AF, Schmidl C, Krausgruber T, Traxler P, Klughammer J, Schuster  
1464 LC, Kuchler A, Alpar D, Bock C. 2017. Pooled CRISPR screening with single-cell  
1465 transcriptome readout. *Nat Methods* **14**: 297–301.

- 1466 Dede M, McLaughlin M, Kim E, Hart T. 2020. Multiplex enCas12a screens detect  
1467 functional buffering among paralogs otherwise masked in monogenic Cas9  
1468 knockout screens. *Genome Biol* **21**: 262.
- 1469 DelRosso N, Tycko J, Suzuki P, Andrews C, Aradhana, Mukund A, Liongson I, Ludwig  
1470 C, Spees K, Fordyce P, et al. 2023. Large-scale mapping and mutagenesis of  
1471 human transcriptional effector domains. *Nature* **616**: 365–372.
- 1472 DeWeirdt PC, McGee AV, Zheng F, Nwolah I, Hegde M, Doench JG. 2022. Accounting  
1473 for small variations in the tracrRNA sequence improves sgRNA activity predictions  
1474 for CRISPR screening. *bioRxiv* 2022.06.27.497780.  
1475 <https://www.biorxiv.org/content/10.1101/2022.06.27.497780v1> (Accessed August 6,  
1476 2022).
- 1477 DeWeirdt PC, Sanson KR, Sangree AK, Hegde M, Hanna RE, Feeley MN, Griffith AL,  
1478 Teng T, Borys SM, Strand C, et al. 2021. Optimization of AsCas12a for  
1479 combinatorial genetic screens in human cells. *Nat Biotechnol* **39**: 94–104.
- 1480 Dho SH, Lim JC, Kim LK. 2018. Beyond the Role of CD55 as a Complement  
1481 Component. *Immune Netw* **18**: e11.
- 1482 Dixit A, Parnas O, Li B, Chen J, Fulco CP, Jerby-Arnon L, Marjanovic ND, Dionne D,  
1483 Burks T, Raychowdhury R, et al. 2016. Perturb-Seq: Dissecting Molecular Circuits  
1484 with Scalable Single-Cell RNA Profiling of Pooled Genetic Screens. *Cell* **167**:  
1485 1853–1866.e17.
- 1486 Doench JG. 2018. Am I ready for CRISPR? A user's guide to genetic screens. *Nat Rev*  
1487 *Genet* **19**: 67–80.
- 1488 Domingo J, Baeza-Centurion P, Lehner B. 2019. The Causes and Consequences of  
1489 Genetic Interactions (Epistasis). *Annu Rev Genomics Hum Genet* **20**: 433–460.
- 1490 Domingo J, Diss G, Lehner B. 2018. Pairwise and higher-order genetic interactions  
1491 during the evolution of a tRNA. *Nature* **558**: 117–121.
- 1492 Dorfman R. 1943. The Detection of Defective Members of Large Populations. *aoms* **14**:  
1493 436–440.
- 1494 Du D. 1993. *Combinatorial Group Testing and Its Applications*. World Scientific.
- 1495 Ecco G, Imbeault M, Trono D. 2017. KRAB zinc finger proteins. *Development* **144**:  
1496 2719–2729.
- 1497 Egan ES, Jiang RHY, Moechtar MA, Barteneva NS, Weekes MP, Nobre LV, Gygi SP,  
1498 Paulo JA, Frantzreb C, Tani Y, et al. 2015. Malaria. A forward genetic screen  
1499 identifies erythrocyte CD55 as essential for Plasmodium falciparum invasion.  
1500 *Science* **348**: 711–714.

- 1501 ENCODE Project Consortium, Moore JE, Purcaro MJ, Pratt HE, Epstein CB, Shoresh  
1502 N, Adrian J, Kawli T, Davis CA, Dobin A, et al. 2020. Expanded encyclopaedias of  
1503 DNA elements in the human and mouse genomes. *Nature* **583**: 699–710.
- 1504 Esmaeili Anvar N, Lin C, Wilson LL, Sangree AK, Ma X, Colic M, Doench JG, Hart T.  
1505 2023. Combined genome-scale fitness and paralog synthetic lethality screens with  
1506 just 44k clones: the IN4MER CRISPR/Cas12a multiplex knockout platform. *bioRxiv*  
1507 2023.01.03.522655.
- 1508 Ewen-Campen B, Mohr SE, Hu Y, Perrimon N. 2017. Accessing the Phenotype Gap:  
1509 Enabling Systematic Investigation of Paralog Functional Complexity with CRISPR.  
1510 *Dev Cell* **43**: 6–9.
- 1511 Feldman D, Singh A, Schmid-Burgk JL, Carlson RJ, Mezger A, Garrity AJ, Zhang F,  
1512 Blainey PC. 2019. Optical Pooled Screens in Human Cells. *Cell* **179**: 787–799.e17.
- 1513 Fonfara I, Richter H, Bratovič M, Le Rhun A, Charpentier E. 2016. The  
1514 CRISPR-associated DNA-cleaving enzyme Cpf1 also processes precursor CRISPR  
1515 RNA. *Nature* **532**: 517–521.
- 1516 Frankish A, Diekhans M, Jungreis I, Lagarde J, Loveland JE, Mudge JM, Sisu C, Wright  
1517 JC, Armstrong J, Barnes I, et al. 2021. GENCODE 2021. *Nucleic Acids Res* **49**:  
1518 D916–D923.
- 1519 Fulco CP, Munschauer M, Anyoha R, Munson G, Grossman SR, Perez EM, Kane M,  
1520 Cleary B, Lander ES, Engreitz JM. 2016. Systematic mapping of functional  
1521 enhancer-promoter connections with CRISPR interference. *Science* **354**: 769–773.
- 1522 Fulco CP, Nasser J, Jones TR, Munson G, Bergman DT, Subramanian V, Grossman  
1523 SR, Anyoha R, Doughty BR, Patwardhan TA, et al. 2019. Activity-by-contact model  
1524 of enhancer-promoter regulation from thousands of CRISPR perturbations. *Nat*  
1525 *Genet* **51**: 1664–1669.
- 1526 Gier RA, Budinich KA, Evitt NH, Cao Z, Freilich ES, Chen Q, Qi J, Lan Y, Kohli RM, Shi  
1527 J. 2020. High-performance CRISPR-Cas12a genome editing for combinatorial  
1528 genetic screening. *Nat Commun* **11**: 3455.
- 1529 Gilbert LA, Horlbeck MA, Adamson B, Villalta JE, Chen Y, Whitehead EH, Guimaraes C,  
1530 Panning B, Ploegh HL, Bassik MC, et al. 2014. Genome-Scale CRISPR-Mediated  
1531 Control of Gene Repression and Activation. *Cell* **159**: 647–661.
- 1532 Gilbert LA, Larson MH, Morsut L, Liu Z, Brar GA, Torres SE, Stern-Ginossar N,  
1533 Brandman O, Whitehead EH, Doudna JA, et al. 2013. CRISPR-mediated modular  
1534 RNA-guided regulation of transcription in eukaryotes. *Cell* **154**: 442–451.
- 1535 Gonatopoulos-Pournatzis T, Aregger M, Brown KR, Farhangmehr S, Braunschweig U,  
1536 Ward HN, Ha KCH, Weiss A, Billmann M, Durbin T, et al. 2020. Genetic interaction  
1537 mapping and exon-resolution functional genomics with a hybrid Cas9-Cas12a

- 1538 platform. *Nat Biotechnol* **38**: 638–648.
- 1539 Griffith AL, Zheng F, McGee AV, Miller NW, Szegletes ZM, Reint G, Gademann F,  
1540 Nwolah I, Hegde M, Liu YV, et al. 2023. Optimization of Cas12a for multiplexed  
1541 genome-scale transcriptional activation. *Cell Genomics* **0**.  
1542 [http://www.cell.com.stanford.idm.oclc.org/article/S2666979X23001842/abstract](http://www.cell.com/stanford.idm.oclc.org/article/S2666979X23001842/abstract)  
1543 (Accessed September 7, 2023).
- 1544 Guo LY, Bian J, Davis AE, Liu P, Kempton HR, Zhang X, Chemparathy A, Gu B, Lin X,  
1545 Rane DA, et al. 2022. Multiplexed genome regulation in vivo with hyper-efficient  
1546 Cas12a. *Nat Cell Biol* **24**: 590–600.
- 1547 Haapaniemi E, Botla S, Persson J, Schmierer B, Taipale J. 2018. CRISPR-Cas9  
1548 genome editing induces a p53-mediated DNA damage response. *Nat Med* **24**:  
1549 927–930.
- 1550 Hillmen P, Hall C, Marsh JCW, Elebute M, Bombara MP, Petro BE, Cullen MJ, Richards  
1551 SJ, Rollins SA, Mojciak CF, et al. 2004. Effect of eculizumab on hemolysis and  
1552 transfusion requirements in patients with paroxysmal nocturnal hemoglobinuria. *N*  
1553 *Engl J Med* **350**: 552–559.
- 1554 Hoberecht L, Perampalam P, Lun A, Fortin J-P. 2022. A comprehensive Bioconductor  
1555 ecosystem for the design of CRISPR guide RNAs across nucleases and  
1556 technologies. *Nat Commun* **13**: 6568.
- 1557 Horlbeck MA, Gilbert LA, Villalta JE, Adamson B, Pak RA, Chen Y, Fields AP, Park CY,  
1558 Corn JE, Kampmann M, et al. 2016a. Compact and highly active next-generation  
1559 libraries for CRISPR-mediated gene repression and activation. *Elife* **5**.  
1560 <http://dx.doi.org/10.7554/eLife.19760>.
- 1561 Horlbeck MA, Witkowsky LB, Guglielmi B, Replogle JM, Gilbert LA, Villalta JE, Torigoe  
1562 SE, Tjian R, Weissman JS. 2016b. Nucleosomes impede Cas9 access to DNA in  
1563 vivo and in vitro. *Elife* **5**. <http://dx.doi.org/10.7554/eLife.12677>.
- 1564 Ihry RJ, Worringer KA, Salick MR, Frias E, Ho D, Theriault K, Kommineni S, Chen J,  
1565 Sondey M, Ye C, et al. 2018. p53 inhibits CRISPR-Cas9 engineering in human  
1566 pluripotent stem cells. *Nat Med* **24**: 939–946.
- 1567 Jeon Y, Choi YH, Jang Y, Yu J, Goo J, Lee G, Jeong YK, Lee SH, Kim I-S, Kim J-S, et  
1568 al. 2018. Direct observation of DNA target searching and cleavage by  
1569 CRISPR-Cas12a. *Nat Commun* **9**: 2777.
- 1570 Joberty G, Fälth-Savitski M, Paulmann M, Böschke M, Doce C, Cheng AT, Drewes G,  
1571 Grandi P. 2020. A Tandem Guide RNA-Based Strategy for Efficient CRISPR Gene  
1572 Editing of Cell Populations with Low Heterogeneity of Edited Alleles. *CRISPR J* **3**:  
1573 123–134.
- 1574 Kampmann M, Bassik MC, Weissman JS. 2013. Integrated platform for genome-wide



- 1575 screening and construction of high-density genetic interaction maps in mammalian  
1576 cells. *Proc Natl Acad Sci U S A* **110**: E2317–26.
- 1577 Kent WJ. 2002. BLAT--the BLAST-like alignment tool. *Genome Res* **12**: 656–664.
- 1578 Kim HK, Min S, Song M, Jung S, Choi JW, Kim Y, Lee S, Yoon S, Kim HH. 2018. Deep  
1579 learning improves prediction of CRISPR-Cpf1 guide RNA activity. *Nat Biotechnol*  
1580 **36**: 239–241.
- 1581 Kleinstiver BP, Sousa AA, Walton RT, Tak YE, Hsu JY, Clement K, Welch MM, Horng  
1582 JE, Malagon-Lopez J, Scarfò I, et al. 2019. Engineered CRISPR-Cas12a variants  
1583 with increased activities and improved targeting ranges for gene, epigenetic and  
1584 base editing. *Nat Biotechnol* **37**: 276–282.
- 1585 Knott GJ, Thornton BW, Lobba MJ, Liu J-J, Al-Shayeb B, Watters KE, Doudna JA. 2019.  
1586 Broad-spectrum enzymatic inhibition of CRISPR-Cas12a. *Nat Struct Mol Biol* **26**:  
1587 315–321.
- 1588 Konermann S, Brigham MD, Trevino AE, Joung J, Abudayyeh OO, Barcena C, Hsu PD,  
1589 Habib N, Gootenberg JS, Nishimasu H, et al. 2015. Genome-scale transcriptional  
1590 activation by an engineered CRISPR-Cas9 complex. *Nature* **517**: 583–588.
- 1591 Kuzmin E, VanderSluis B, Wang W, Tan G, Deshpande R, Chen Y, Usaj M, Balint A,  
1592 Mattiazzi Usaj M, van Leeuwen J, et al. 2018. Systematic analysis of complex  
1593 genetic interactions. *Science* **360**. <http://dx.doi.org/10.1126/science.aao1729>.
- 1594 Kvon EZ, Waymack R, Gad M, Wunderlich Z. 2021. Enhancer redundancy in  
1595 development and disease. *Nat Rev Genet* **22**: 324–336.
- 1596 Langmead B, Trapnell C, Pop M, Salzberg SL. 2009. Ultrafast and memory-efficient  
1597 alignment of short DNA sequences to the human genome. *Genome Biol* **10**: R25.
- 1598 Lawrence M, Huber W, Pagès H, Aboyoun P, Carlson M, Gentleman R, Morgan MT,  
1599 Carey VJ. 2013. Software for computing and annotating genomic ranges. *PLoS*  
1600 *Comput Biol* **9**: e1003118.
- 1601 Li K, Liu Y, Cao H, Zhang Y, Gu Z, Liu X, Yu A, Kaphle P, Dickerson KE, Ni M, et al.  
1602 2020. Interrogation of enhancer function by enhancer-targeting CRISPR epigenetic  
1603 editing. *Nat Commun* **11**: 485.
- 1604 Lin X, Liu Y, Liu S, Zhu X, Wu L, Zhu Y, Zhao D, Xu X, Chemparathy A, Wang H, et al.  
1605 2022. Nested epistasis enhancer networks for robust genome regulation. *Science*  
1606 **377**: 1077–1085.
- 1607 Liu J, Srinivasan S, Li C-Y, Ho I-L, Rose J, Shaheen M, Wang G, Yao W, Deem A,  
1608 Bristow C, et al. 2019. Pooled library screening with multiplexed Cpf1 library. *Nat*  
1609 *Commun* **10**: 3144.

- 1610 Liu Y, Han J, Chen Z, Wu H, Dong H, Nie G. 2017. Engineering cell signaling using  
1611 tunable CRISPR-Cpf1-based transcription factors. *Nat Commun* **8**: 2095.
- 1612 Love MI, Huber W, Anders S. 2014. Moderated estimation of fold change and dispersion  
1613 for RNA-seq data with DESeq2. *Genome Biol* **15**: 550.
- 1614 Meyers RM, Bryan JG, McFarland JM, Weir BA, Sizemore AE, Xu H, Dharia NV,  
1615 Montgomery PG, Cowley GS, Pantel S, et al. 2017. Computational correction of  
1616 copy number effect improves specificity of CRISPR-Cas9 essentiality screens in  
1617 cancer cells. *Nat Genet* **49**: 1779–1784.
- 1618 Mukund AX, Tycko J, Allen SJ, Robinson SA, Andrews C, Sinha J, Ludwig CH, Spees  
1619 K, Bassik MC, Bintu L. 2023. High-throughput functional characterization of  
1620 combinations of transcriptional activators and repressors. *Cell Syst* **0**.  
1621 <http://dx.doi.org/10.1016/j.cels.2023.07.001> (Accessed August 5, 2023).
- 1622 Nakamura M, Ivec AE, Gao Y, Qi LS. 2021. Durable CRISPR-Based Epigenetic  
1623 Silencing. *BioDesign Research* **2021**.  
1624 <https://spj.sciencemag.org/journals/bdr/2021/9815820/> (Accessed August 28,  
1625 2023).
- 1626 Naqvi MM, Lee L, Montaguth OET, Diffin FM, Szczelkun MD. 2022.  
1627 CRISPR-Cas12a-mediated DNA clamping triggers target-strand cleavage. *Nat*  
1628 *Chem Biol* **18**: 1014–1022.
- 1629 Norman TM, Horlbeck MA, Replogle JM, Ge AY, Xu A, Jost M, Gilbert LA, Weissman  
1630 JS. 2019. Exploring genetic interaction manifolds constructed from rich single-cell  
1631 phenotypes. *Science* **365**: 786–793.
- 1632 Nuñez JK, Chen J, Pommier GC, Cogan JZ, Replogle JM, Adriaens C, Ramadoss GN,  
1633 Shi Q, Hung KL, Samelson AJ, et al. 2021. Genome-wide programmable  
1634 transcriptional memory by CRISPR-based epigenome editing. *Cell* **184**:  
1635 2503–2519.e17.
- 1636 O’Geen H, Ren C, Nicolet CM, Perez AA, Halmai J, Le VM, Mackay JP, Farnham PJ,  
1637 Segal DJ. 2017. dCas9-based epigenome editing suggests acquisition of histone  
1638 methylation is not sufficient for target gene repression. *Nucleic Acids Res* **45**:  
1639 9901–9916.
- 1640 O’Geen H, Tomkova M, Combs JA, Tilley EK, Segal DJ. 2022. Determinants of heritable  
1641 gene silencing for KRAB-dCas9 + DNMT3 and Ezh2-dCas9 + DNMT3 hit-and-run  
1642 epigenome editing. *Nucleic Acids Res* **50**: 3239–3253.
- 1643 Osterwalder M, Barozzi I, Tissières V, Fukuda-Yuzawa Y, Mannion BJ, Afzal SY, Lee  
1644 EA, Zhu Y, Plajzer-Frick I, Pickle CS, et al. 2018. Enhancer redundancy provides  
1645 phenotypic robustness in mammalian development. *Nature* **554**: 239–243.
- 1646 Parrish PCR, Thomas JD, Gabel AM, Kamlapurkar S, Bradley RK, Berger AH. 2021.

- 1647 Discovery of synthetic lethal and tumor suppressor paralog pairs in the human  
1648 genome. *Cell Rep* **36**: 109597.
- 1649 Przybyla L, Gilbert LA. 2022. A new era in functional genomics screens. *Nat Rev Genet*  
1650 **23**: 89–103.
- 1651 Qi LS, Larson MH, Gilbert LA, Doudna JA, Weissman JS, Arkin AP, Lim WA. 2013.  
1652 Repurposing CRISPR as an RNA-guided platform for sequence-specific control of  
1653 gene expression. *Cell* **152**: 1173–1183.
- 1654 Reilly SK, Gosai SJ, Gutierrez A, Mackay-Smith A, Ulirsch JC, Kanai M, Mouri K,  
1655 Berenzy D, Kales S, Butler GM, et al. 2021. Direct characterization of cis-regulatory  
1656 elements and functional dissection of complex genetic associations using  
1657 HCR–FlowFISH. *Nat Genet* **53**: 1166–1176.
- 1658 Ren X, Wang M, Li B, Jamieson K, Zheng L, Jones IR, Li B, Takagi MA, Lee J,  
1659 Maliskova L, et al. 2021. Parallel characterization of cis-regulatory elements for  
1660 multiple genes using CRISPRpath. *Sci Adv* **7**: eabi4360.
- 1661 Replogle JM, Bonnar JL, Pogson AN, Liem CR, Maier NK, Ding Y, Russell BJ, Wang X,  
1662 Leng K, Guna A, et al. 2022a. Maximizing CRISPRi efficacy and accessibility with  
1663 dual-sgRNA libraries and optimal effectors. *bioRxiv* 2022.07.13.499814.  
1664 <https://www.biorxiv.org/content/10.1101/2022.07.13.499814v2> (Accessed  
1665 December 7, 2022).
- 1666 Replogle JM, Bonnar JL, Pogson AN, Liem CR, Maier NK, Ding Y, Russell BJ, Wang X,  
1667 Leng K, Guna A, et al. 2022b. Maximizing CRISPRi efficacy and accessibility with  
1668 dual-sgRNA libraries and optimal effectors. *Elife* **11**.  
1669 <http://dx.doi.org/10.7554/eLife.81856>.
- 1670 Replogle JM, Norman TM, Xu A, Hussmann JA, Chen J, Cogan JZ, Meer EJ, Terry JM,  
1671 Riordan DP, Srinivas N, et al. 2020. Combinatorial single-cell CRISPR screens by  
1672 direct guide RNA capture and targeted sequencing. *Nat Biotechnol* **38**: 954–961.
- 1673 Sack LM, Davoli T, Xu Q, Li MZ, Elledge SJ. 2016. Sources of Error in Mammalian  
1674 Genetic Screens. *G3* **6**: 2781–2790.
- 1675 Schellenberger V, Wang C-W, Geething NC, Spink BJ, Campbell A, To W, Scholle MD,  
1676 Yin Y, Yao Y, Bogin O, et al. 2009. A recombinant polypeptide extends the in vivo  
1677 half-life of peptides and proteins in a tunable manner. *Nat Biotechnol* **27**:  
1678 1186–1190.
- 1679 Schraivogel D, Gschwind AR, Milbank JH, Leonce DR, Jakob P, Mathur L, Korbel JO,  
1680 Merten CA, Velten L, Steinmetz LM. 2020. Targeted Perturb-seq enables  
1681 genome-scale genetic screens in single cells. *Nat Methods* **17**: 629–635.
- 1682 Shakya B, Patel SD, Tani Y, Egan ES. 2021. Erythrocyte CD55 mediates the  
1683 internalization of *Plasmodium falciparum* parasites. *Elife* **10**.

- 1684 <http://dx.doi.org/10.7554/eLife.61516>.
- 1685 Singh D, Mallon J, Poddar A, Wang Y, Tippana R, Yang O, Bailey S, Ha T. 2018.  
1686 Real-time observation of DNA target interrogation and product release by the  
1687 RNA-guided endonuclease CRISPR Cpf1 (Cas12a). *Proc Natl Acad Sci U S A* **115**:  
1688 5444–5449.
- 1689 Srinivas N, Ouldrige TE, Sulc P, Schaeffer JM, Yurke B, Louis AA, Doye JPK, Winfree  
1690 E. 2013. On the biophysics and kinetics of toehold-mediated DNA strand  
1691 displacement. *Nucleic Acids Res* **41**: 10641–10658.
- 1692 Stegmeier F, Hu G, Rickles RJ, Hannon GJ, Elledge SJ. 2005. A lentiviral  
1693 microRNA-based system for single-copy polymerase II-regulated RNA interference  
1694 in mammalian cells. *Proc Natl Acad Sci U S A* **102**: 13212–13217.
- 1695 Swarts DC, Jinek M. 2019. Mechanistic Insights into the cis- and trans-Acting DNase  
1696 Activities of Cas12a. *Mol Cell* **73**: 589–600.e4.
- 1697 Takahashi K, Yamanaka S. 2006. Induction of pluripotent stem cells from mouse  
1698 embryonic and adult fibroblast cultures by defined factors. *Cell* **126**: 663–676.
- 1699 Taylor MB, Ehrenreich IM. 2014. Genetic interactions involving five or more genes  
1700 contribute to a complex trait in yeast. *PLoS Genet* **10**: e1004324.
- 1701 Taylor MB, Ehrenreich IM. 2015. Transcriptional Derepression Uncovers Cryptic  
1702 Higher-Order Genetic Interactions. *PLoS Genet* **11**: e1005606.
- 1703 Tycko J, Wainberg M, Marinov GK, Ursu O, Hess GT, Ego BK, Aradhana, Li A, Truong  
1704 A, Trevino AE, et al. 2019. Mitigation of off-target toxicity in CRISPR-Cas9 screens  
1705 for essential non-coding elements. *Nat Commun* **10**: 4063.
- 1706 Van MV, Fujimori T, Bintu L. 2021. Nanobody-mediated control of gene expression and  
1707 epigenetic memory. *Nat Commun* **12**: 537.
- 1708 Wessels H-H, Méndez-Mancilla A, Hao Y, Papalexi E, Mauck WM 3rd, Lu L, Morris JA,  
1709 Mimitou EP, Smibert P, Sanjana NE, et al. 2023. Efficient combinatorial targeting of  
1710 RNA transcripts in single cells with Cas13 RNA Perturb-seq. *Nat Methods* **20**:  
1711 86–94.
- 1712 Wickham H, Averick M, Bryan J, Chang W, McGowan L, François R, Grolmund G,  
1713 Hayes A, Henry L, Hester J, et al. 2019. Welcome to the tidyverse. *J Open Source*  
1714 *Softw* **4**: 1686.
- 1715 Wong ASL, Choi GCG, Cheng AA, Purcell O, Lu TK. 2015. Massively parallel high-order  
1716 combinatorial genetics in human cells. *Nat Biotechnol* **33**: 952–961.
- 1717 Wong ASL, Choi GCG, Lu TK. 2016. Deciphering Combinatorial Genetics. *Annu Rev*  
1718 *Genet* **50**: 515–538.

- 1719 Xie S, Duan J, Li B, Zhou P, Hon GC. 2017. Multiplexed Engineering and Analysis of  
1720 Combinatorial Enhancer Activity in Single Cells. *Mol Cell* **66**: 285–299.e5.
- 1721 Yamano T, Nishimasu H, Zetsche B, Hirano H, Slaymaker IM, Li Y, Fedorova I, Nakane  
1722 T, Makarova KS, Koonin EV, et al. 2016. Crystal Structure of Cpf1 in Complex with  
1723 Guide RNA and Target DNA. *Cell* **165**: 949–962.
- 1724 Yao D, Binan L, Bezney J, Simonton B, Freedman J, Frangieh CJ, Dey K,  
1725 Geiger-Schuller K, Eraslan B, Gusev A, et al. 2023. Compressed Perturb-seq:  
1726 highly efficient screens for regulatory circuits using random composite  
1727 perturbations. *bioRxiv* 2023.01.23.525200.
- 1728 Yin J-A, Frick L, Scheidmann MC, Trevisan C, Dhingra A, Spinelli A, Wu Y, Yao L, Vena  
1729 DL, De Cecco E, et al. 2022. Robust and Versatile Arrayed Libraries for Human  
1730 Genome-Wide CRISPR Activation, Deletion and Silencing. *bioRxiv*  
1731 2022.05.25.493370. <https://www.biorxiv.org/content/10.1101/2022.05.25.493370v1>  
1732 (Accessed July 10, 2022).
- 1733 Zetsche B, Gootenberg JS, Abudayyeh OO, Slaymaker IM, Makarova KS,  
1734 Essletzbichler P, Volz SE, Joung J, van der Oost J, Regev A, et al. 2015. Cpf1 is a  
1735 single RNA-guided endonuclease of a class 2 CRISPR-Cas system. *Cell* **163**:  
1736 759–771.
- 1737 Zetsche B, Heidenreich M, Mohanraju P, Fedorova I, Kneppers J, DeGennaro EM,  
1738 Winblad N, Choudhury SR, Abudayyeh OO, Gootenberg JS, et al. 2017. Multiplex  
1739 gene editing by CRISPR-Cpf1 using a single crRNA array. *Nat Biotechnol* **35**:  
1740 31–34.
- 1741 Zhang L, Sun R, Yang M, Peng S, Cheng Y, Chen C. 2019. Conformational Dynamics  
1742 and Cleavage Sites of Cas12a Are Modulated by Complementarity between crRNA  
1743 and DNA. *iScience* **19**: 492–503.
- 1744 Zhang L, Zuris JA, Viswanathan R, Edelstein JN, Turk R, Thommandru B, Rube HT,  
1745 Glenn SE, Collingwood MA, Bode NM, et al. 2021. AsCas12a ultra nuclease  
1746 facilitates the rapid generation of therapeutic cell medicines. *Nat Commun* **12**:  
1747 3908.
- 1748 Zhou B, Ho SS, Greer SU, Zhu X, Bell JM, Arthur JG, Spies N, Zhang X, Byeon S,  
1749 Pattni R, et al. 2019. Comprehensive, integrated, and phased whole-genome  
1750 analysis of the primary ENCODE cell line K562. *Genome Res* **29**: 472–484.
- 1751 Zhou P, Chan BKC, Wan YK, Yuen CTL, Choi GCG, Li X, Tong CSW, Zhong SSW, Sun  
1752 J, Bao Y, et al. 2020. A Three-Way Combinatorial CRISPR Screen for Analyzing  
1753 Interactions among Druggable Targets. *Cell Rep* **32**: 108020.
- 1754

## Table of Contents for Main and Supplemental Figures

|     |                                                                                                                                                                                     |    |
|-----|-------------------------------------------------------------------------------------------------------------------------------------------------------------------------------------|----|
| 1   | dAsCas12a-KRAB variants are dose-limited and weak in CRISPRi activity when delivered lentivirally, despite incorporating state-of-the-art optimizations. . . . .                    | 47 |
| 2   | multiAsCas12a-KRAB (R1226A/E174R/S542R/K548R), an engineered variant that favors a nicked DNA intermediate, substantially improves lentivirally delivered CRISPRi activity. . . . . | 48 |
| 3   | multiAsCas12a-KRAB enables multi-gene CRISPRi perturbations using higher-order arrayed crRNA lentiviral constructs . . . . .                                                        | 49 |
| 4   | multiAsCas12a-KRAB enables TSS-targeting pooled CRISPRi screens, including with 6-plex crRNA arrays. . . .                                                                          | 50 |
| 5   | multiAsCas12a-KRAB CRISPRi enables enhancer perturbation and discovery. . . . .                                                                                                     | 51 |
| 6   | multiAsCas12a-KRAB enables combinatorial targeting of cis-regulatory elements in pooled CRISPRi screens . . .                                                                       | 52 |
| 7   | Group testing framework for efficient exploration of combinatorial CRISPR perturbations. . . . .                                                                                    | 53 |
| S1  | Example of flow cytometry gating strategy for CRISPRi experiments. . . . .                                                                                                          | 55 |
| S2  | Additional replicate testing dAsCas12a-3xKRAB CRISPRi activity. . . . .                                                                                                             | 56 |
| S3  | Western blot of fusion proteins. . . . .                                                                                                                                            | 57 |
| S4  | CRISPRi activity of multiCas12a-KRAB, denAsCas12a-KRAB, and dAsCas12a-KRABx3 in C42B cells. . . . .                                                                                 | 58 |
| S5  | dAsCas12a-KRABx3 CRISPRi by transient transfection in HEK 293T cells. . . . .                                                                                                       | 59 |
| S6  | Comparisons of dAsCas12a variant fusion CRISPRi constructs using up to 3-plex crRNA constructs. . . . .                                                                             | 60 |
| S7  | Additional replicates testing effect of dose on denAsCas12a-KRAB CRISPRi activity . . . . .                                                                                         | 61 |
| S8  | Testing CRISPRi activity of lentivirally delivered truncated crRNAs . . . . .                                                                                                       | 62 |
| S9  | CD81 knockdown by denAsCas12a-KRAB vs. multiAsCas12a-KRAB at different protein and crRNA MOIs . . . .                                                                               | 63 |
| S10 | CD55 knockdown by denAsCas12a-KRAB vs. multiAsCas12a-KRAB at different protein MOIs . . . . .                                                                                       | 64 |
| S11 | RNA-seq analysis of crRNA specificity. . . . .                                                                                                                                      | 65 |
| S12 | CRISPRi knockdown of CD55 and B2M using up to 6-plex crRNA arrays. . . . .                                                                                                          | 66 |
| S13 | Monitoring P2A-BFP reporter as proxy of fusion protein expression level. . . . .                                                                                                    | 67 |
| S14 | Indel quantification and gene expression knockdown simulation for dual-targeting of the KIT TSS region. . . . .                                                                     | 68 |
| S15 | Indel quantification and gene expression knockdown simulation for single-targeting of the KIT TSS region. . . . .                                                                   | 69 |
| S16 | Double and triple gene knockdown by CRISPRi using higher-order crRNA arrays. . . . .                                                                                                | 70 |
| S17 | Summaries of Library 1 and Library 2 screens. . . . .                                                                                                                               | 71 |
| S18 | Screen replicate concordance for Library 1 and Library 2. . . . .                                                                                                                   | 72 |
| S19 | Cell fitness score distributions of intergenic vs. non-targeting negative control crRNAs. . . . .                                                                                   | 73 |
| S20 | Difference in cell fitness scores for 6-plex vs. 1-plex crRNA constructs. . . . .                                                                                                   | 74 |

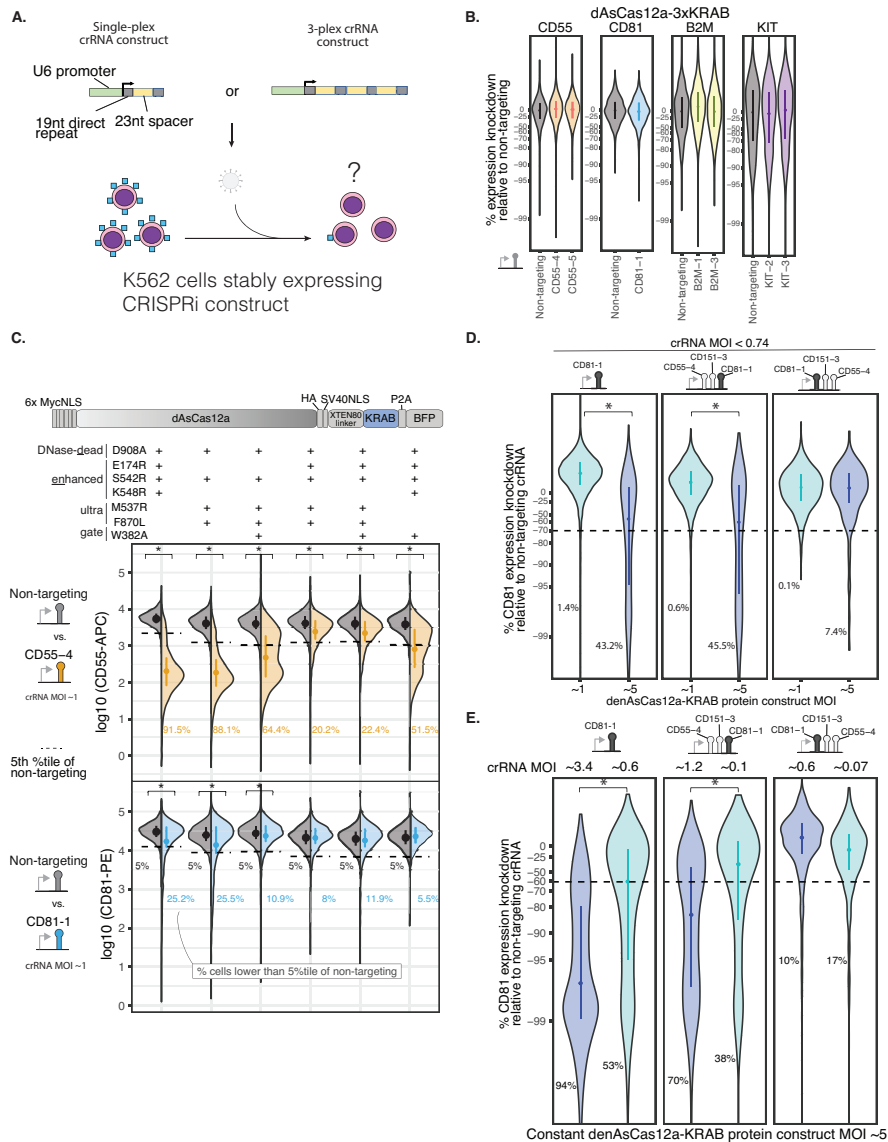

**Figure 1 – dAsCas12a-KRAB variants are dose-limited and weak in CRISPRi activity when delivered lentivirally, despite incorporating state-of-the-art optimizations.**

**A)** Schematic for assaying CRISPRi activity of Cas12a constructs using lentivirally transduced single-plex or 3-plex crRNAs targeting cell surface marker genes assayed by antibody staining and flow cytometry.

**B)** K562 cells constitutively expressing dAsCas12a-KRABx3 (Campa et al., 2019) were lentivirally transduced with single crRNAs targeting CD55, CD81, B2M, KIT, or a non-targeting crRNA, and assayed by flow cytometry 6 days after crRNA transduction.

**C)** A panel of Cas12a variants harboring combinations of mutations are tested using crCD55-4 and crCD81-1 using the fusion protein domain architecture shown. Both Cas12a fusion protein and crRNA constructs are delivered by lentiviral transduction. D908A is a mutation in the RuvC catalytic triad that renders Cas12a DNase-inactive (Yamano et al., 2016; Zetsche et al., 2015). Other mutations are described in detail in the main text. Shown are single-cell distributions of target gene expression assayed by flow cytometry 6 days after crRNA transduction for one of 3 independent replicates. One-sided Wilcoxon rank-sum test was performed comparing the single-cell distributions of the non-targeting control vs. the corresponding targeting crRNA; asterisk indicates  $p < 0.01$ . Additional replicates and results for additional crRNA constructs (up to 3-plex crRNA constructs) are summarized in Fig. S6.

**D)** Analysis of CD81 knockdown in cells lentivirally transduced with denAsCas12a-KRAB protein construct at MOI  $\sim 1$  vs. MOI  $\sim 5$ , while maintaining constant crRNA MOI ( $< 0.74$ ) for each crRNA construct. CD81 expression was assayed by flow cytometry 6 days after crRNA transduction. Shown are single-cell distributions of target gene expression knockdown as a percentage of non-targeting control for one of 3-6 biological replicates for each crRNA construct. Median and interquartile range are shown for each distribution. Percentage of cells below the 5th percentile (dashed line) of non-targeting crRNA are shown. One-sided Wilcoxon rank-sum test was performed on single-cell distributions for this replicate; asterisk indicates  $p < 0.01$ . Summaries of all replicates shown in Fig. S7A.

**E)** Similar to D, but maintaining constant denAsCas12a-KRAB protein construct MOI at  $\sim 5$ , while crRNA MOI is varied as indicated. CD81 expression was assayed by flow cytometry 10 days after crRNA transduction. Shown are single-cell distributions of CD81 knockdown for one of two biological replicates. One-sided Wilcoxon rank-sum test was performed on single-cell distributions for each replicate; asterisk indicates  $p < 0.01$ . Additional replicate shown in Fig. S7B.

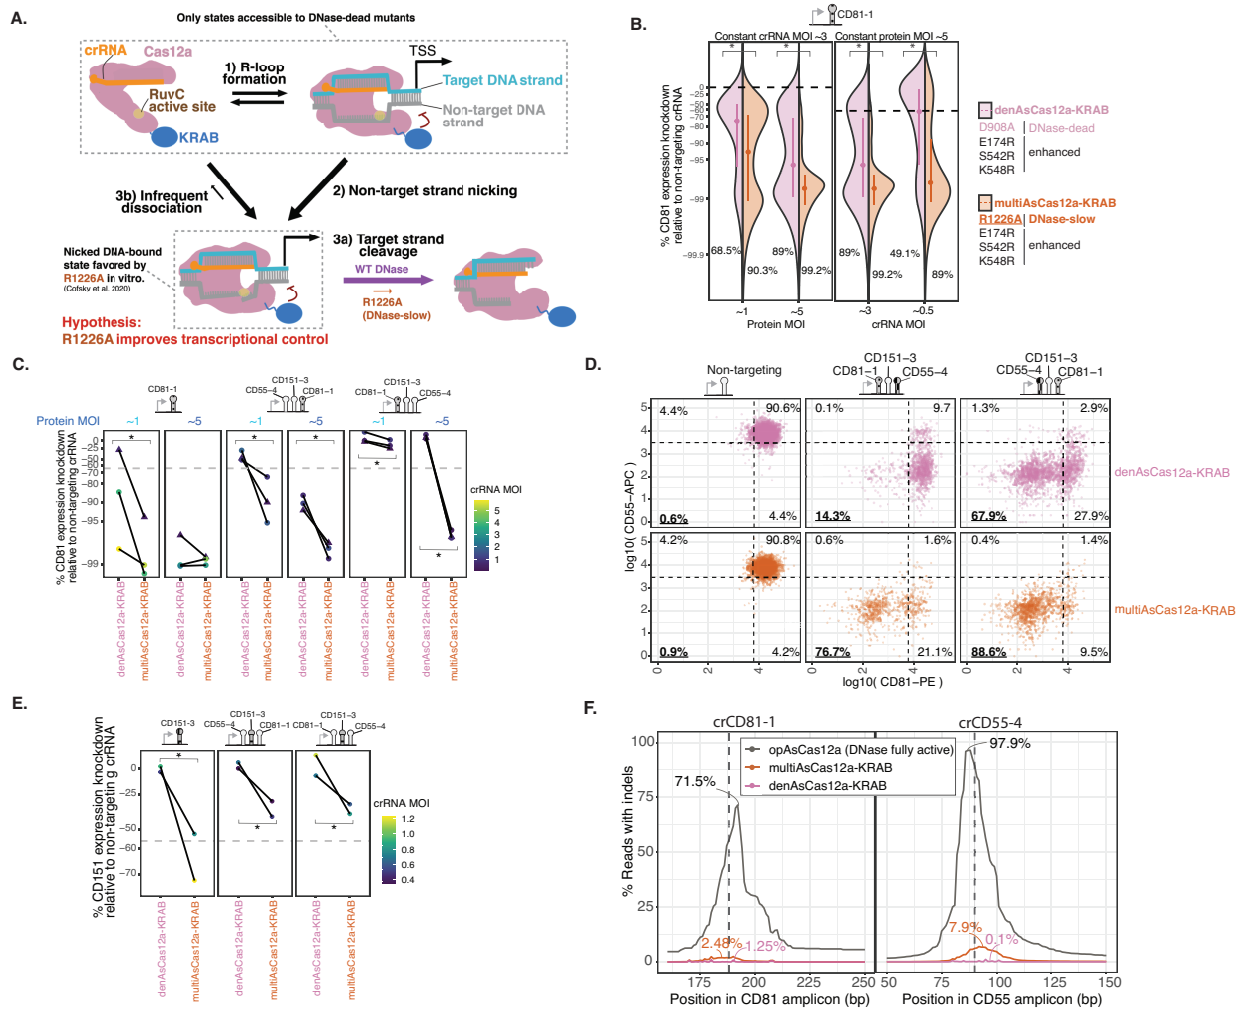

**Figure 2 – multiAsCas12a-KRAB (R1226A/E174R/S542R/K548R), an engineered variant that favors a nicked DNA intermediate, substantially improves lentivirally delivered CRISPRi activity.**

**A)** Model of Cas12a DNA binding and cleavage states for wildtype DNase vs. R1226A mutant based on prior in vitro studies as detailed in main text. Sizes of arrows qualitatively reflect reaction rates.

**B)** Comparison of denCas12a-KRAB (D908A/E174R/S542R/K548R) vs. multiAsCas12a-KRAB (R1226A/E174R/S542R/K548R) in CRISPRi knockdown of CD81 using crCD81-1. CD81 expression assayed by flow cytometry 10 days after crRNA transduction. Left panel: Holding crRNA MOI constant at ~3 while testing protein MOI ~1 vs. ~5. Right panel: Holding protein MOI constant at ~5 while testing crRNA MOI at ~3 vs. ~0.5. Asterisks indicate  $p < 0.01$  for one-sided Wilcoxon rank-sum test of single-cell distributions. Percentage of cells below the 5th percentile of non-targeting crRNA control (dashed line) is shown for each condition. One biological replicate is shown for each condition; additional replicates shown in Fig. S9.

**C)** Comparison of CD81 knockdown by lentivirally delivered denAsCas12a-KRAB vs. multiAsCas12a-KRAB at protein MOI ~1 vs. ~5 across a panel of single and 3-plex crRNA constructs, while holding constant crRNA MOI for each paired fusion protein comparison for each crRNA construct. Dashed gray line indicates 5th percentile of non-targeting crRNA control. crRNA MOI indicated by color scale. Lines connect paired replicates. One-sided Wilcoxon rank-sum tests were performed on single-cell distributions for each replicate, and asterisk denotes  $p < 0.01$  for all paired replicates within each condition. Dots indicate flow cytometry measurement 10 days after crRNA transduction; triangles indicate flow cytometry measurement 16 days after crRNA transduction.

**D)** Same as C but showing scatter plot of CD55-APC and CD81-PE antibody co-staining signals on flow cytometry performed 16 days after transduction of the indicated crRNA constructs in K562 cells lentivirally transduced with denAsCas12a-KRAB vs. multiAsCas12a-KRAB at protein MOI ~5. Quadrants drawn based on the 5th percentile of non-targeting controls and the percentage of cells in each quadrant denoted.

**E)** K562 cells piggyBac-engineered to constitutively express denAsCas12a-KRAB or multiAsCas12a-KRAB were transduced with the indicated crRNA constructs, followed by measurement of CD151 expression by antibody staining and flow cytometry 13 days after crRNA transduction. Median CD151 expression knockdown relative to non-targeting control is shown for each individual replicate. Dashed gray line indicates 5th percentile of non-targeting crRNA control. crRNA MOI indicated by color scale. One-sided Wilcoxon rank-sum test was performed for single-cell expression distributions comparing denAsCas12a-KRAB vs. multiAsCas12a-KRAB for each replicate; asterisk indicates  $p < 0.001$  for all replicate-level comparisons.

**F)** Indel quantification from PCR amplicons surrounding target sites of crCD81-1 and crCD55-4 in cells lentivirally transduced at protein MOI ~5 for denAsCas12a-KRAB and multiAsCas12a-KRAB. Cells lentivirally transduced with opAsCas12a (DNase fully active) are shown for comparison. Percent of reads containing indels at each base position within the amplicon is plotted, with labels indicating maximum indel frequency observed across all bases within the amplicon.



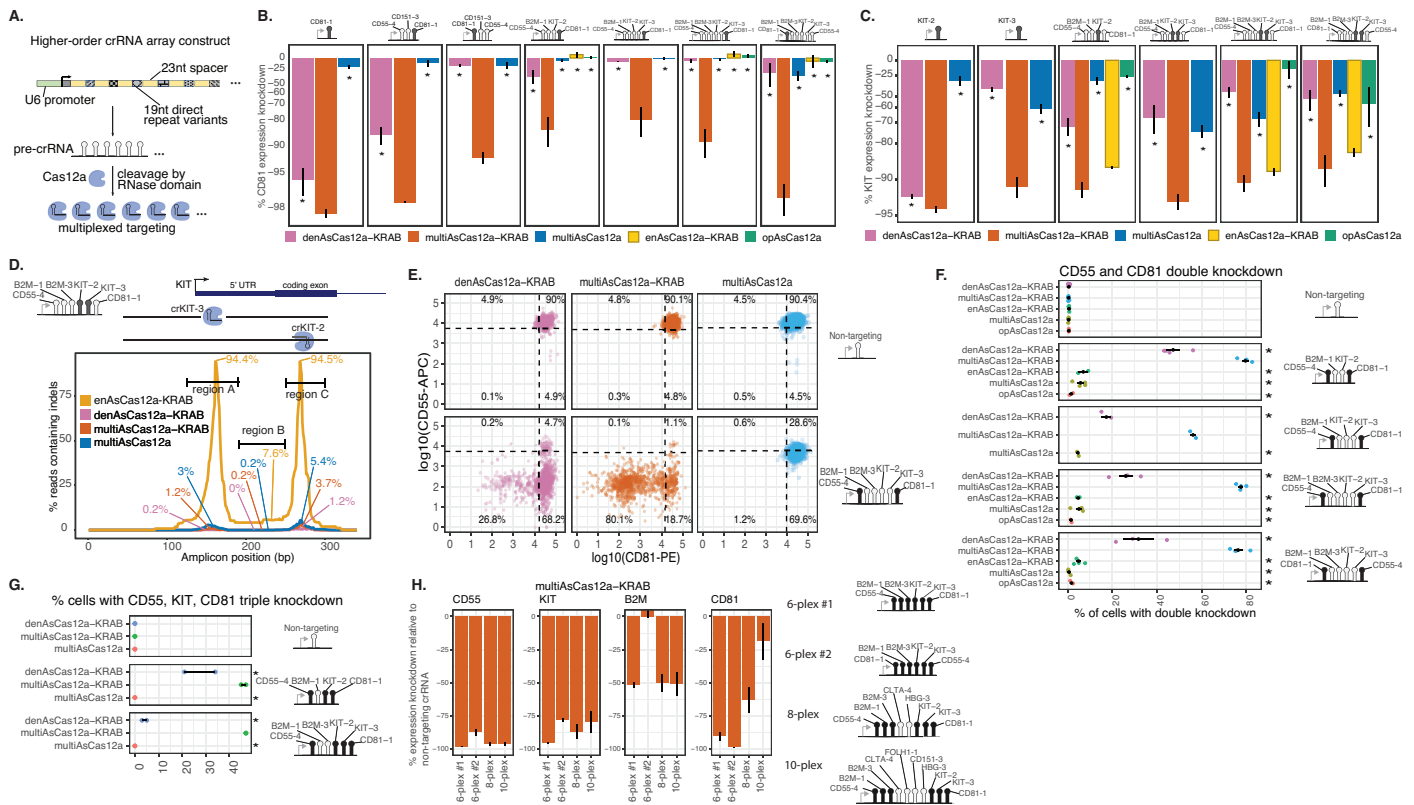

**Figure 3 – multiAsCas12a-KRAB enables multi-gene CRISPRi perturbations using higher-order arrayed crRNA lentiviral constructs**

**A)** Schematic for higher-order crRNA expression constructs. 23nt spacers are interspersed by 19nt direct repeat variants (DeWeirdt et al., 2020) uniquely assigned to each position within the array. **B)** Flow cytometry analysis of CD81 expression knockdown by antibody staining 6 days after transduction of the indicated lentiviral crRNA constructs in K562 cells engineered to constitutively express the specified fusion protein construct. Shown are averages of median single-cell expression knockdown from 2-5 biological replicates for each crRNA construct, with error bars indicating SEM. One-sided Wilcoxon rank-sum test was performed for differences in single-cell expression distributions for each fusion protein against multiAsCas12a-KRAB for each individual replicate. Asterisk indicates  $p < 0.01$  for all replicates for a given pairwise comparison. **C)** Same as B, but shown for KIT expression knockdown. **D)** Indel quantification for the indicated fusion protein constructs using a 6-plex crRNA construct encoding crKIT-2 and crKIT-3 that target opposite strands at sites spaced 95bp apart near the KIT TSS. Following crRNA transduction, cells were sorted on day 3 for GFP marker on the crRNA construct, and the 340bp genomic region surrounding both crRNA binding sites was PCR amplified from cell lysates harvested 15 days after crRNA transduction. The maximum percentages of reads containing indels overlapping any base position within each of the demarcated regions (region A, region B, region C) are shown. **E)** Comparison of the indicated fusion protein constructs in dual CD55 and CD81 CRISPRi knockdown 10 days after lentiviral transduction of a 6-plex crRNA construct by flow cytometry. Shown are log10 fluorescence intensity for each antibody stain and the percentages of cells in each quadrant, defined by the 5th percentile of non-targeting crRNA for each fluorescence signal, are indicated. **F)** Summary of the same experiment in E for a larger panel of crRNA constructs, showing the percentage of cells with successful double-knockdown of CD55 and CD81 (e.g. same gating strategy as bottom left quadrant in E). 2-6 biological replicates are shown as individual data points and summarized by the mean and SEM as error bars. Two-sample chi-square test was used compare the proportion of cells with double-knockdown between multiAsCas12a-KRAB and each of the other fusion protein constructs; asterisk indicates  $p < 0.01$  for all replicates. **G)** Analogous to F, except triple knockdown of CD55, KIT, and CD81 was quantified by the percentage of cells that are below the 5th percentile along all 3 dimensions on day 33 after transduction of crRNA constructs. 2 biological replicates are shown as individual data points. Two-sample chi-square test was used compare the proportion of cells with double-knockdown between multiAsCas12a-KRAB and each of the other fusion protein constructs; asterisk indicates  $p < 0.01$  for all replicates. **H)** Gene expression knockdown by multiAsCas12a-KRAB using 6-plex, 8-plex and 10-plex crRNA array constructs was measured by flow cytometry 10-11 days after lentiviral transduction of crRNA constructs. Shown are median gene expression knockdown averaged from 2-4 biological replicates, with error bars denoting SEM. CRISPRi activities of crFOLH1-1, crCD151-3 and crHBG-3 were not assayed in this experiment, but these spacers are active when encoded as individual crRNAs as shown in Fig. S4B, Fig. 2E, and Fig. 5A, respectively. All protein constructs shown in A-H were delivered by piggyBac transposition into K562 cells and sorted for the same expression level of the P2A-BFP marker (except opAsCas12a was delivered by lentiviral transduction and selected for by puromycin-resistance marker).

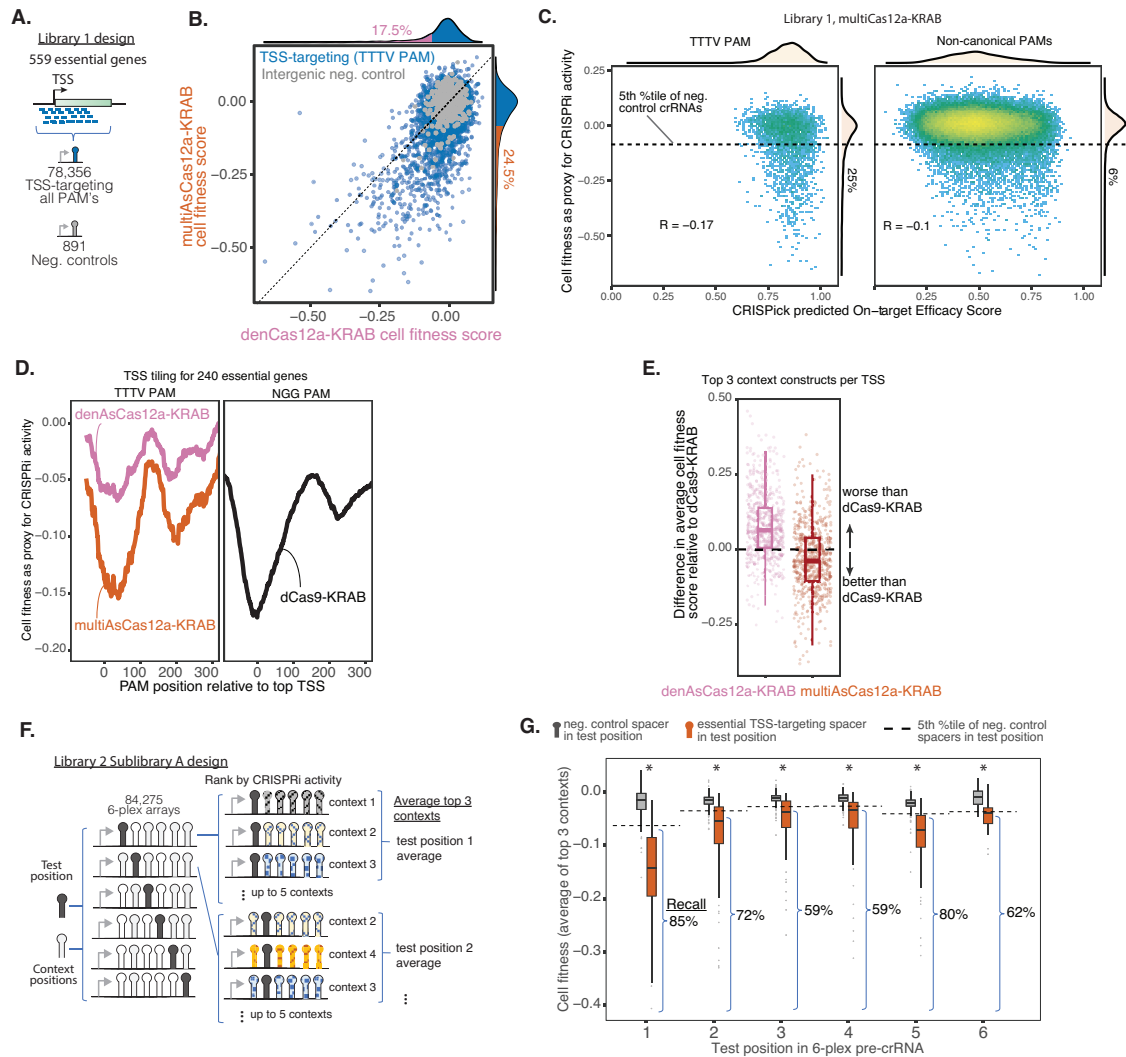

**Figure 4 – multiAsCas12a-KRAB enables TSS-targeting pooled CRISPRi screens, including with 6-plex crRNA arrays.**

**A)** Design of Library 1 consisting of single crRNAs tiling TSS-proximal regions of essential genes.

**B)** Library 1: Scatter plot of cell fitness scores in K562 cells for multiAsCas12a-KRAB vs. denCas12a-KRAB for 3,334 single crRNA constructs with sufficient read coverage for analysis and targeting canonical TTTV PAMs within -50bp to +300bp window of 584 essential gene TSS's. Marginal histograms show percentage of crRNA constructs with cell fitness scores exceeding the 5th percentile of negative control crRNAs.  $y = x$  line is shown.

**C)** 2D density plots of cell fitness scores vs. predicted crRNA on-targeting efficacy score from the CRISPick algorithm, grouped by TTTV PAM vs. non-canonical PAM's. The 5th percentiles of intergenic negative control crRNAs cell fitness scores are shown as a dashed horizontal line and the percentage of crRNAs below that threshold shown in the marginal histogram. Pearson correlation coefficients are shown.

**D)** Library 1: Moving average cell fitness score across all TTTV PAM-targeting crRNAs at each PAM position relative to the TSS (left), shown for the 240 essential gene TSS's for which analogous dCas9-KRAB NGG PAM tiling screen data (Nuñez et al., 2021) is available in K562 cells (right).

**E)** Library 1: Boxplots of average cell fitness scores of top 3 crRNAs for each essential TSS for multiAsCas12a-KRAB or denCas12a-KRAB, subtracted by the average cell fitness scores from top 3 sgRNAs for the same TSS for dCas9-KRAB (Nuñez et al., 2021). Boxplots show median, interquartile range, whiskers indicating 1.5x interquartile range, and are overlaid with individual data points.

**F)** Design of Library 2 Sublibrary A, aimed at evaluating CRISPRi activity each position in the 6-plex array. For each 6-plex array, a specific position is defined as the test position (which can encode either a TSS-targeting spacer or a negative control spacer), and the remaining positions are referred to as context positions encoding one of 5 sets of negative control spacers designated only for context positions.

**G)** Library 2 Sublibrary A: Analysis of 2,987 6-plex constructs with sufficient read coverage and encodes in the test position one of 123 spacers that scored as strong hits as single crRNAs in the Library 1 screen, compared to constructs that encode an intergenic negative control spacer in the test position. Boxplots show cell fitness scores averaged from the top 3 context constructs of each test position spacer in the 6-plex array, grouped by negative control spacers vs. essential TSS-targeting spacers in each test position. Recall is calculated as the percentage of essential TSS-targeting spacers (that were empirically active in the single crRNA Library 1 screen) recovered by the Library 2 6-plex crRNA array screen for a given test position, using the 5th percentile of constructs containing negative control spacer in the same test position as a threshold for calling hits. Boxplots display median, interquartile range, whiskers indicating 1.5x interquartile range, and outliers. One-sided Wilcoxon rank-sum test was performed for the difference in the distributions of negative control spacers vs. TSS-targeting spacers at each position, with asterisks indicating  $p < 0.0001$ .

A.

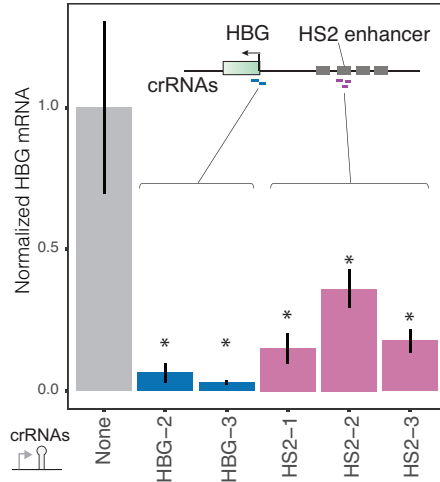

B.

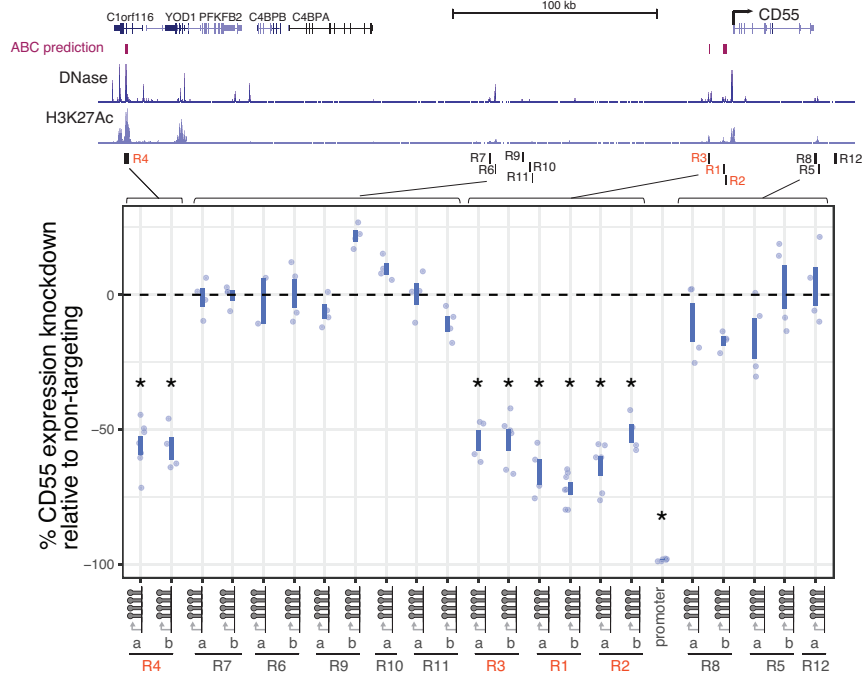

C.

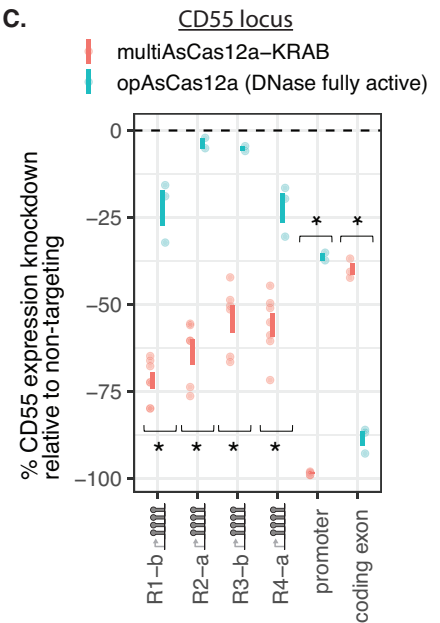

**Figure 5 – multiAsCas12a-KRAB CRISPRi enables enhancer perturbation and discovery.**

A) K562 cells constitutively expressing multiAsCas12a-KRAB are lentivirally transduced with single crRNAs targeting the HBG TSS or its known enhancer, HS2. Shown are HBG mRNA levels measured by RT-qPCR, normalized to GAPDH levels and averaged across 6-7 technical replicates from 2 independent experiments. Error bars denote SEM. One-sided unpaired Student's t-test was performed to compare untransduced control vs. each individual crRNA; asterisk denotes  $p < 0.05$ .

B) Genome browser view of the CD55 locus, including predicted enhancers using the activity-by-contact model and DNase-seq and H3K27Ac ChIP-seq tracks from ENCODE. K562 cells piggyBac-engineered to constitutively express multiAsCas12a-KRAB was transduced with 4-plex crRNA constructs targeting regions (R1-R11) in the CD55 locus, and R12 as a negative control region devoid of enhancer features. Each unique 4-plex crRNA construct is labeled as "a" or "b". For comparison, targeting the CD55 promoter using a 6-plex crRNA array (crCD55-4\_crB2M-1\_crKIT-2\_crKIT-3\_crCD81-1) is included. CD55 expression was assayed by flow cytometry between 9 and 11 days after crRNA transduction. One-sided Wilcoxon rank-sum test was performed on the median expression knockdown across 4-7 biological replicates for each crRNA construct, compared to the median expression knockdown of R12 (negative control region); asterisk indicates  $p < 0.01$ .

C) Comparison of CRISPRi targeting in K562 cells engineered to constitutively express multiAsCas12a-KRAB vs. opAsCas12a using a subset of lentivirally transduced crRNA constructs from B, plus a crRNA construct targeting a coding exon of CD55 as a positive control for knockdown by DNA cutting. CD55 expression was assayed by flow cytometry 11 days after crRNA transduction. One-sided Wilcoxon rank-sum test was performed to compare the median expression knockdown of multiAsCas12a-KRAB vs. opAsCas12a across 2-7 biological replicates; asterisk indicates  $p \leq 0.05$ .

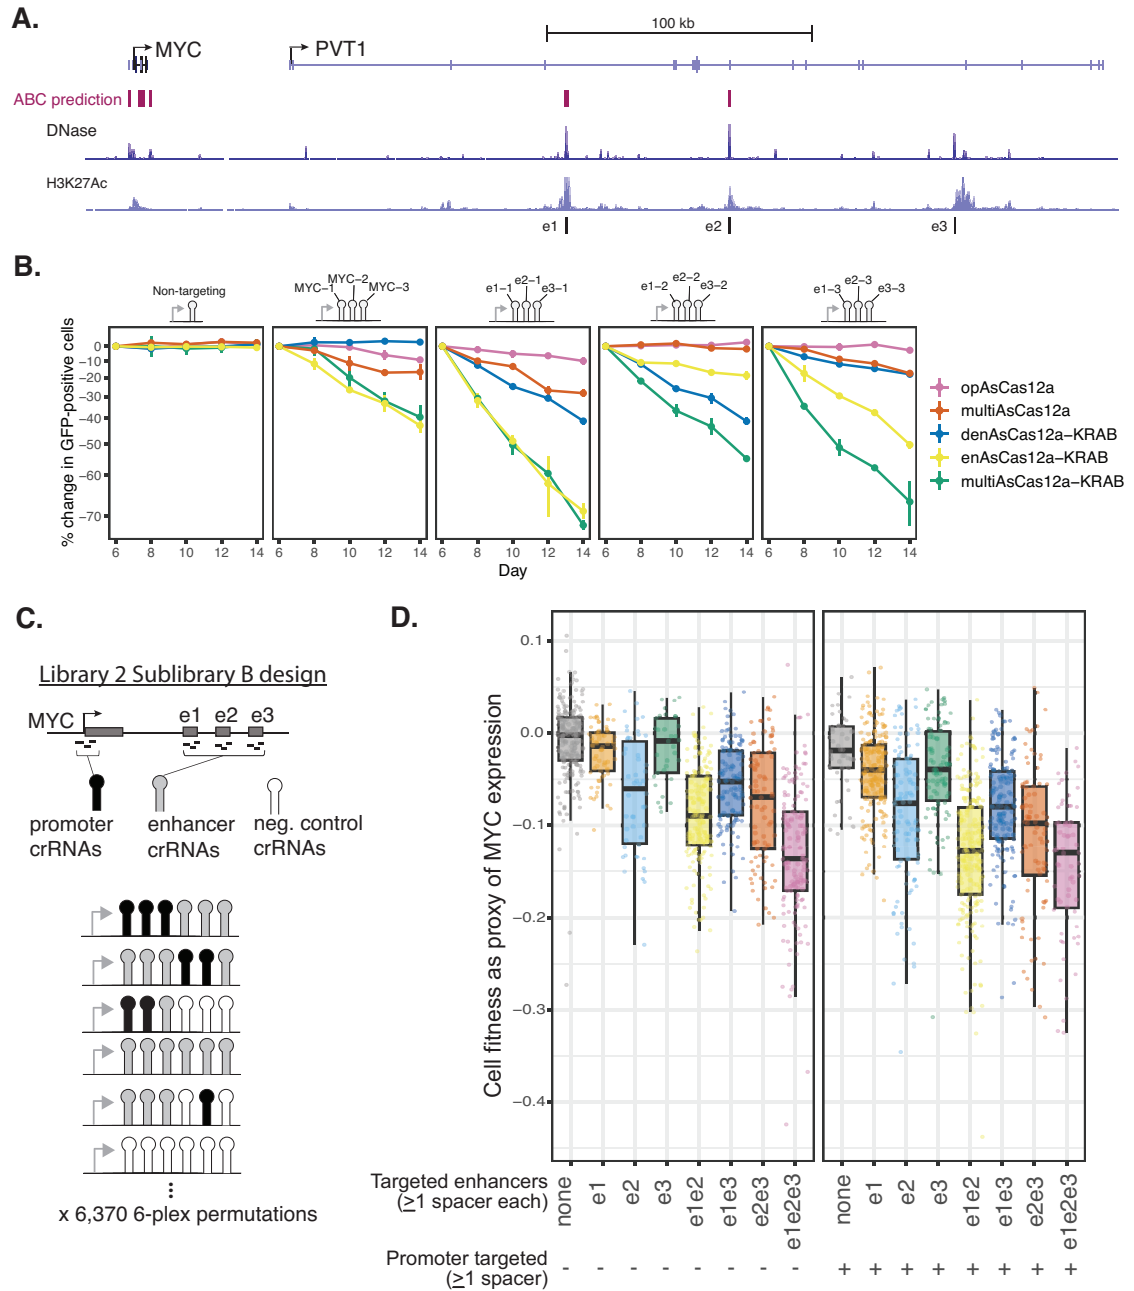

**Figure 6 – multiAsCas12a-KRAB enables combinatorial targeting of cis-regulatory elements in pooled CRISPRi screens.**

**A)** Genome browser view of the MYC locus, including activity-by-contact model predictions, and DNase-seq and H3K27Ac ChIP-seq tracks from ENCODE. 3 of the known MYC enhancers (e1, e2, e3) in the body of the non-coding RNA, PVT1, are shown.

**B)** K562 cells piggyBac-engineered to constitutively express the indicated panel of fusion protein constructs were transduced with one of 4 3-plex crRNA constructs targeting the MYC promoter or co-targeting the 3 enhancers using one crRNA per enhancer. Cell fitness as a proxy of MYC expression is measured as log<sub>2</sub> fold-change in percentage of cells expressing GFP marker on the crRNA construct, relative to day 6 after crRNA transduction. Shown are the average of 2 biological replicates, with error bars denoting the range.

**C)** 6,370 6-plex permutations of the 12 individual spacers from B, together with 3 intergenic negative control spacers, were designed and cloned as 6-plex crRNA arrays used in the design of Library 2 Sublibrary B.

**D)** Library 2 Sublibrary B: Analysis of 1,823 constructs with sufficient read coverage, categorized based on whether each contains at least one of 3 crRNAs that target the MYC promoter, and/or at least one crRNA that targets each of the MYC enhancers. Boxplots summarize cell fitness score distributions (as proxy of MYC expression) of all constructs that fall in each category. Boxplots show median, interquartile range, whiskers indicating 1.5x interquartile range, and are overlaid with individual data points each representing a 6-plex construct.

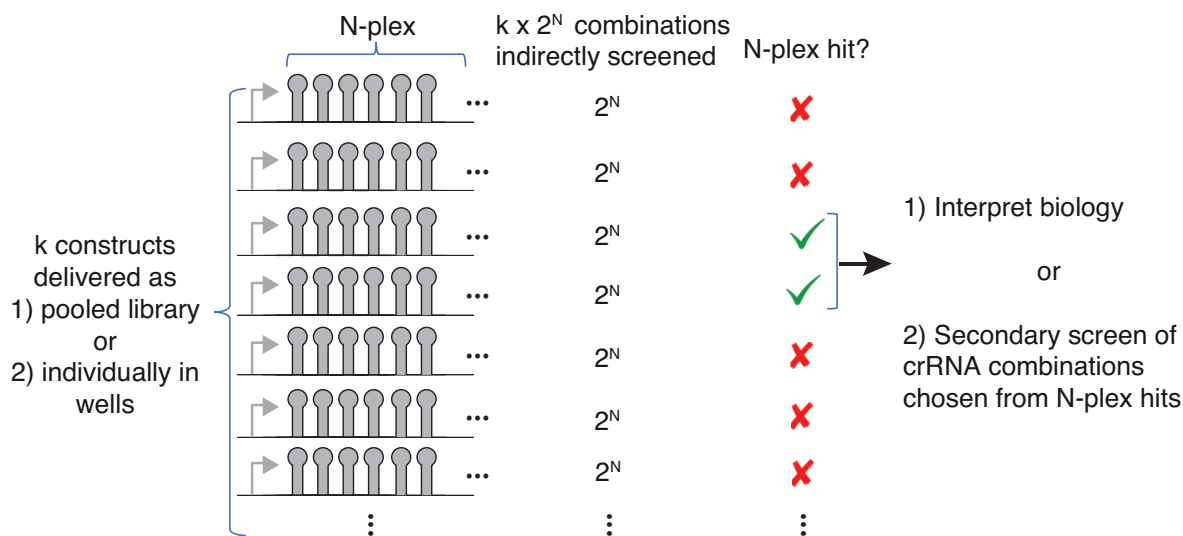

Figure 7 – Group testing framework for efficient exploration of combinatorial CRISPR perturbations.

## Supplemental Figures

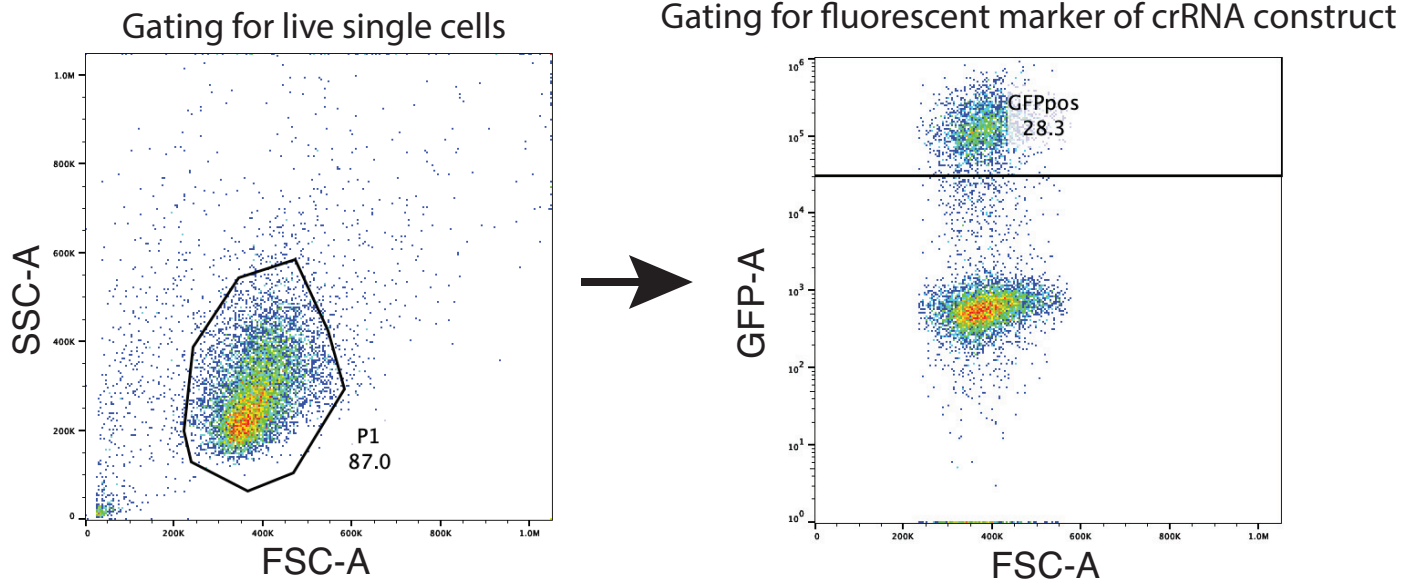

**Figure S1 – Example of flow cytometry gating strategy for CRISPRi experiments.** Example of the general gating strategy for CRISPRi experiments using flow cytometry readouts, shown for K562 cells as an example. Single live cells are gated by FSC vs. SSC, followed by gating for the fluorescent marker on the crRNA construct (typically GFP), which are subsequently analyzed for target gene expression in the respective fluorescence channels.

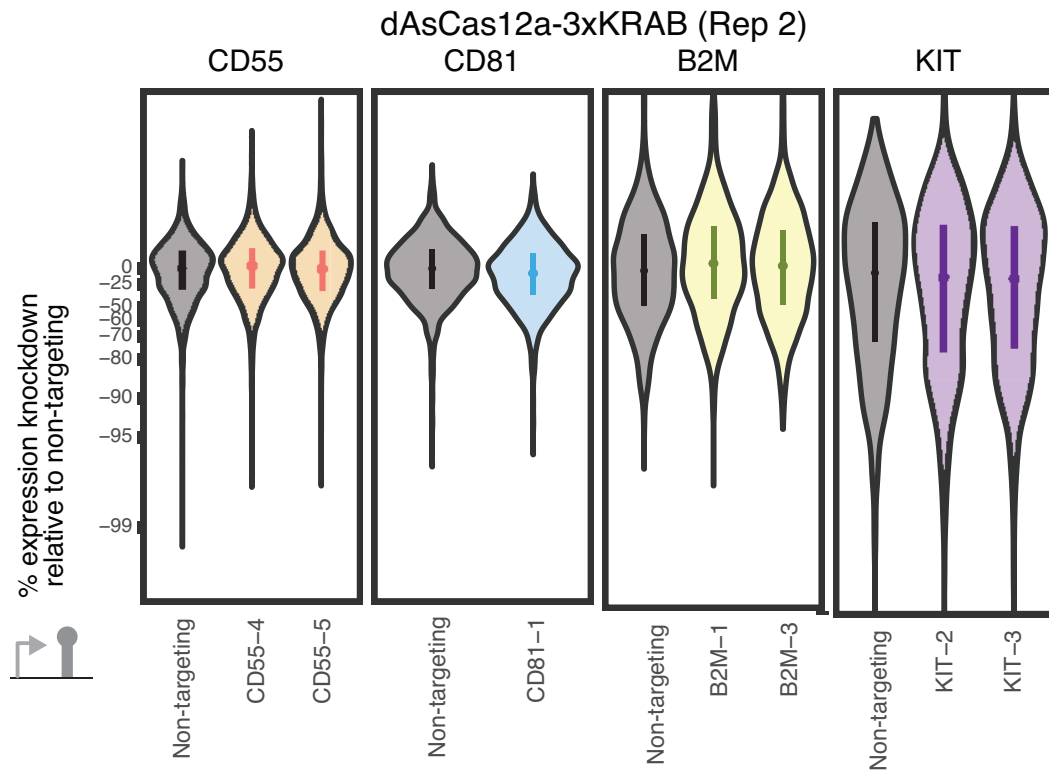

**Figure S2 – Additional replicate testing dAsCas12a-3xKRAB CRISPRi activity.**

Additional replicate for Fig. 1B testing CRISPRi activity of K562 cells piggyBac-engineered to constitutively express dAsCas12a-3xKRAB and using lentivirally delivered crRNA constructs. See Fig. 1B for details.



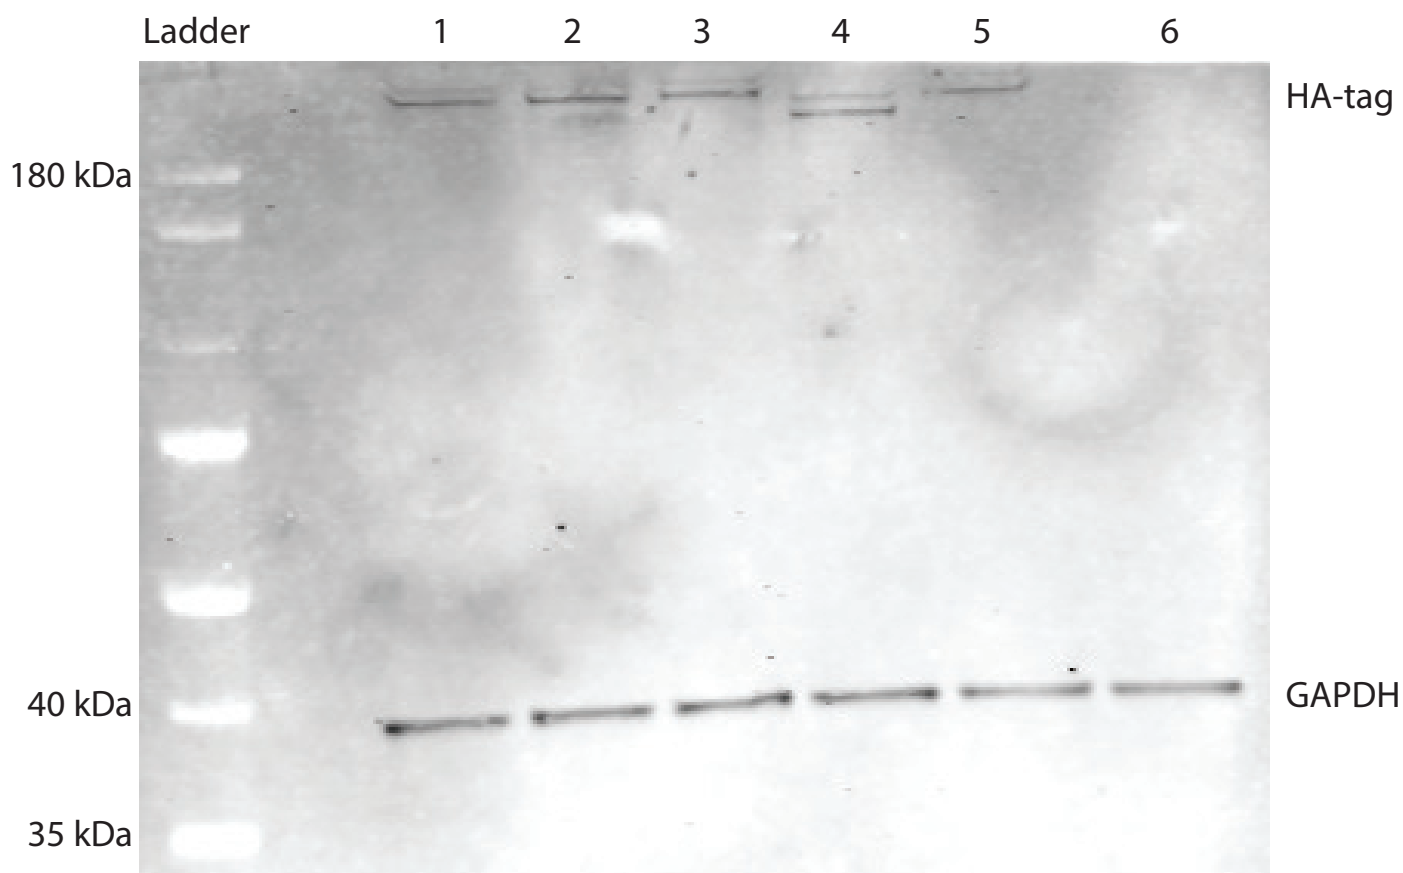

| Well | Protein construct                    | Plasmid ID   |
|------|--------------------------------------|--------------|
| 1    | multiAsCas12a-HA-XTEN80-KRAB-P2A-BFP | pCH61        |
| 2    | denAsCas12a-HA-XTEN80-KRAB-P2A-BFP   | pCH62        |
| 3    | enAsCas12a-HA-XTEN80-KRAB-P2A-BFP    | pNS49        |
| 4    | multiAsCas12a-HA-P2A-BFP             | pNS35        |
| 5    | dAsCas12a-3xKRAB-3xHA-P2A-BFP        | pCH68        |
| 6    | No construct                         | No construct |

**Figure S3 – Western blot of fusion proteins.** Western blot of whole-cell lysates prepared from K562 cells piggyBac engineered to constitutively express each of the fusion proteins in the panel. anti-HA tag was used for detection of the fusion protein and anti-GAPDH for detection of GAPDH as loading control.

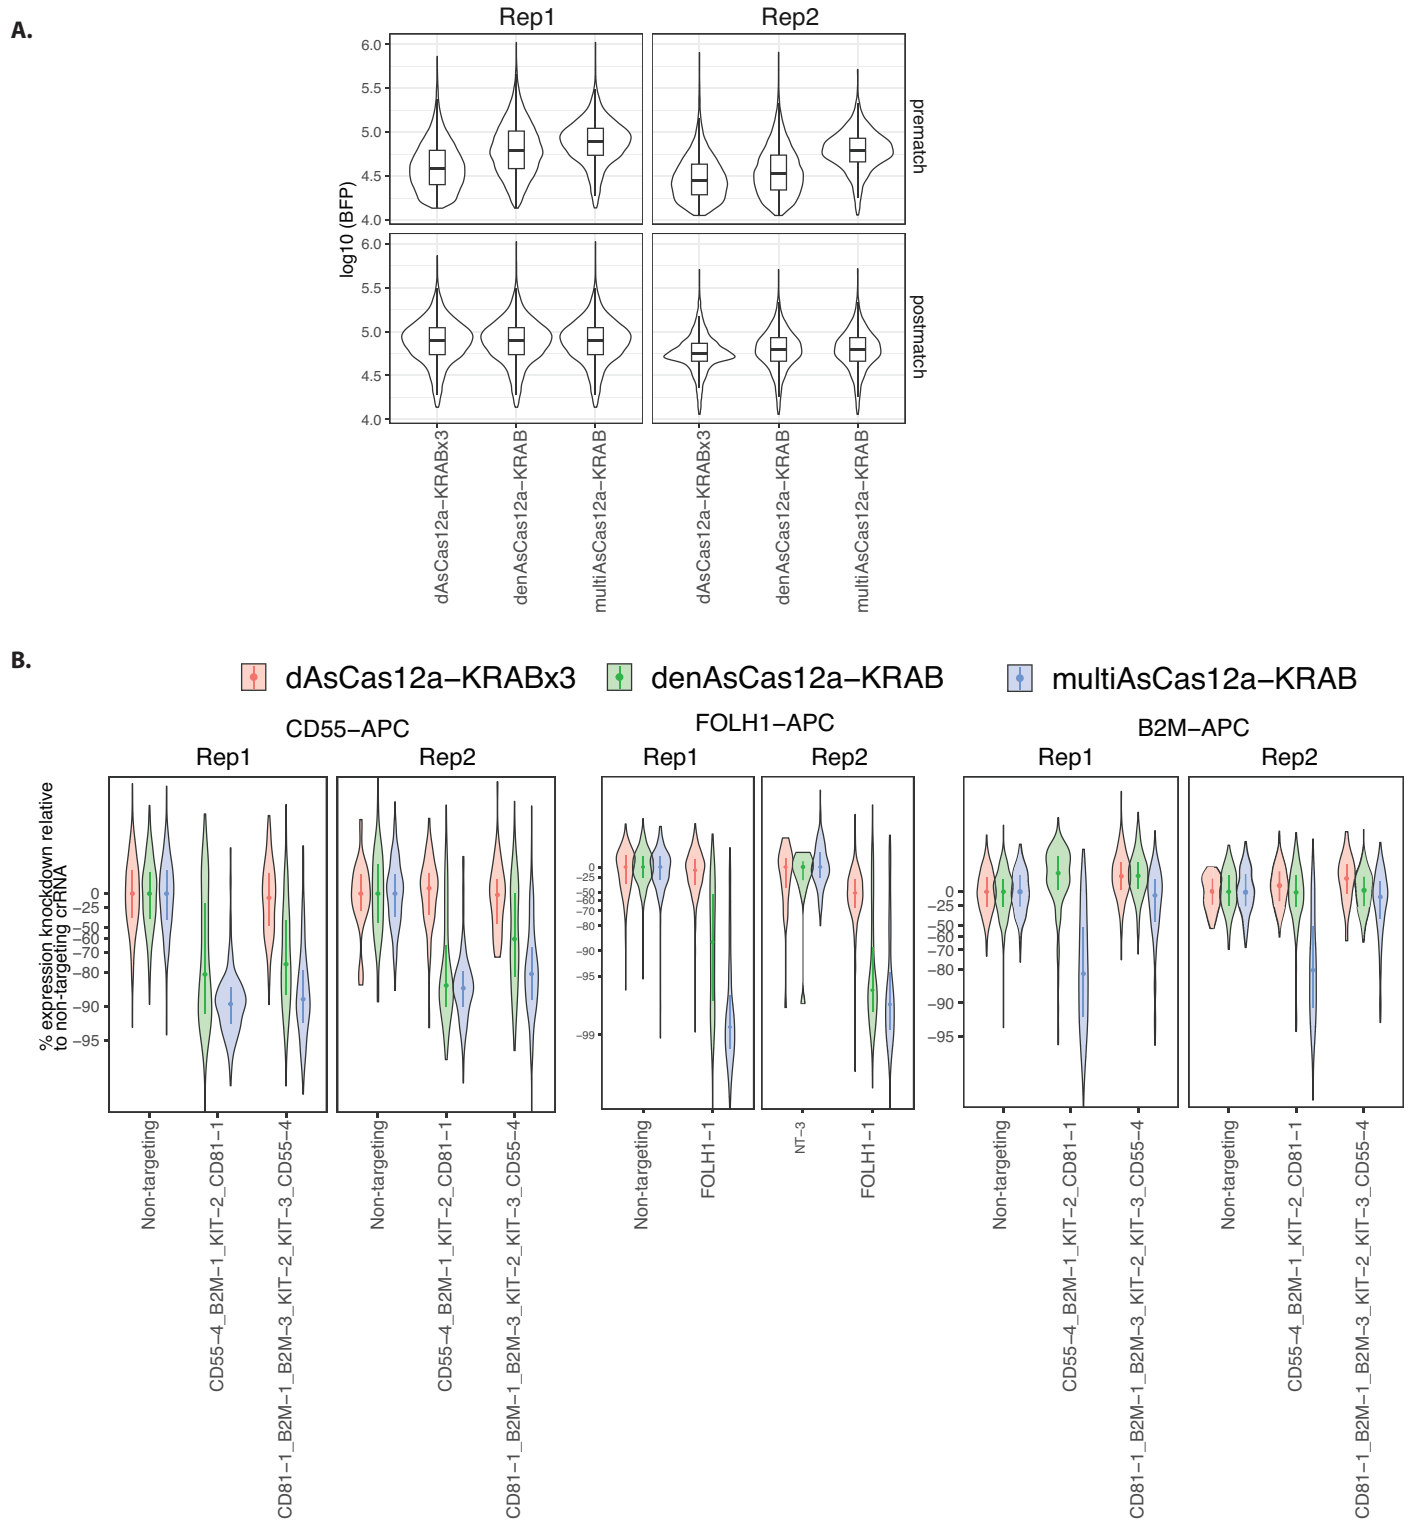

**Figure S4 – CRISPRi activity of multiCas12a-KRAB, denAsCas12a-KRAB, and dAsCas12a-KRABx3 in C42B cells.**

**A)** C4-2B cells piggyBac-engineered to constitutively express each of the fusion protein constructs are lentivirally transduced with the indicated crRNA constructs. Cells were sorted based on P2A-BFP marker signal. Because some of these cell lines showed slightly different levels of BFP signal as a proxy of fusion protein expression, to account for fusion protein expression we performed propensity score matching to subset for populations of cells for each fusion protein construct with the same distributions in BFP signals after data acquisition for flow cytometry in CRISPRi experiments. The BFP signals before and after matching are shown as violin blots overlaid with boxplots showing median and interquartile range.

**B)** Target gene expression are measured by cells surface antibody staining and flow cytometry 13-14 days after crRNA transduction. Single-cell distributions of expression knockdown relative to non-targeting crRNA are shown with mean and interquartile range indicated using the cells after propensity score matching for BFP levels as described in A. CRISPRi knockdown results are indistinguishable with and without propensity score matching (not shown).

## HEK 293T, dAsCas12a-KRABx3 Day6 co-transfection

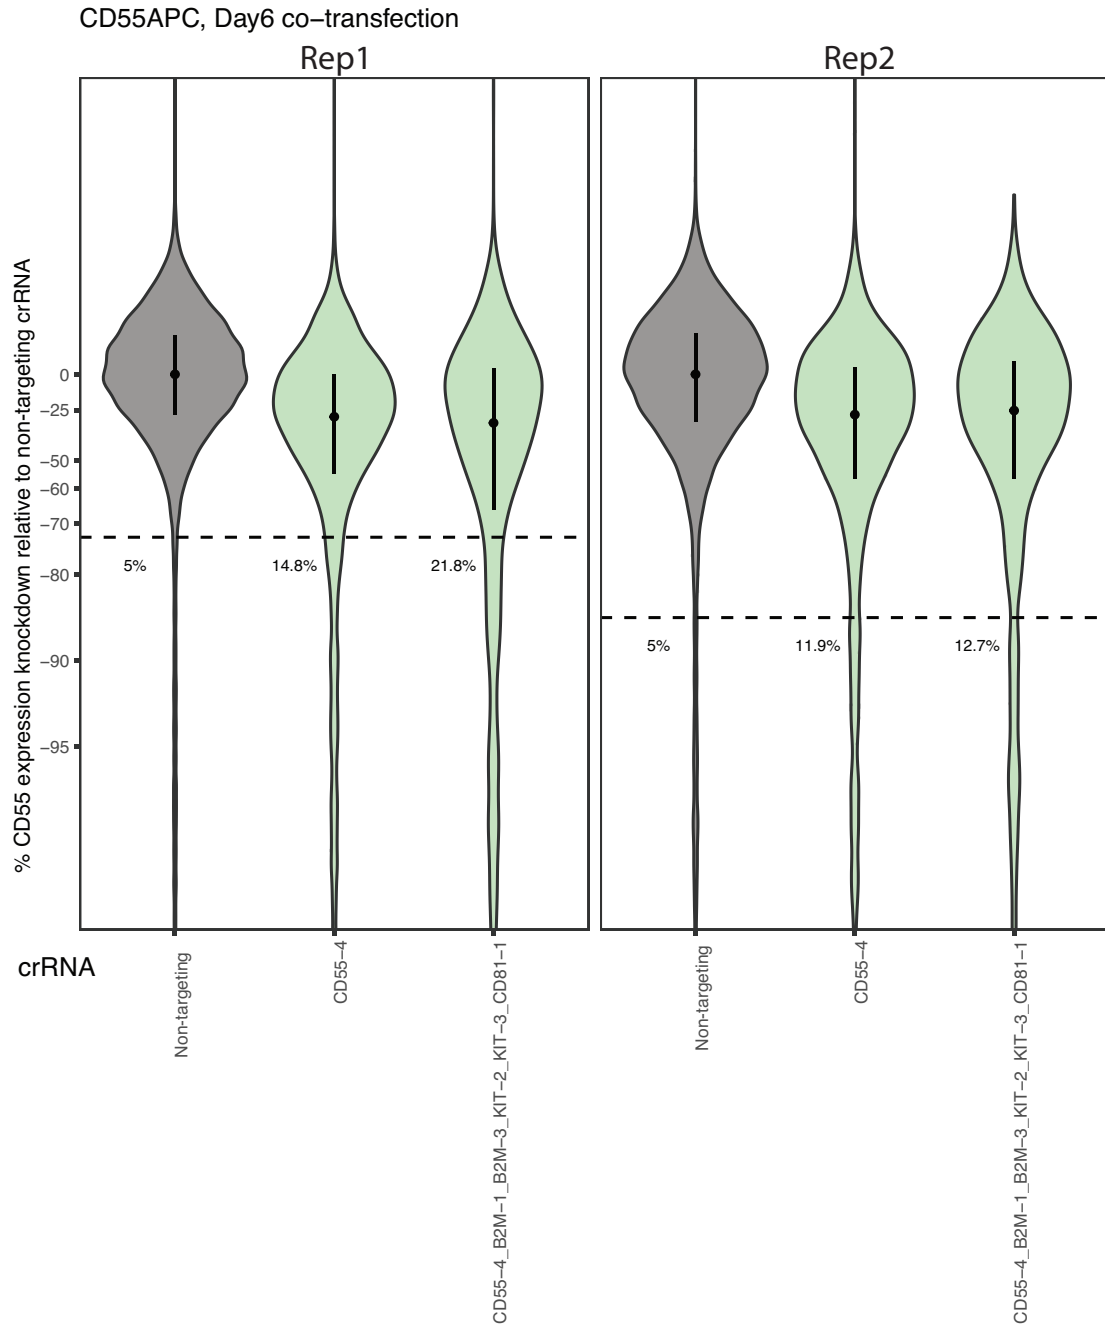

**Figure S5 – dAsCas12a-KRABx3 CRISPRi by transient transfection in HEK 293T cells.** HEK 293T cells were co-transfected with a plasmid encoding for dAsCas12a-KRABx3 and plasmids encoding for the indicated crRNA constructs targeting CD55. Cells were sorted 2 days after transfection for successful co-transfection based on BFP and GFP markers on the plasmids and CD55 expression was measured by antibody staining on flow cytometry 6 days after transfection. Violin plots of single-cell distributions of CD55 expression knockdown as a percentage of the median of non-targeting control are shown. Median and interquartile range are shown in the plot. The percentage of cells below the 5th percentile of the non-targeting control are also shown.

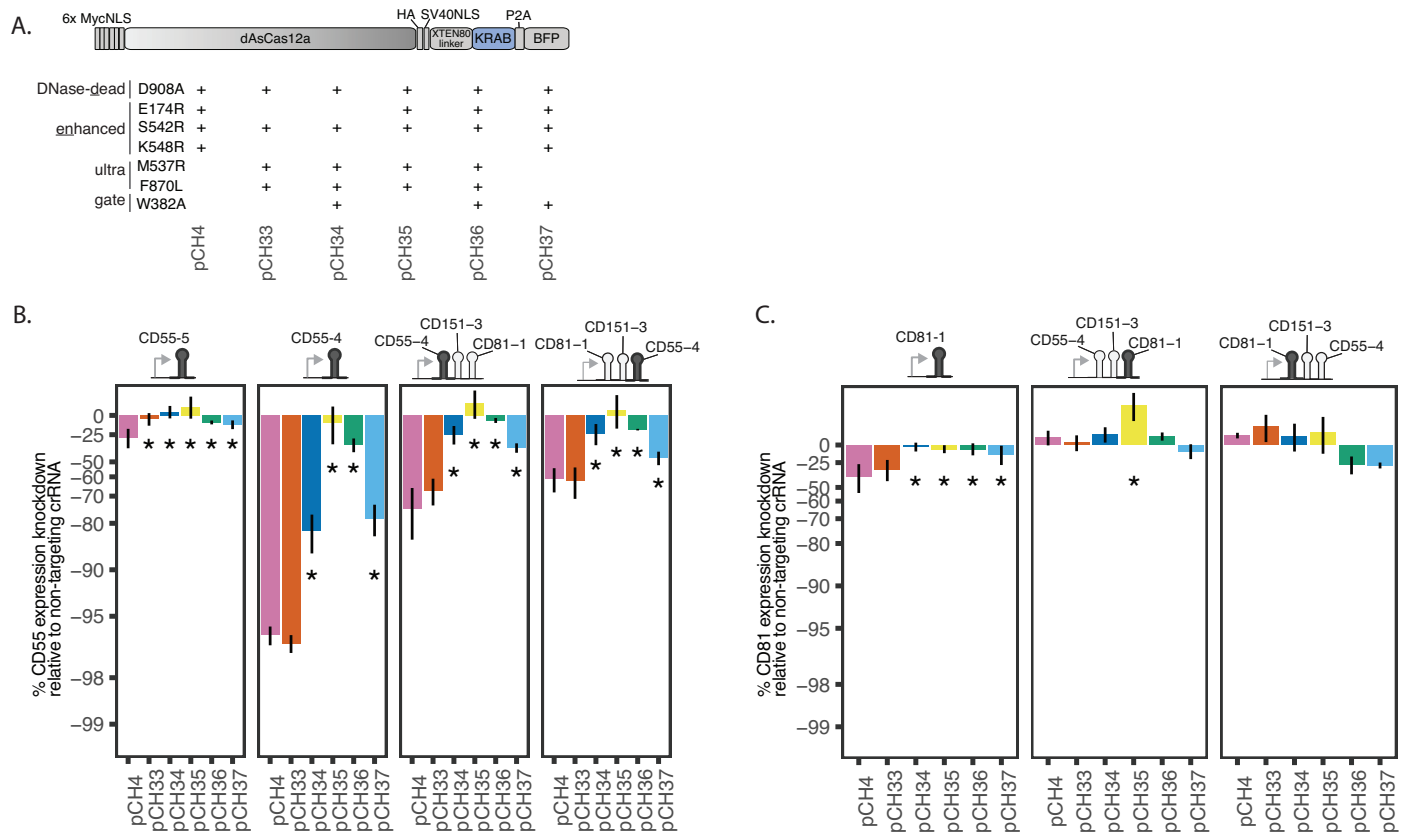

**Figure S6 – Comparisons of dAsCas12a variant fusion CRISPRi constructs using up to 3-plex crRNA constructs.**

**A)** The same fusion protein schematic as shown in Fig. 1C, labeled with construct IDs for ease of reference.

**B)** CD55 expression knockdown measured by flow cytometry using the indicated crRNA constructs and the panel of fusion protein constructs in A. Shown are averages of the median single-cell expression knockdown relative to non-targeting crRNA for 3 biological replicates (including the replicate for crCD55-4 shown in Fig. 1C) for all comparisons, except the comparison for crCD81-1\_crCD151-3\_crCD55-4 contains 2 replicates. One-sided Wilcoxon rank-sum test comparing denAsCas12a-KRAB (pCH4) to each of the other fusion constructs in the panel was performed. Asterisk indicates  $p < 0.01$  for all replicate-level comparisons for a given construct comparison.

**C)** Analogous to B, but for CD81 knockdown. Summaries shown for 3 biological replicates (including the replicate for crCD81-1 shown in Fig. 1C) for all comparisons, except the comparison for crCD81-1\_crCD151-3\_crCD55-4 contains 2 replicates.

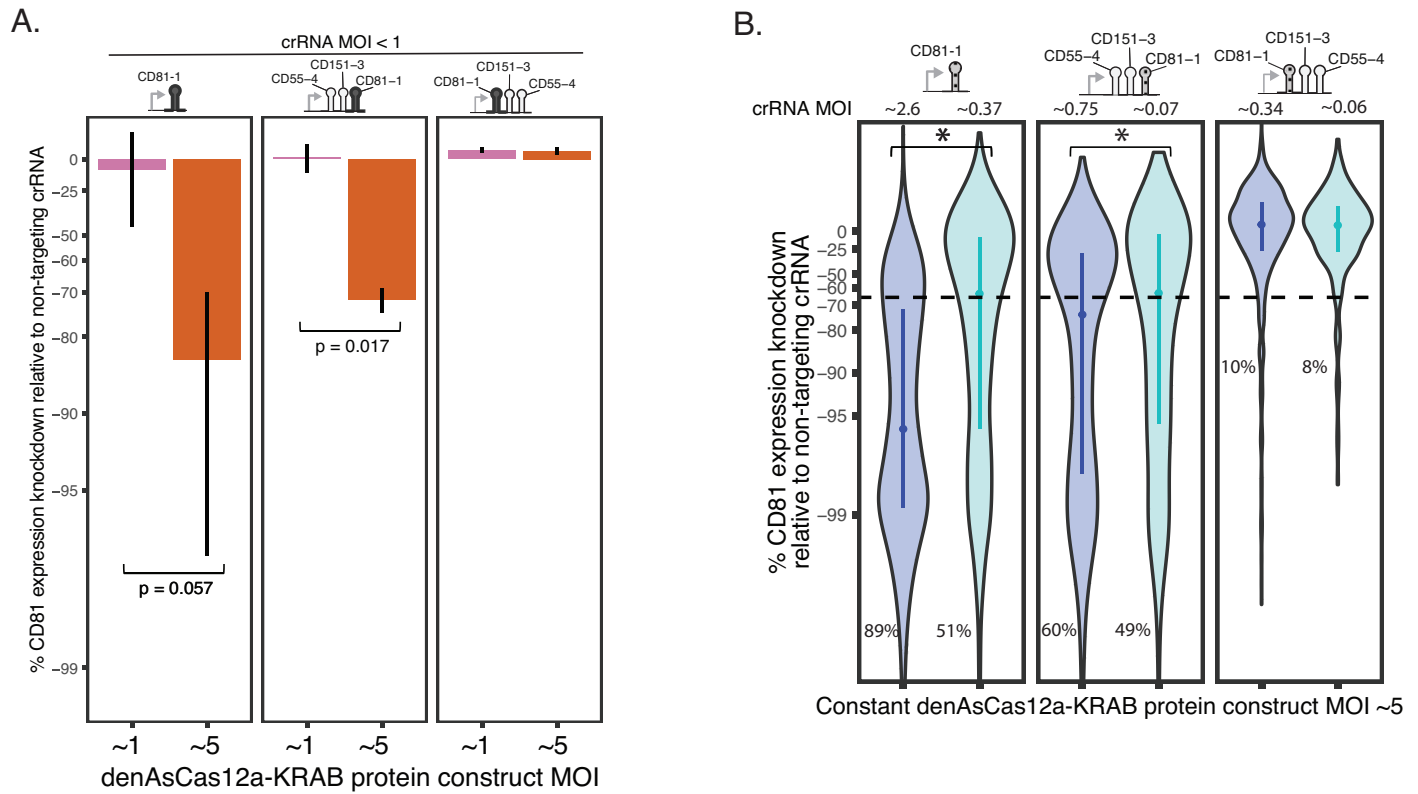

**Figure S7 – Additional replicates testing effect of dose on denAsCas12a-KRAB CRISPRi activity**

**A)** Summary of all replicates for experiment shown in Fig. 1D; shown are averages of median expression knockdown for each crRNA construct (N = 3-6 biological replicates for each crRNA construct, including the replicate shown in Fig. 1D). Error bars denote SEM. One-sided Wilcoxon rank-sum test was performed on the medians of single-cell expression knockdown of each replicate and p-values indicated where relevant.

**B)** Additional biological replicate for Fig. 1E testing denAsCas12a-KRAB CRISPRi activity with varying crRNA MOI while holding protein MOI constant; see Fig. 1E for details.

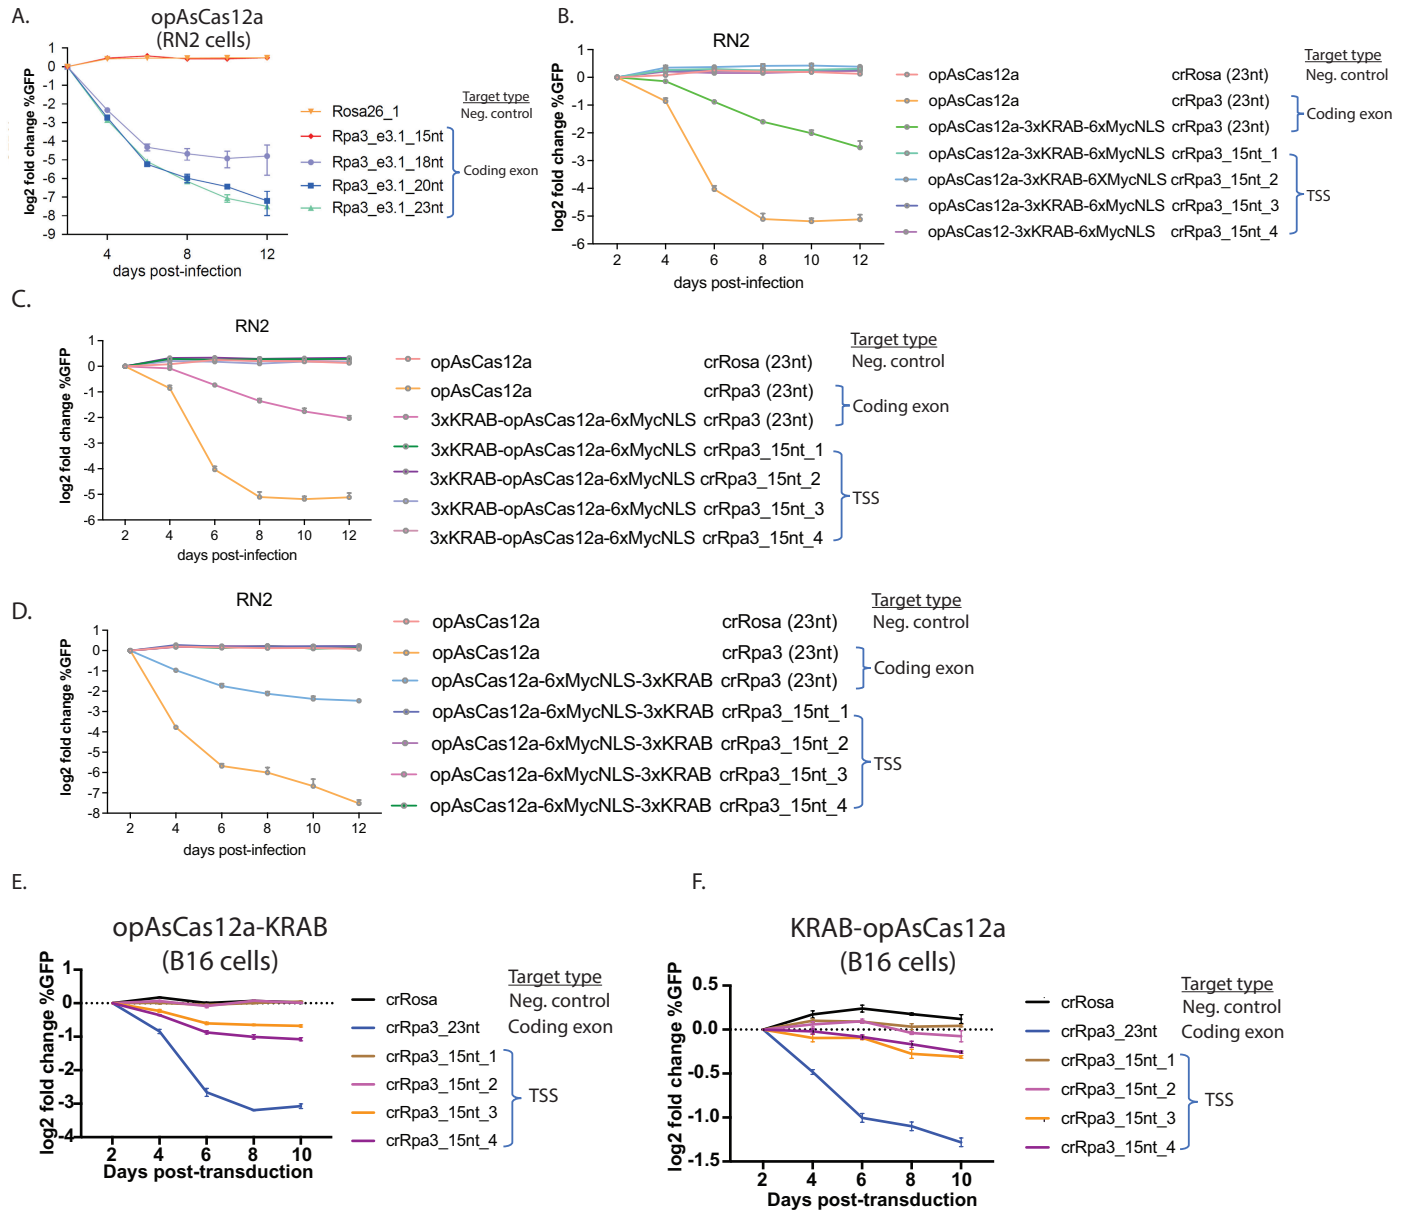

**Figure S8 – Testing CRISPRi activity of lentivirally delivered truncated crRNAs.** In all panels, the indicated cell line (RN2 or B16) was engineered for constitutive expression of the indicated fusion protein constructs by lentiviral transduction, followed by lentiviral transduction (at MOI between 0.3-0.4) of the indicated single-plex crRNA constructs containing spacers of the indicated lengths targeting Rpa3, an essential gene. The spacers target either the gene's coding exon, the TSS region, or the Rosa locus (negative control) as indicated in the legends. Cell fitness phenotype over time is measured in a competition assay by quantifying log<sub>2</sub> fold change in percent of cells expressing the GFP marker on the crRNA expression constructs (relative to day 2). Error bars indicate SEM for N = 3 biological replicates for all panels.



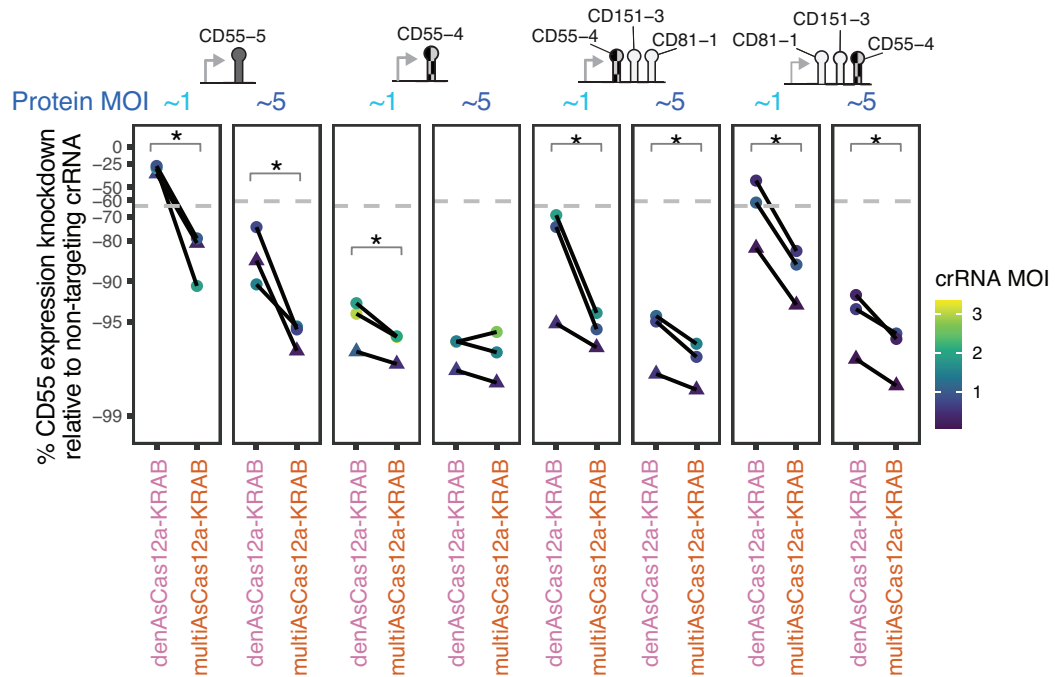

**Figure S10 – CD55 knockdown by denAsCas12a-KRAB vs. multiAsCas12a-KRAB at different protein MOIs.** Comparison of CD55 knockdown by lentivirally delivered denAsCas12a-KRAB vs. multiAsCas12a-KRAB at protein MOI ~1 vs. ~5 across a panel of single and 3-plex crRNA constructs, while holding constant crRNA MOI for each paired fusion protein comparison for each crRNA construct. Dashed gray line indicates 5th percentile of non-targeting crRNA control. crRNA MOI indicated by color scale. Lines connect paired replicates. One-sided Wilcoxon rank-sum tests were performed on single-cell distributions for each replicate, and asterisk denotes  $p < 0.01$  for all paired replicates within each condition. Dots indicate flow cytometry measurement 10 days after crRNA transduction; triangles indicate flow cytometry measurement 16 days after crRNA transduction.



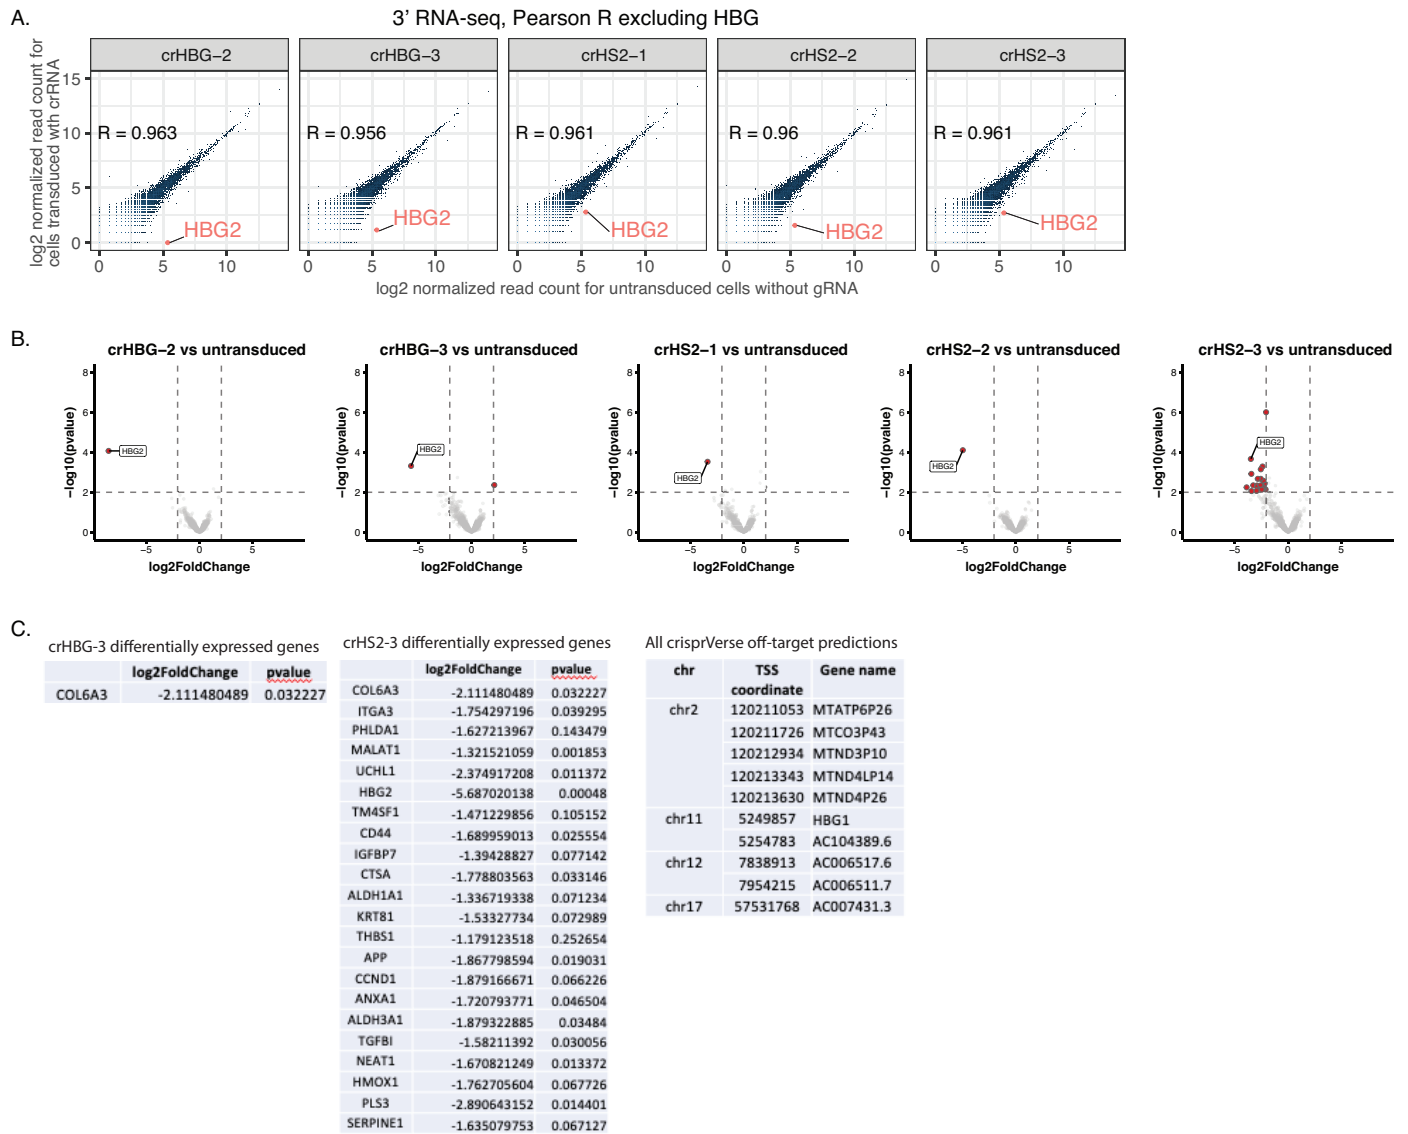

**Figure S11 – RNA-seq analysis of crRNA specificity.**

**A)** K562 cells lentivirally engineered (MOI ~5) to constitutively express multiCas12a-KRAB were either transduced with the indicated crRNA's at MOI <0.3, followed by sorting for crRNA-transduced cells based on GFP marker, or received no crRNAs. RNA was isolated from the sorted cells 32 days of culture after crRNA transduction and subjected to 3' RNA-seq. Scatter plot of normalized mRNA expression levels for crRNA transduced (1 biological replicate each) vs. cells without crRNA (2 biological replicates), and Pearson correlation coefficient calculated for the transcriptome, excluding HBG. RT-qPCR quantifications are shown in Fig. 5A.

**B)** Volcano plots of p-values vs. log2FoldChange from differential expression analysis using DE-seq2 are shown. Genes that fall beyond p-value and log2FoldChange cutoffs (dashed lines) are highlighted.

**C)** Lists of differentially expressed genes (other than HBG) from the analysis in B for the crHBG-3 and crHS2-3 transduced cells are shown. For comparison, a list of all off-target predictions generated by crisprVerse are shown for all crRNAs in the panel in A and B.

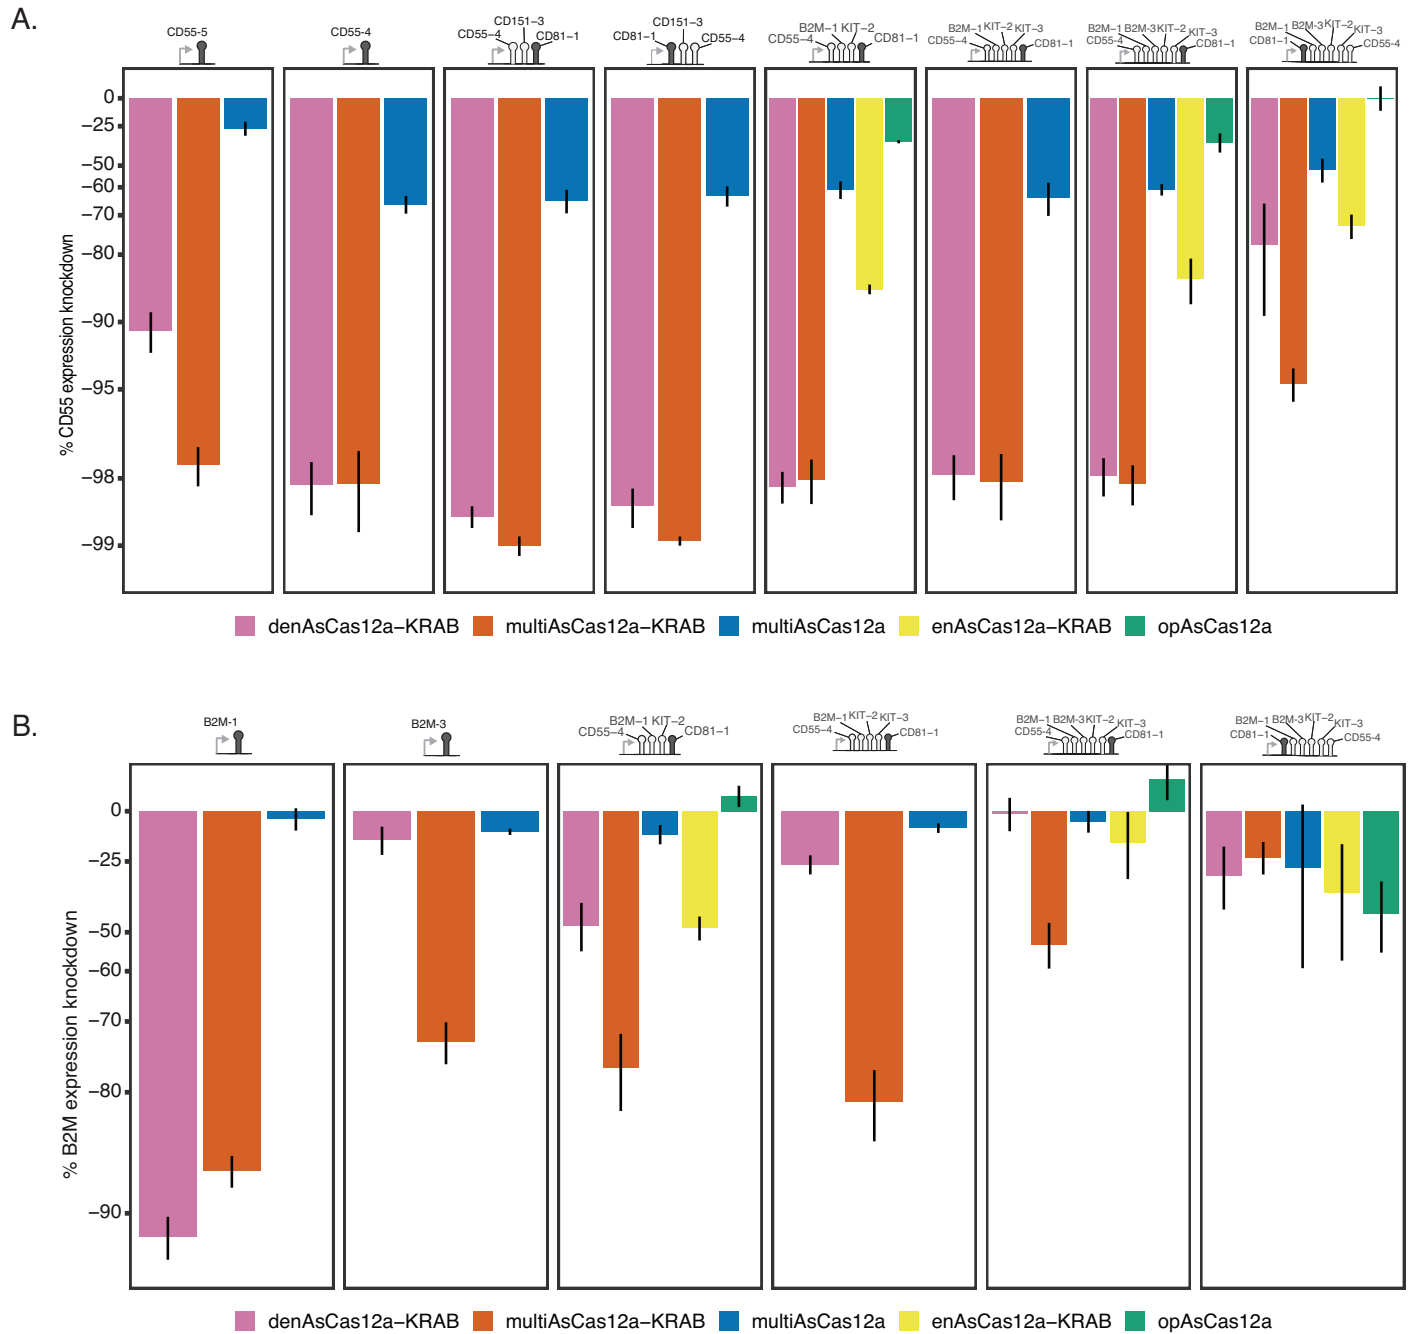

**Figure S12 – CRISPRi knockdown of CD55 and B2M using up to 6-plex crRNA arrays.** Analogous to Fig. 3B-C, but shown for CD55 and B2M knockdown on day 6 after crRNA transduction, measured by antibody staining of those targets using flow cytometry. Shown are averages of median single-cell expression knockdown from 2-5 biological replicates for each crRNA construct, with error bars indicating SEM.

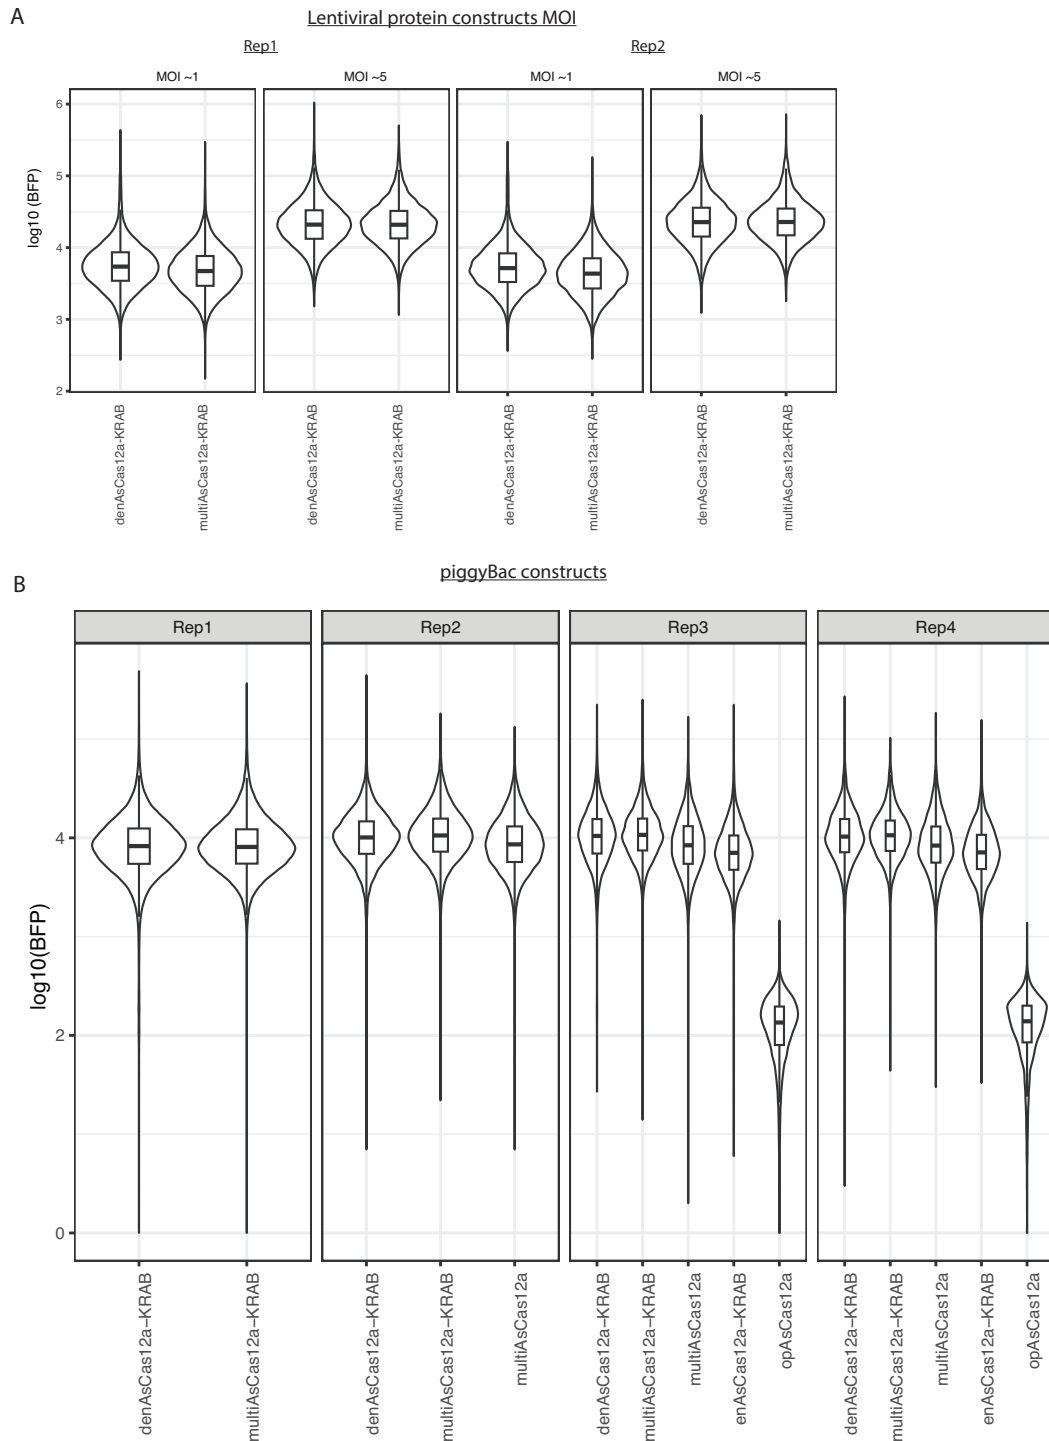

**Figure S13 – Monitoring P2A-BFP reporter as proxy of fusion protein expression level.**

**A)** K562 cells lentivirally engineered (at MOI ~1 or MOI ~5) to constitutively express the indicated fusion protein constructs were monitored for P2A-BFP expression levels by flow cytometry. Shown are representative biological replicates from routine monitoring.

**B)** Same as A for K562 cells piggyBac-engineered to constitutively express the indicated fusion protein constructs. opAsCas12a does not contain BFP reporter and is shown as fluorescence negative control. Shown are representative biological replicates from routine monitoring.

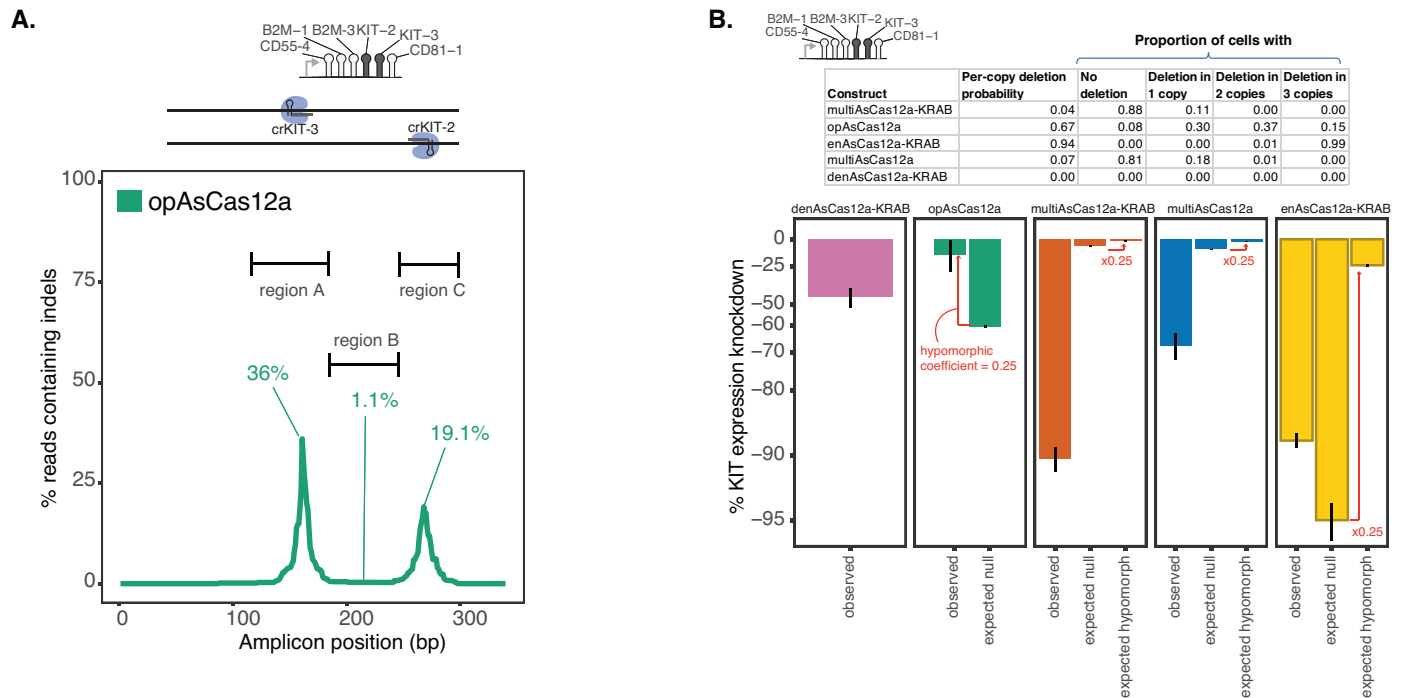

**Figure S14 – Indel quantification and gene expression knockdown simulation for dual-targeting of the KIT TSS region.**

**A)** Related to Fig. 3D. Indel quantification of PCR amplicon near the KIT TSS region in K562 cells lentivirally engineered to constitutively express opAsCas12a 15 days after transduction of the indicated 6-plex crRNA array (sorted for crRNA transduced cells on 2 days after transduction). Note that opAsCas12a is encoded in a different expression backbone (using a puromycin selectable marker and thus is not directly matched to other fusion constructs in Fig. 3D in transgenic expression level.

**B)** Based on the observed indel allelic frequencies in A and Fig. 3D, we calculated the expected proportion of cells that harbor a specified number of DNA copies containing indels of any size within the PCR amplicon, assuming indels induced by crKIT-2 and crKIT-3 occur independently across DNA copies within each cell. We purposefully overestimate these indel frequencies as an adversarial test in favor of the impact of indels on gene expression (see Methods). Based on these proportions we simulated the expected distribution of single-cell gene expression levels under the assumption that knockdown were solely due to genetically null deletions of any size abolishing KIT expression in cis (“expected null”). Expected knockdown under this genetic null assumption exceeds that observed for opAsCas12a (fully active DNase), demonstrating the genetic null assumption is an overestimate of gene expression effects of indels in this region. To correct for this overestimate, we use the ratio of observed vs. expected null median expression knockdown by opAsCas12a as an estimate of the hypomorphic effect of deletions in this region (“hypomorphic coefficient”). We multiply the expected null median expression knockdown for all other fusion proteins by this hypomorphic coefficient to obtain an “expected hypomorph” median expression knockdown, which we propose as our final estimate of the effects arising from indels. The observed knockdown values are the same as shown in Fig. 3D.

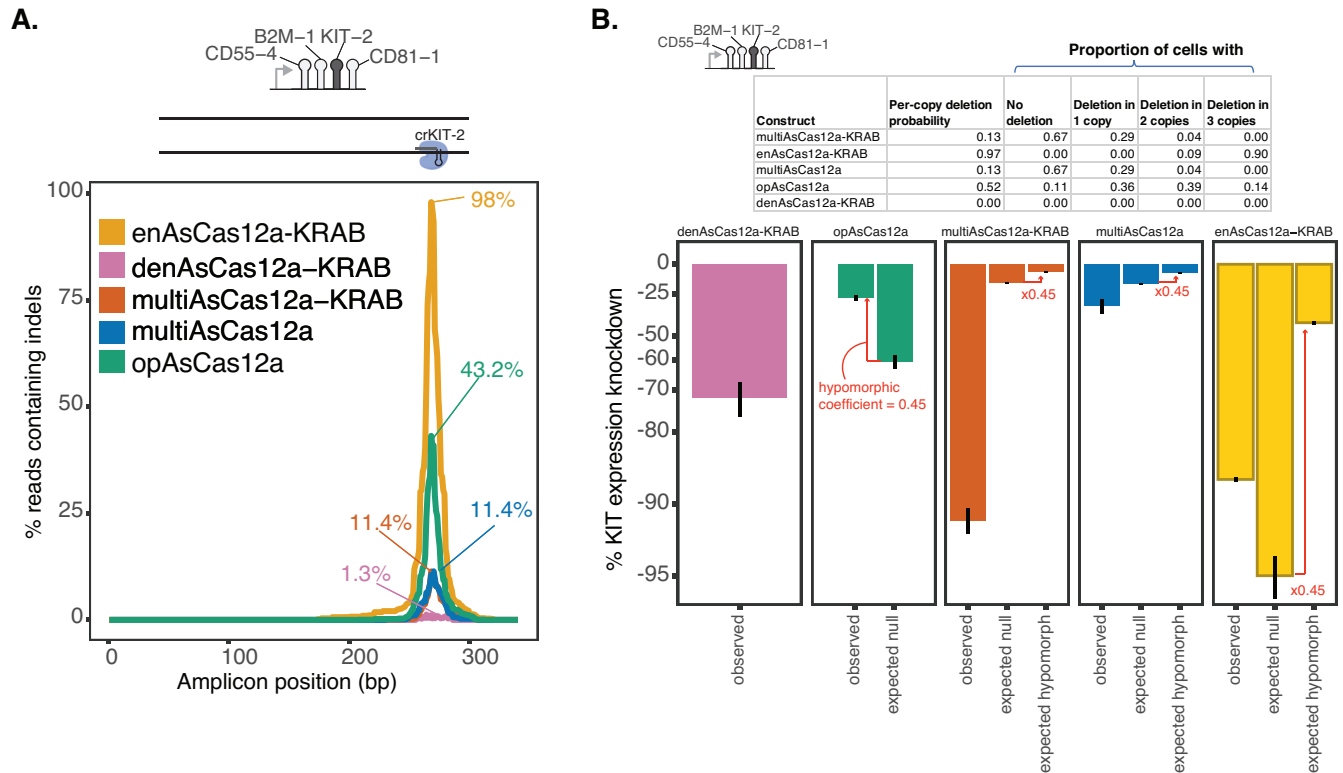

**Figure S15 – Indel quantification and gene expression knockdown simulation for single-targeting of the KIT TSS region.**

**A)** Indel quantification analogous to Fig. 3D, but for a single-site targeting of the KIT TSS region using crKIT-2 encoded within the indicated 4-plex crRNA array.

**B)** Analogous to Fig. S14B, we simulated expected gene expression knockdown (see Methods) under the assumption that knockdown were solely due to genetically null deletions of any size abolishing KIT expression in cis (“expected null”). Expected knockdown under this genetic null assumption exceeds that observed for opAsCas12a (fully active DNase), demonstrating the genetic null assumption is an overestimate of gene expression effects of indels in this region. To correct for this overestimate, we use the ratio of observed vs. expected null median expression knockdown by opAsCas12a as an estimate of the hypomorphic effect of deletions in this region (“hypomorphic coefficient”). We multiply the expected null median expression knockdown for all other fusion proteins by this hypomorphic coefficient to obtain an “expected hypomorph” median expression knockdown, which we propose as our final estimate of the effects arising from indels.

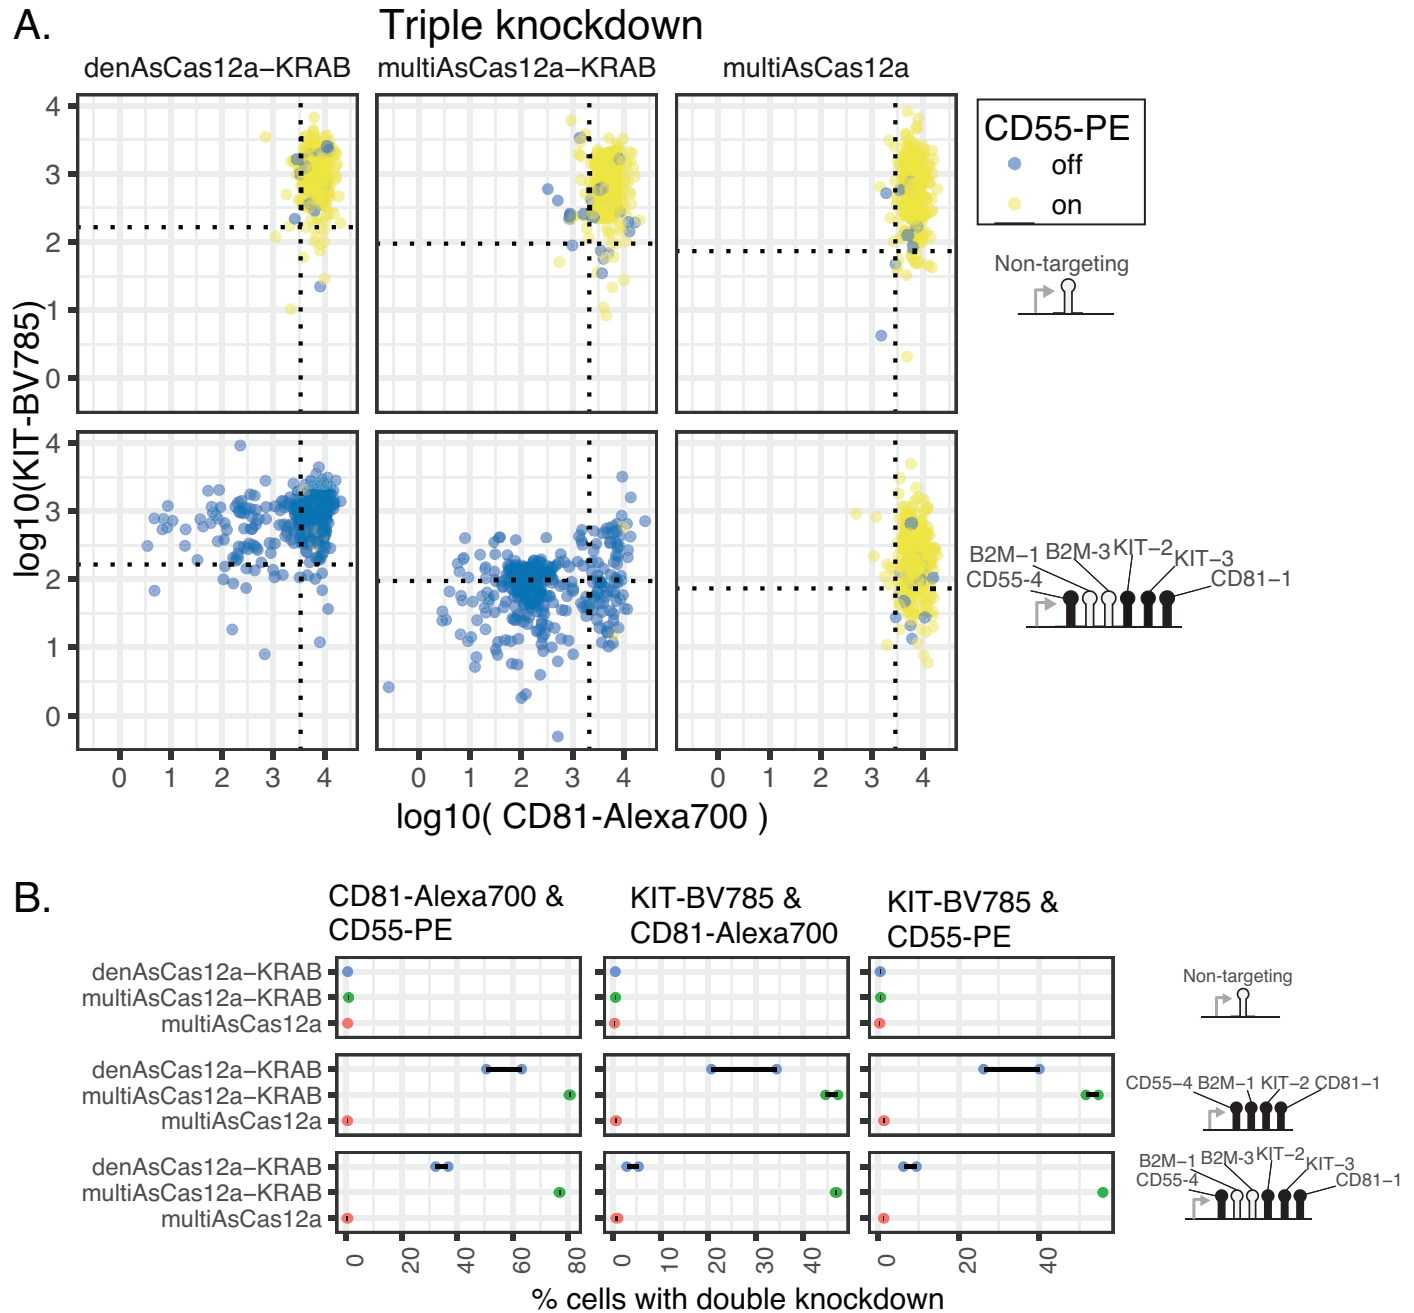

**Figure S16 – Double and triple gene knockdown by CRISPRi using higher-order crRNA arrays.**

A) Single-cell view of CD81, KIT, and CD55 3-way knockdown using a 6-plex crRNA construct in K562 cells piggyBac-engineered to constitutively express each of the indicated fusion protein constructs, measured by multiplexed flow cytometry. Summary of percentage of cells with triple knockdown is shown in Fig. 3G.

B) Quantification of the fraction of cells showing double-knockdown of pairs of target genes in the experiment described in A for 4-plex and 6-plex crRNA arrays. Double knockdown is defined as the fraction of cells with expression below the 5th percentile for the non-targeting crRNA for the expression of a given pair of target genes.

**A.**

| Library 1 (single-plex)                                                          | TSS-targeting constructs | Negctrl-intergenic | Negctrl-unmapped |
|----------------------------------------------------------------------------------|--------------------------|--------------------|------------------|
| # constructs                                                                     | 77387                    | 524                | 445              |
| # genes targeted                                                                 | 559                      |                    |                  |
| <b>For constructs with <math>\geq 1</math> RPM</b>                               |                          |                    |                  |
| # constructs                                                                     | 76293                    | 524                | 445              |
| # constructs targeting TTTV PAM                                                  | 3326                     |                    |                  |
| # target genes with $>0$ crRNA exceeding fitness score of 1%tile of neg controls | 450                      |                    |                  |
| # target genes shared with prior dCas9 CRISPRi screens                           | 240                      |                    |                  |

  

**B.**

| Library 2 (6-plex)                                                                                                            | Sublibrary A (positional shuffling) | Neg-ctrl only arrays |
|-------------------------------------------------------------------------------------------------------------------------------|-------------------------------------|----------------------|
| # constructs                                                                                                                  | 84275                               | 2000                 |
| <b>For constructs with <math>\geq 1</math> RPM</b>                                                                            |                                     |                      |
| # constructs                                                                                                                  | 67534                               | 324                  |
| # constructs with TSS-targeting spacer in test position                                                                       | 44802                               | NA                   |
| # constructs with neg control spacer in test position                                                                         | 12029                               | NA                   |
| # constructs with TSS-targeting spacer in test position exceeding fitness score of 1%tile of neg controls in Library 1 screen | 2987                                | NA                   |
| # unique TSS-targeting spacers in test position exceeding fitness score of 1%tile of neg controls in Library 1 screen         | 123                                 | NA                   |
| # unique neg control spacers in test position                                                                                 | 506                                 | NA                   |

  

**C.**

| Library 2 (6-plex)                                 | Sublibrary B (MYC locus)                                        | Neg-ctrl only arrays |
|----------------------------------------------------|-----------------------------------------------------------------|----------------------|
| # constructs                                       | 6370                                                            | 2000                 |
| <b>For constructs with <math>\geq 1</math> RPM</b> |                                                                 |                      |
| # constructs                                       | 1823                                                            | 324                  |
|                                                    | <b>Enhancer-targeting (<math>\geq 1</math> for each listed)</b> | <b># constructs</b>  |
| $\geq 1$ promoter targeting spacer                 | none                                                            | 48                   |
| none                                               | none                                                            | 197                  |
| $\geq 1$ promoter targeting spacer                 | e1                                                              | 187                  |
| none                                               | e1                                                              | 65                   |
| $\geq 1$ promoter targeting spacer                 | e2                                                              | 108                  |
| none                                               | e2                                                              | 50                   |
| $\geq 1$ promoter targeting spacer                 | e3                                                              | 90                   |
| none                                               | e3                                                              | 33                   |
| $\geq 1$ promoter targeting spacer                 | e1e2                                                            | 216                  |
| none                                               | e1e2                                                            | 164                  |
| $\geq 1$ promoter targeting spacer                 | e1e3                                                            | 161                  |
| none                                               | e1e3                                                            | 121                  |
| $\geq 1$ promoter targeting spacer                 | e2e3                                                            | 84                   |
| none                                               | e2e3                                                            | 90                   |
| $\geq 1$ promoter targeting spacer                 | e1e2e3                                                          | 64                   |
| none                                               | e1e2e3                                                          | 145                  |

**Figure S17 – Summaries of Library 1 and Library 2 screens.**

A) Summary of crRNA constructs in the Library 1 screen.

B) Summary of crRNA constructs in the Library 2, Sublibrary A screen.

C) Summary of crRNA constructs in the Library 2, Sublibrary B screen.

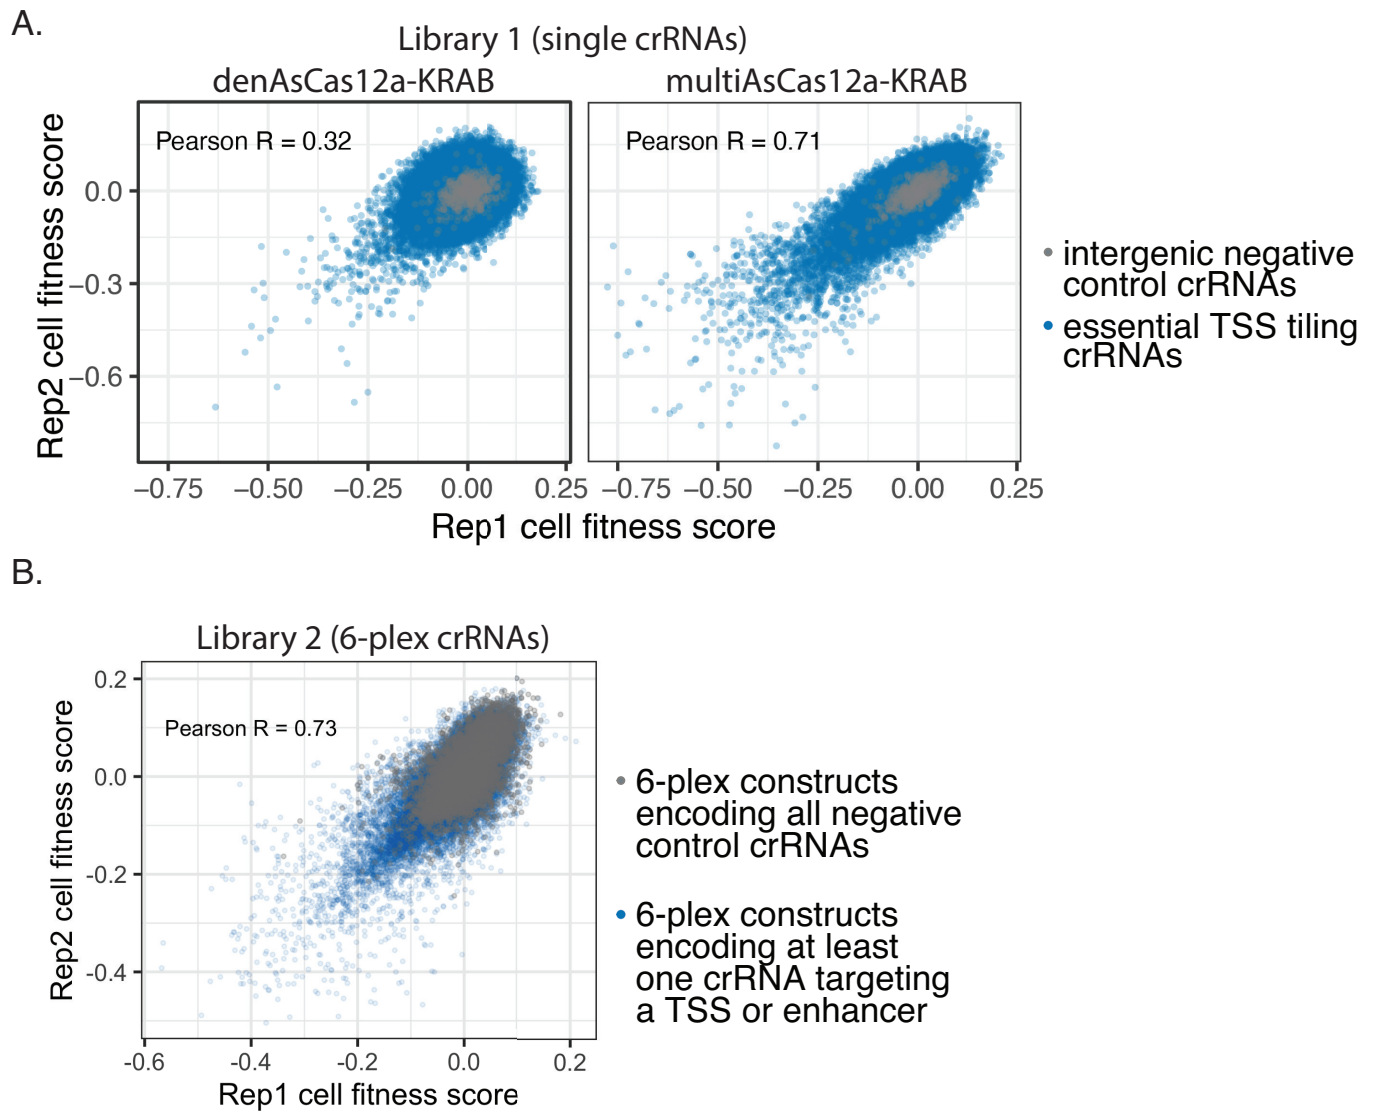

**Figure S18 – Screen replicate concordance for Library 1 and Library 2.** Shown are 2D density plots of cell fitness scores for individual crRNA constructs in **A)** Library 1 and **B)** Library 2 (Sublibrary A and Sublibrary B), with the Pearson correlation coefficients calculated for all constructs in each library shown.



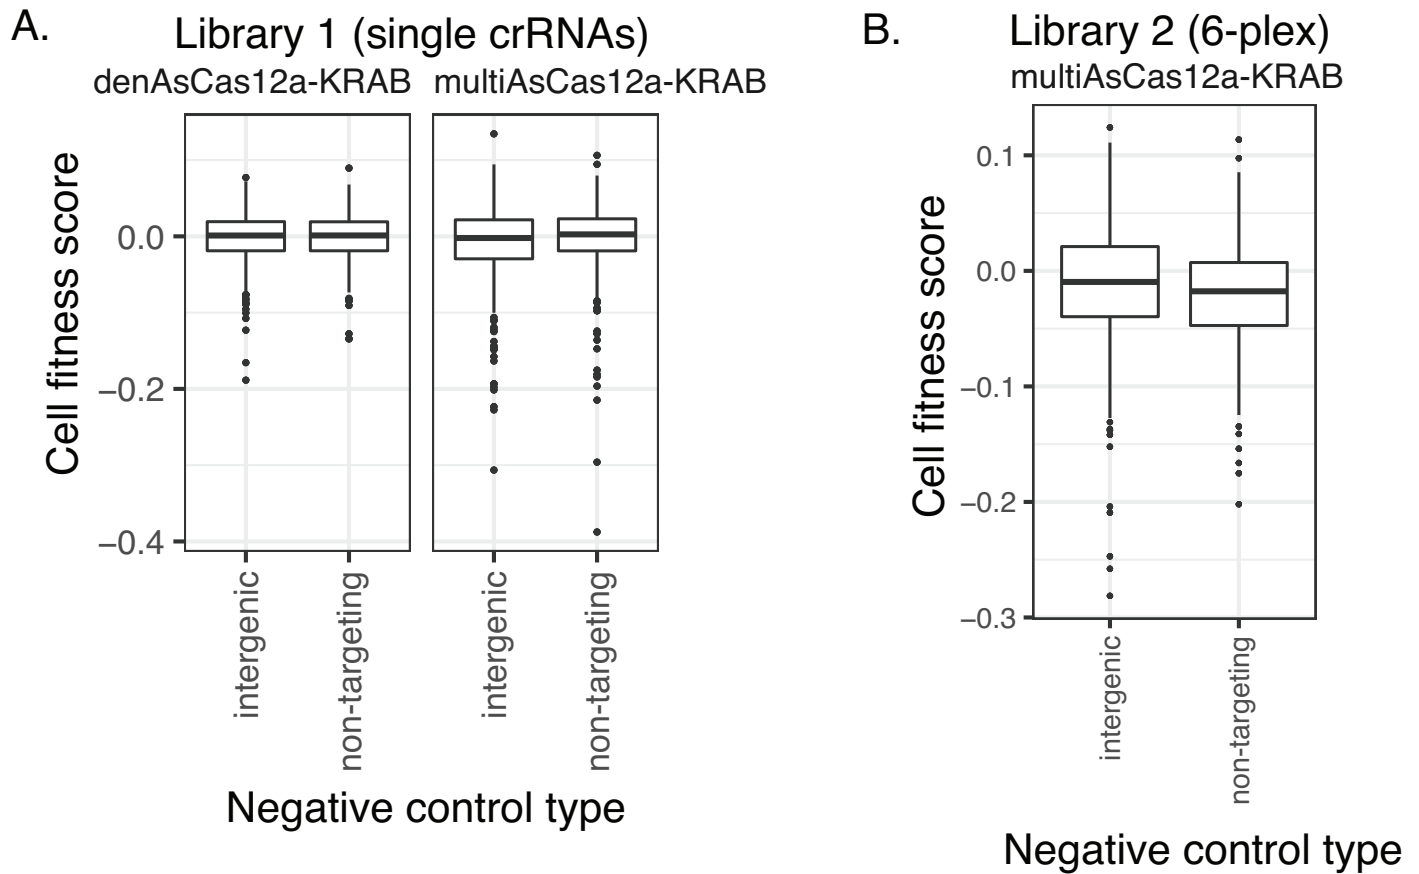

**Figure S19 – Cell fitness score distributions of intergenic vs. non-targeting negative control crRNAs.** Boxplots of cell fitness scores for **A)** Library 1 single-crRNA constructs, and **B)** Library 2 6-plex constructs, categorized by whether the construct encodes exclusively intergenic vs. non-targeting negative control crRNAs. Boxplots display median, interquartile range, whiskers indicating 1.5x interquartile range, and outliers.

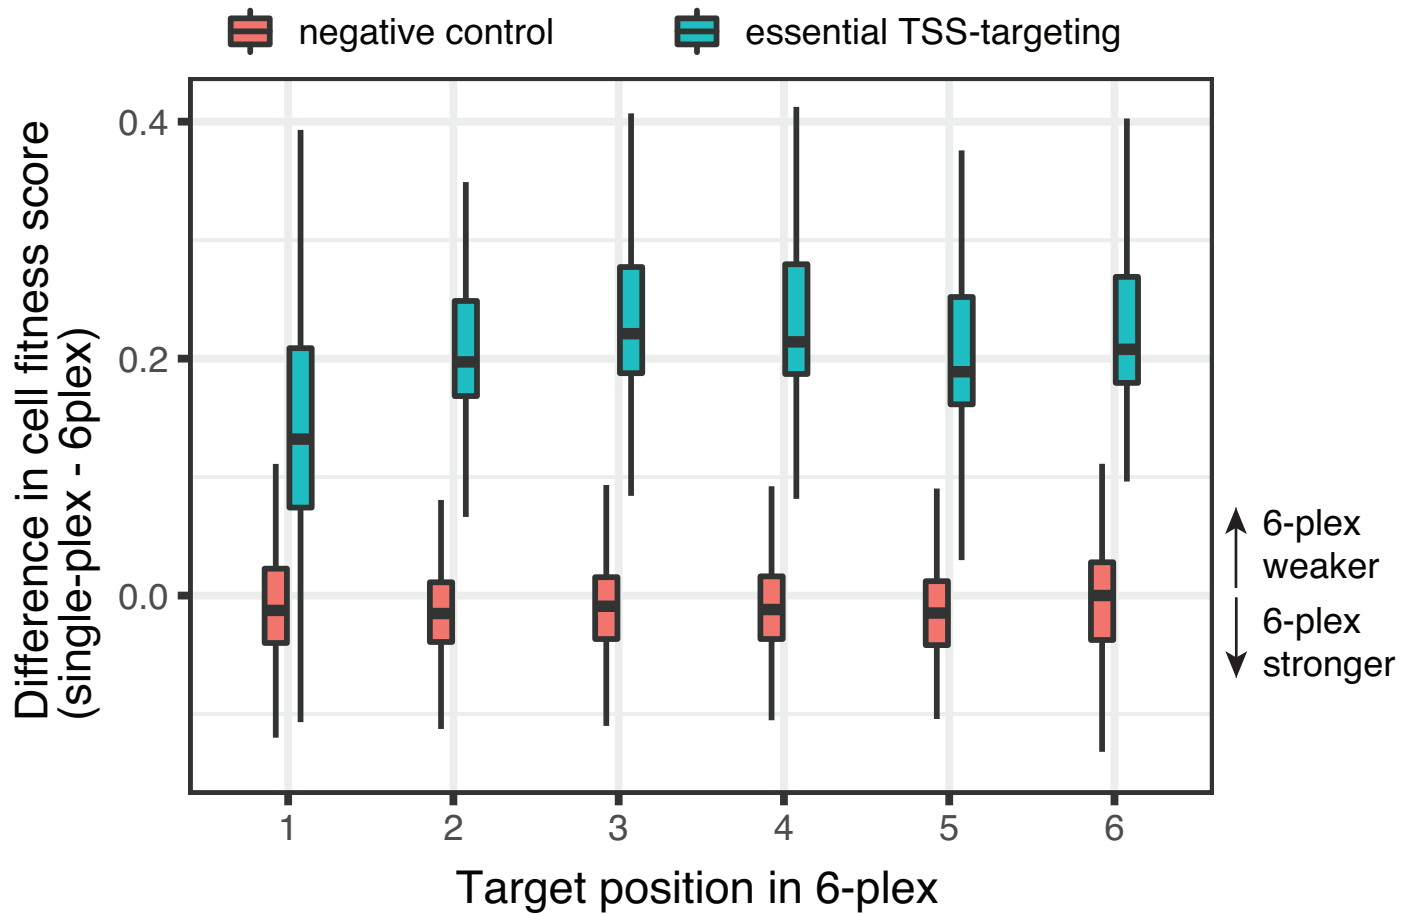

**Figure S20 – Difference in cell fitness scores for 6-plex vs. 1-plex crRNA constructs.** Library 2 Sublibrary A (6-plex crRNA construct with one test position targeting essential TSS) screen cell fitness scores for a given test position spacer are compared to the cell fitness scores of the same spacer in the Library 1 (single-plex crRNA) screen. Difference in cell fitness scores (6-plex minus single-plex) are shown as boxplots, which display the median, interquartile range, and whiskers indicating 1.5x interquartile range.
